# Supplementary material for: Bioorthogonal release of anticancer drugs via gold-triggered 2-alkynylbenzamide cyclization
Source: Royal Society of Chemistry journal article supplement (doi:10.1039/d0sc04329j), 2020-01-01
Supplement: d0sc04329j1.pdf [file d0sc04329j1.pdf]

# Supplementary Information

## Table of Contents

|                                                                  |    |
|------------------------------------------------------------------|----|
| 1. Reactivity Studies .....                                      | 2  |
| 1.1 General Information .....                                    | 2  |
| 1.2 HPLC Methods .....                                           | 2  |
| 1.3 HPLC Analysis (Product Standard Curve and Calibration) ..... | 5  |
| 1.4 Reactivity Study .....                                       | 10 |
| 1.4.1 Protocols and Yield Determination .....                    | 10 |
| 1.4.2 Reactivity Data .....                                      | 12 |
| 1.4.3 By-product Identification .....                            | 15 |
| 1.5 Synthetic Schemes .....                                      | 16 |
| 1.5.1 Reactivity Study Substrates .....                          | 16 |
| 1.5.2 Endoxifen Derivatives .....                                | 46 |
| 1.5.3 Doxorubicin Derivatives .....                              | 49 |
| 1.5.4 Gold Catalyst Complexes .....                              | 60 |
| 1.5.5 Reaction by-products .....                                 | 63 |
| 2. Cell-based Assays .....                                       | 64 |
| 2.1 General Cell Culture Protocol .....                          | 64 |
| 2.2 Cell Viability Studies .....                                 | 64 |
| 2.2.1 MTS Assay Protocol .....                                   | 64 |
| 2.2.2 Controls .....                                             | 64 |
| 2.2.3 Cell Toxicity Results .....                                | 66 |
| 2.3 Cell Permeability Studies .....                              | 69 |
| 2.3.1 Incubation and Imaging Protocol .....                      | 69 |
| 2.3.2 Cell Imaging Results .....                                 | 69 |
| 3. References .....                                              | 76 |

# 1. Reactivity Studies

## 1.1 General Information

All reagents and buffer components were purchased from Sigma-Aldrich, Fisher Scientific, Alfa Aesar, TCI chemicals, or Wako Chemicals without further purification. Notable reagents and their commercial source include Endoxifen (AdooQ BioScience), Doxorubicin Hydrochloride (TCI chemicals), Chloro(1,3-bis(2,6-diisopropylphenyl)imidazol-2-ylidene)gold(I) (TCI chemicals), Dichloro(2-pyridinecarboxylato)gold (Sigma-Aldrich), and Sodium tetrachloroaurate(III) dihydrate (Sigma-Aldrich)

TLC analysis (F-254) were performed with 60 Å silica gel from Merck Millipore. <sup>1</sup>H and <sup>13</sup>C NMR spectra were measured on either a JEOL AL300 (300 MHz) or AL400 (400 MHz) instrument with the solvent peaks as internal standards. High-resolution mass spectroscopy (HRMS) was carried out on a Bruker MicroTOF-QIII electrospray ionization time-of-flight (ESI-TOF) mass spectrometer.

## 1.2 HPLC Methods

Reverse-phase HPLC was used to analyze and purify compounds as indicated. The Shimadzu system (Kyoto, Japan) employed two LC-20AP pumps outfitted with a SPD-20AV photodiode array detector, a RF-10AXL fluorescence detector, and a SIL-20A autosampler. The columns used were a semi-preparative 10 × 250 mm Cosmosil 5C<sub>18</sub>-Ar-300 and an analytical 4.6 × 250 mm Cosmosil 5C<sub>18</sub>-Ar-300 from Nacalai Tesque (Kyoto, Japan). Samples were eluted using a combination of mobile phases A (100% H<sub>2</sub>O), B (100% acetonitrile), C (H<sub>2</sub>O with 0.1% TFA), and D (acetonitrile with 0.1% TFA). The detector was set to 214 and 254 nm. The different elution methods that were employed in this study are shown in Table S1.

|                                     | Flow rate<br>(ml/min) | Time<br>(min) | %A<br>(100% H <sub>2</sub> O) | %B<br>(100% ACN) | %C<br>(H <sub>2</sub> O with<br>0.1% TFA) | %D<br>(ACN with<br>0.1% TFA) |
|-------------------------------------|-----------------------|---------------|-------------------------------|------------------|-------------------------------------------|------------------------------|
| <u>Method 1</u><br><i>Semi-prep</i> | 3.0                   | 0             |                               |                  | 95                                        | 5                            |
|                                     |                       | 10            |                               |                  | 95                                        | 5                            |
|                                     |                       | 40            |                               |                  | 30                                        | 70                           |
|                                     |                       | 43            |                               |                  | 1                                         | 99                           |
|                                     |                       | 50            |                               |                  | 1                                         | 99                           |
|                                     |                       | 58            |                               |                  | 95                                        | 5                            |
|                                     |                       | 60            |                               |                  | 95                                        | 5                            |
| <u>Method 2</u><br><i>Semi-prep</i> | 3.0                   | 0             |                               |                  | 90                                        | 10                           |
|                                     |                       | 10            |                               |                  | 90                                        | 10                           |
|                                     |                       | 40            |                               |                  | 30                                        | 70                           |
|                                     |                       | 43            |                               |                  | 1                                         | 99                           |
|                                     |                       | 50            |                               |                  | 1                                         | 99                           |
|                                     |                       | 58            |                               |                  | 90                                        | 10                           |
|                                     |                       | 60            |                               |                  | 90                                        | 10                           |

**Table S1 (continued).** Gradient profiles for HPLC studies

|                                      | Flow rate<br>(ml/min) | Time<br>(min) | %A<br>(100% H <sub>2</sub> O) | %B<br>(100% ACN) | %C<br>(H <sub>2</sub> O with<br>0.1% TFA) | %D<br>(ACN with<br>0.1% TFA) |
|--------------------------------------|-----------------------|---------------|-------------------------------|------------------|-------------------------------------------|------------------------------|
| <u>Method 3</u><br><i>Semi-prep</i>  | 3.0                   | 0             |                               |                  | 80                                        | 20                           |
|                                      |                       | 10            |                               |                  | 80                                        | 20                           |
|                                      |                       | 40            |                               |                  | 30                                        | 70                           |
|                                      |                       | 43            |                               |                  | 1                                         | 99                           |
|                                      |                       | 50            |                               |                  | 1                                         | 99                           |
|                                      |                       | 58            |                               |                  | 80                                        | 20                           |
|                                      |                       | 60            |                               |                  | 80                                        | 20                           |
| <u>Method 4</u><br><i>Semi-prep</i>  | 3.0                   | 0             |                               |                  | 70                                        | 30                           |
|                                      |                       | 10            |                               |                  | 70                                        | 30                           |
|                                      |                       | 40            |                               |                  | 30                                        | 70                           |
|                                      |                       | 43            |                               |                  | 1                                         | 99                           |
|                                      |                       | 50            |                               |                  | 1                                         | 99                           |
|                                      |                       | 58            |                               |                  | 70                                        | 30                           |
|                                      |                       | 60            |                               |                  | 70                                        | 30                           |
| <u>Method 5</u><br><i>Analytical</i> | 1.0                   | 0             |                               |                  | 95                                        | 5                            |
|                                      |                       | 10            |                               |                  | 95                                        | 5                            |
|                                      |                       | 35            |                               |                  | 60                                        | 40                           |
|                                      |                       | 40            |                               |                  | 5                                         | 95                           |
|                                      |                       | 45            |                               |                  | 5                                         | 95                           |
|                                      |                       | 50            |                               |                  | 95                                        | 5                            |
|                                      |                       | 55            |                               |                  | 95                                        | 5                            |
| <u>Method 6</u><br><i>Semi-prep</i>  | 3.0                   | 0             | 60                            | 40               |                                           |                              |
|                                      |                       | 5             | 60                            | 40               |                                           |                              |
|                                      |                       | 28            | 5                             | 95               |                                           |                              |
|                                      |                       | 32            | 5                             | 95               |                                           |                              |
|                                      |                       | 33            | 60                            | 40               |                                           |                              |
|                                      |                       | 35            | 60                            | 40               |                                           |                              |
| <u>Method 7</u><br><i>Semi-prep</i>  | 3.0                   | 0             | 65                            | 35               |                                           |                              |
|                                      |                       | 5             | 65                            | 35               |                                           |                              |
|                                      |                       | 28            | 5                             | 95               |                                           |                              |
|                                      |                       | 32            | 5                             | 95               |                                           |                              |
|                                      |                       | 33            | 65                            | 35               |                                           |                              |
|                                      |                       | 35            | 65                            | 35               |                                           |                              |

**Table S1 (continued).** Gradient profiles for HPLC studies

|                                      | Flow rate<br>(ml/min) | Time<br>(min) | %A<br>(100% H <sub>2</sub> O) | %B<br>(100% ACN) | %C<br>(H <sub>2</sub> O with<br>0.1% TFA) | %D<br>(ACN with<br>0.1% TFA) |
|--------------------------------------|-----------------------|---------------|-------------------------------|------------------|-------------------------------------------|------------------------------|
| <u>Method 8</u><br><i>Semi-prep</i>  | 3.0                   | 0             | 85                            | 15               |                                           |                              |
|                                      |                       | 3             | 85                            | 15               |                                           |                              |
|                                      |                       | 5             | 60                            | 40               |                                           |                              |
|                                      |                       | 26            | 50                            | 50               |                                           |                              |
|                                      |                       | 28            | 25                            | 75               |                                           |                              |
|                                      |                       | 32            | 25                            | 75               |                                           |                              |
|                                      |                       | 33            | 85                            | 15               |                                           |                              |
|                                      |                       | 37            | 85                            | 15               |                                           |                              |
| <u>Method 9</u><br><i>Semi-prep</i>  | 3.0                   | 0             | 70                            | 30               |                                           |                              |
|                                      |                       | 3             | 70                            | 30               |                                           |                              |
|                                      |                       | 18            | 25                            | 75               |                                           |                              |
|                                      |                       | 22            | 25                            | 75               |                                           |                              |
|                                      |                       | 23            | 70                            | 30               |                                           |                              |
|                                      |                       | 27            | 70                            | 30               |                                           |                              |
| <u>Method 10</u><br><i>Semi-prep</i> | 3.0                   | 0             | 90                            | 10               |                                           |                              |
|                                      |                       | 3             | 90                            | 10               |                                           |                              |
|                                      |                       | 13            | 75                            | 25               |                                           |                              |
|                                      |                       | 30            | 10                            | 90               |                                           |                              |
|                                      |                       | 35            | 90                            | 10               |                                           |                              |
|                                      |                       | 40            | 90                            | 10               |                                           |                              |
| <u>Method 11</u><br><i>Semi-prep</i> | 3.0                   | 0             | 70                            | 30               |                                           |                              |
|                                      |                       | 3             | 70                            | 30               |                                           |                              |
|                                      |                       | 18            | 10                            | 90               |                                           |                              |
|                                      |                       | 22            | 10                            | 90               |                                           |                              |
|                                      |                       | 23            | 70                            | 30               |                                           |                              |
|                                      |                       | 27            | 70                            | 30               |                                           |                              |
| <u>Method 12</u><br><i>Semi-prep</i> | 3.0                   | 0             | 65                            | 35               |                                           |                              |
|                                      |                       | 3             | 65                            | 35               |                                           |                              |
|                                      |                       | 18            | 10                            | 90               |                                           |                              |
|                                      |                       | 22            | 10                            | 90               |                                           |                              |
|                                      |                       | 23            | 65                            | 35               |                                           |                              |
|                                      |                       | 27            | 65                            | 35               |                                           |                              |

### 1.3 HPLC Analysis (Product Standard Curve and Calibration)

To determine yields from HPLC analysis, calibration curves were constructed using product standards of known amounts (shown in Figures S1-S10).

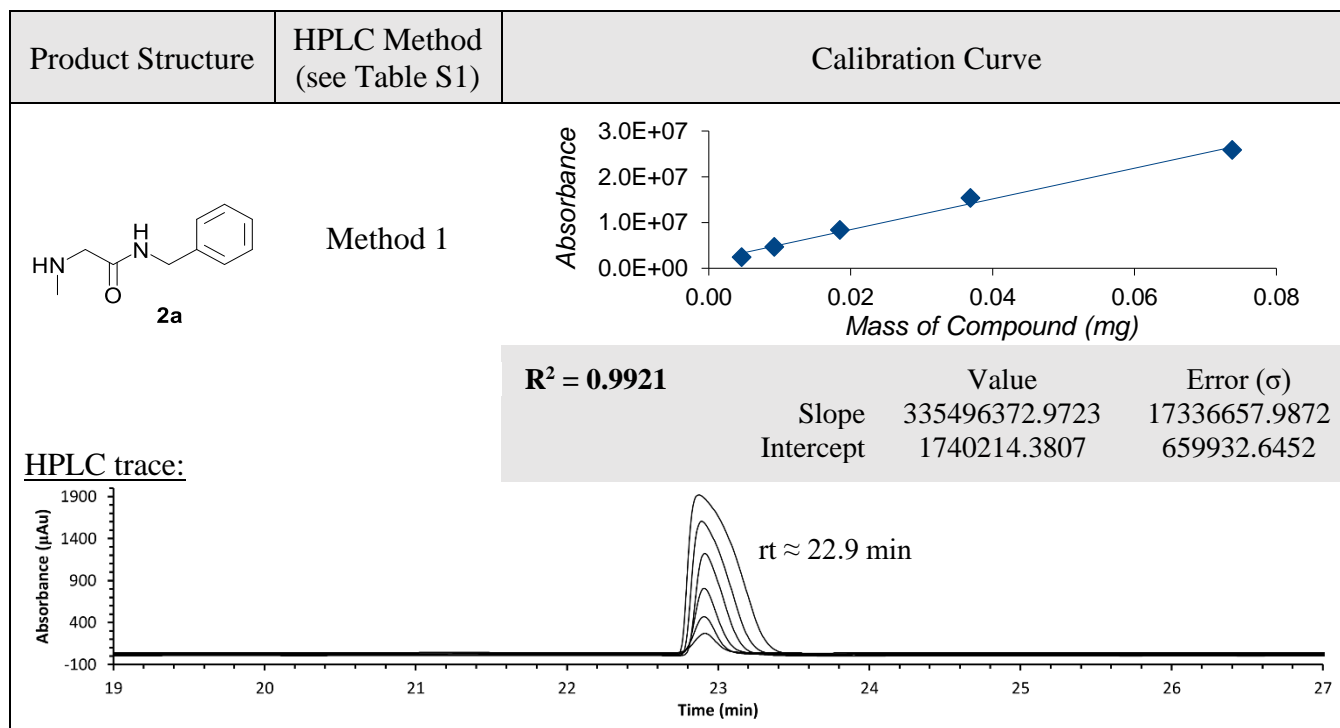

Figure S1. HPLC calibration curve of product **2a**

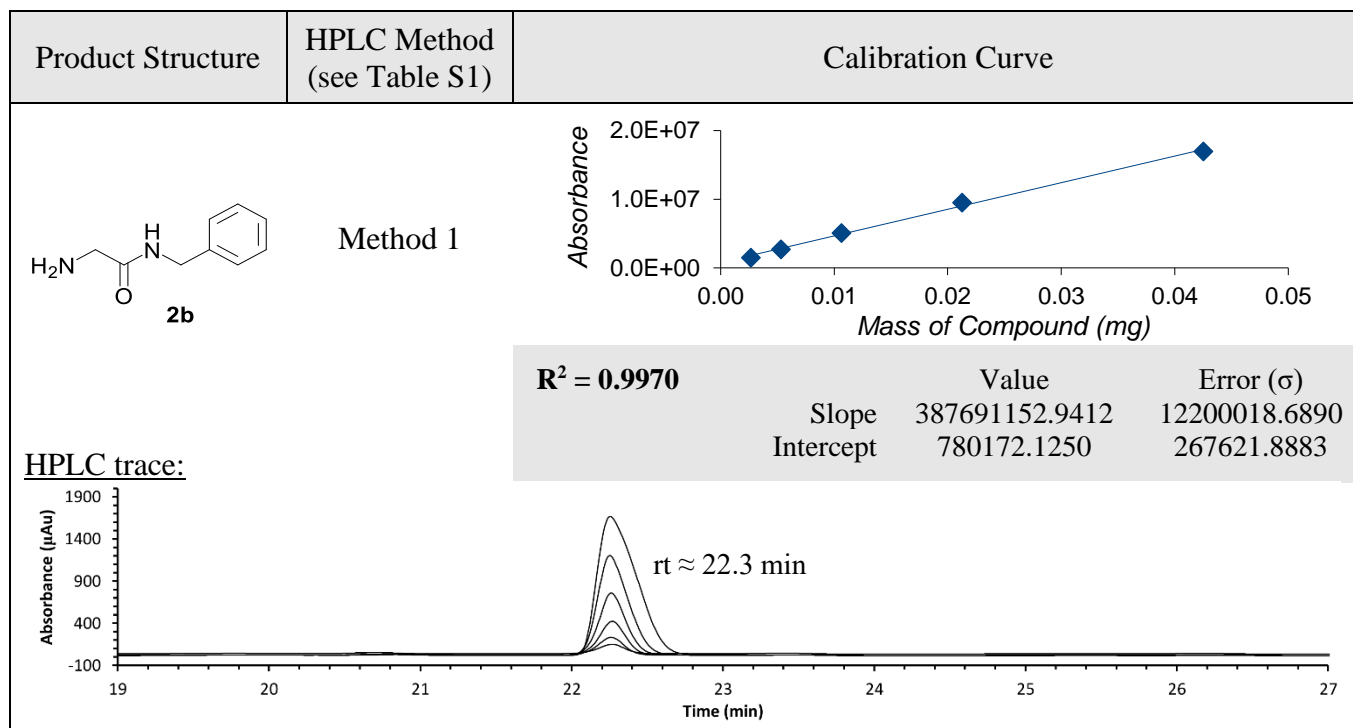

Figure S2. HPLC calibration curve of product **2b**

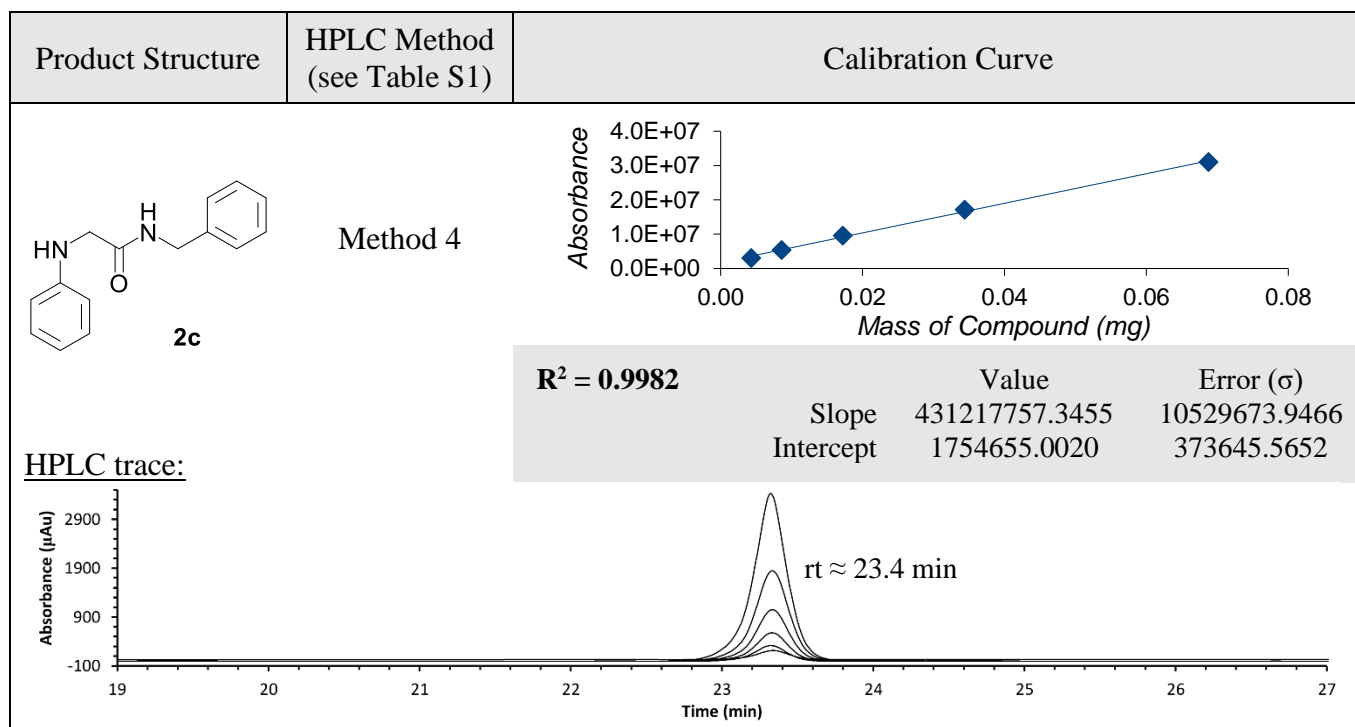

**Figure S3.** HPLC calibration curve of product **2c**

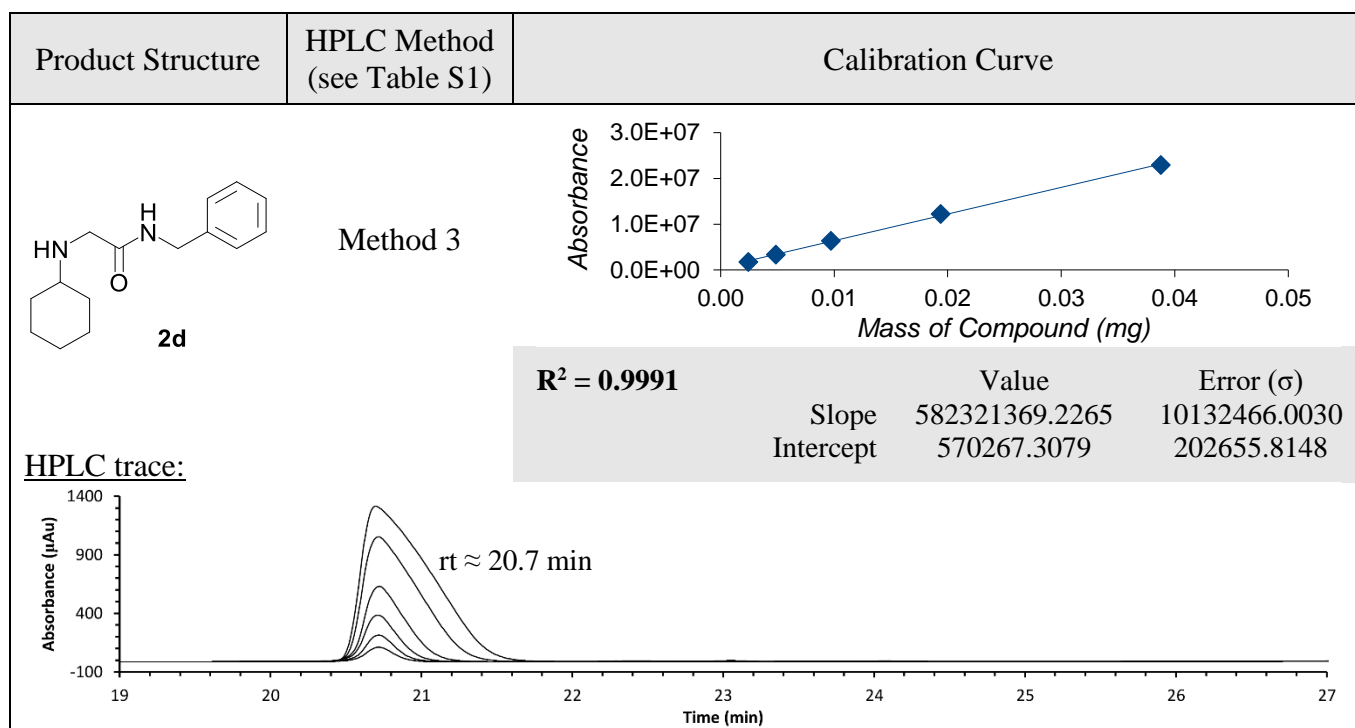

**Figure S4.** HPLC calibration curve of product **2d**

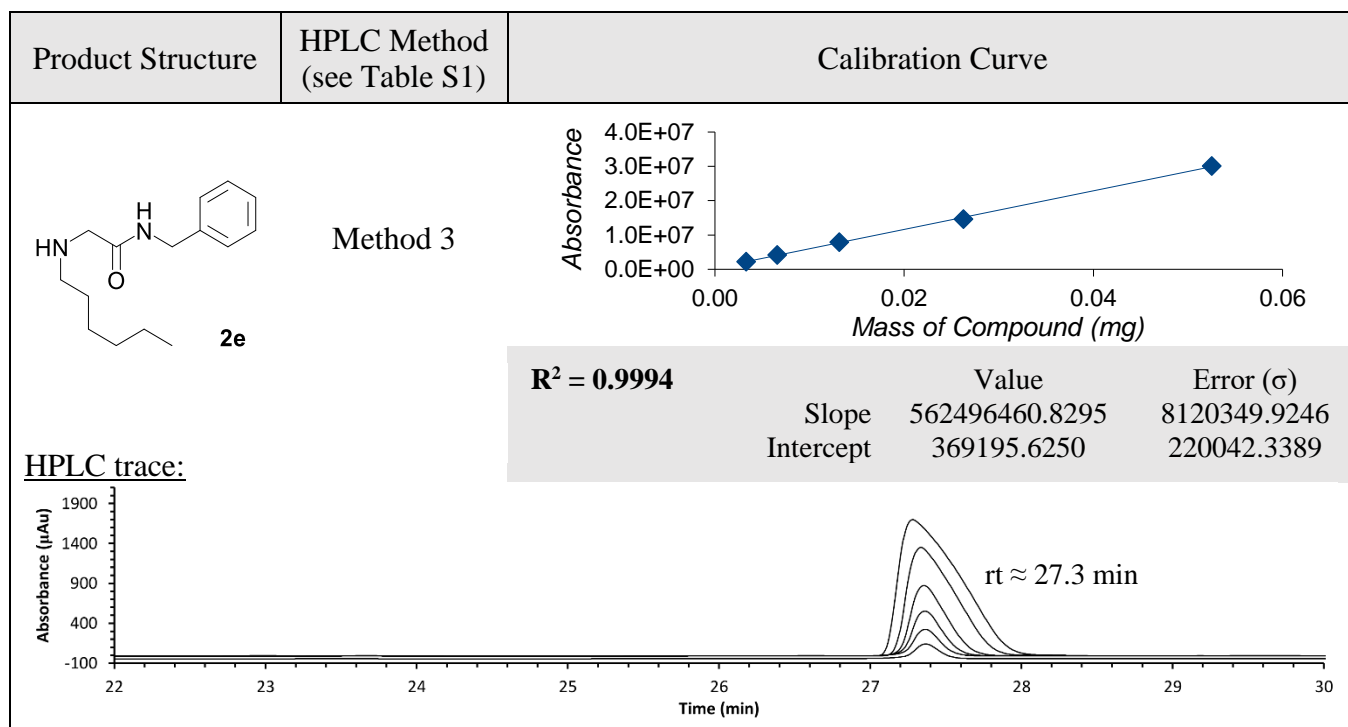

**Figure S5.** HPLC calibration curve of product **2e**

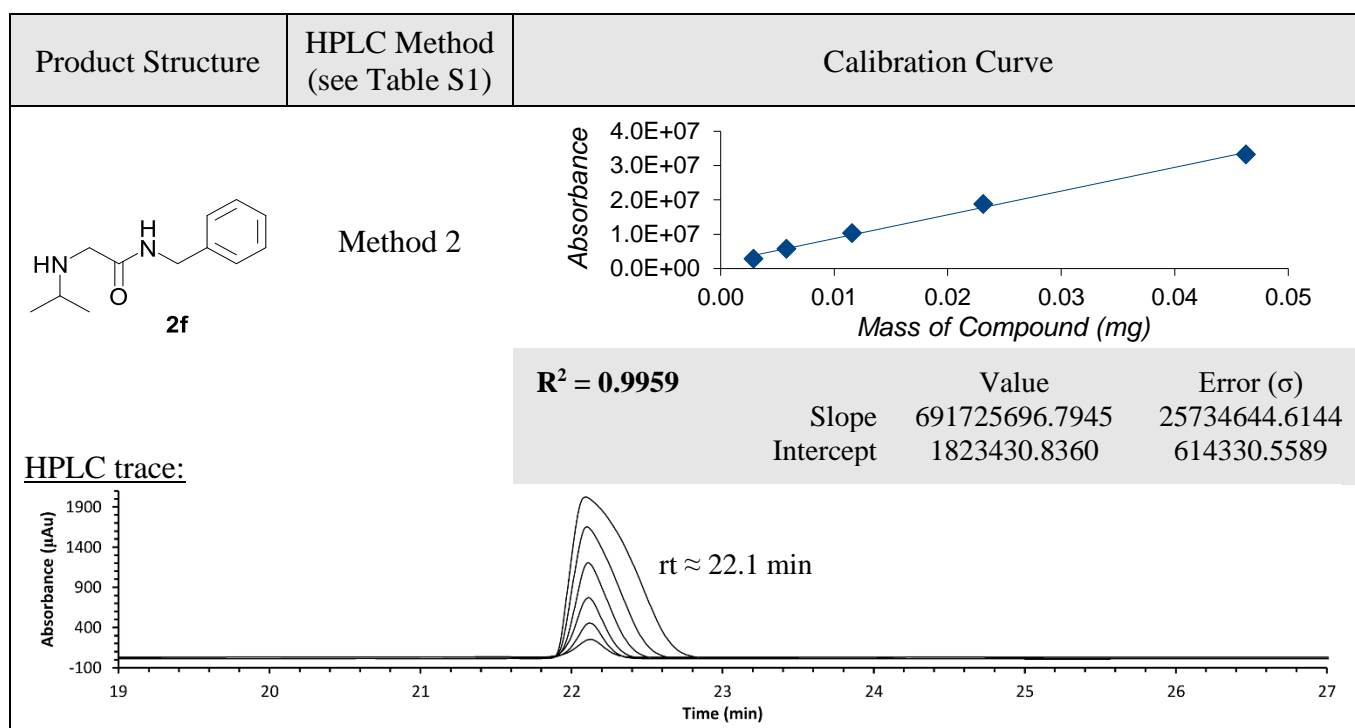

**Figure S6.** HPLC calibration curve of product **2f**

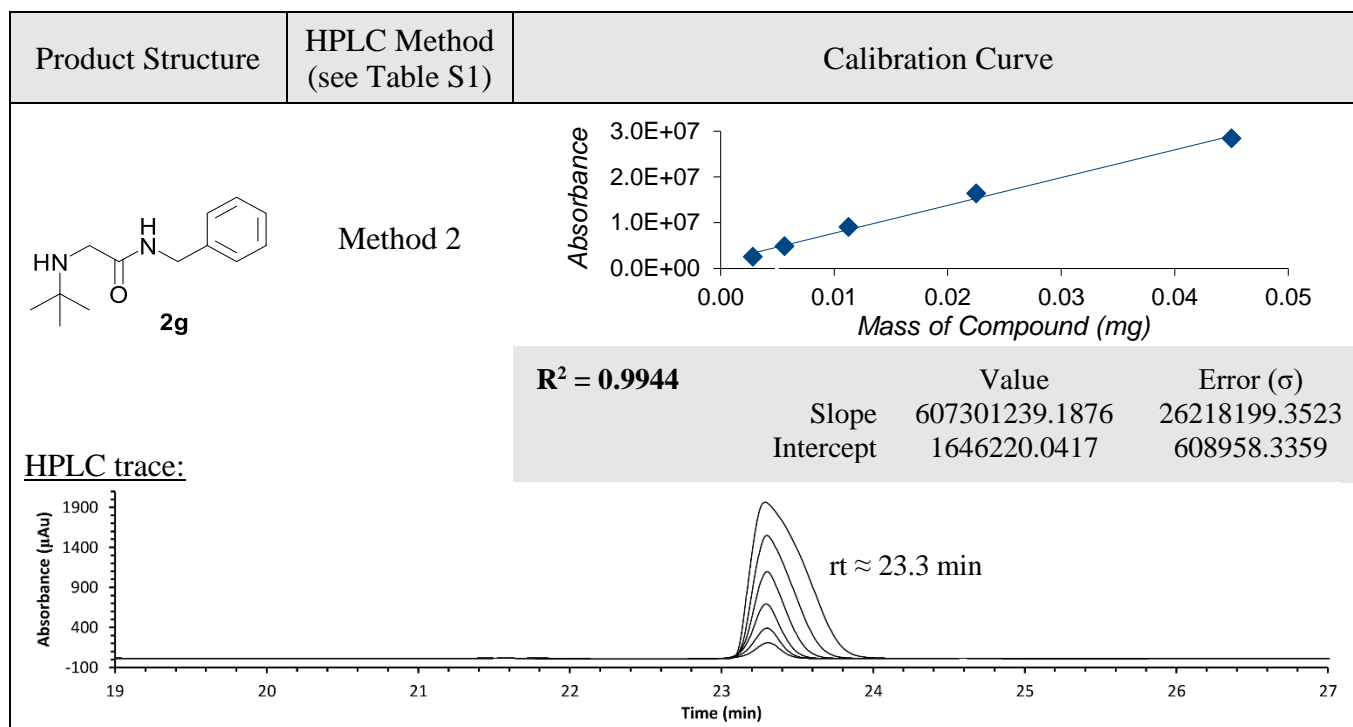

**Figure S7.** HPLC calibration curve of product **2g**

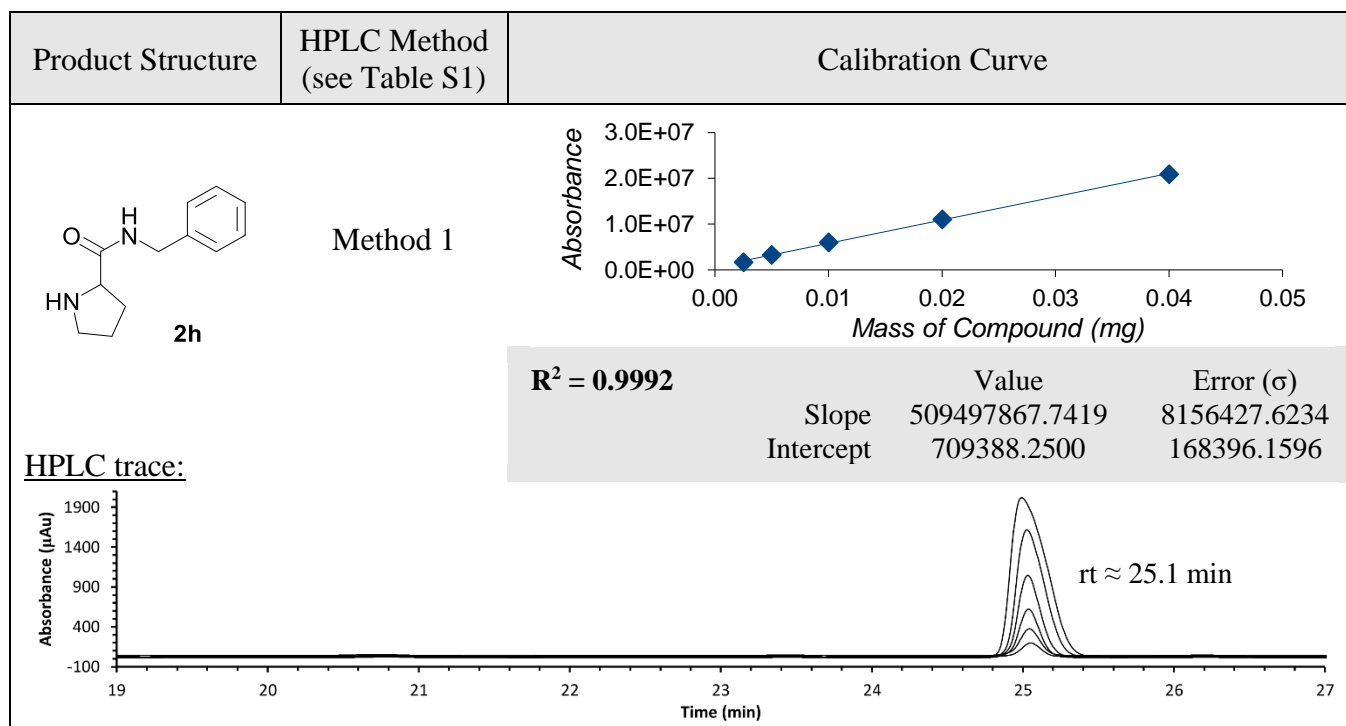

**Figure S8.** HPLC calibration curve of product **2h**



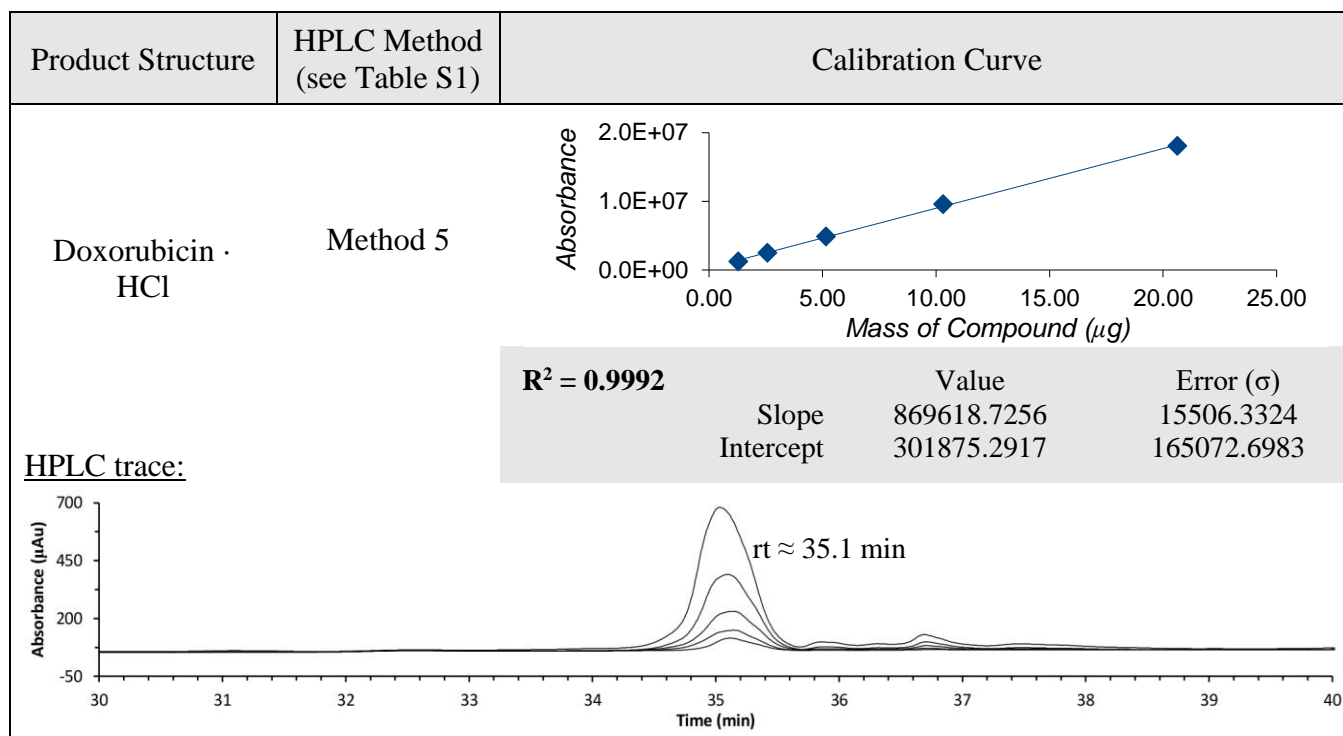

Figure S9. HPLC calibration curve of product Doxorubicin

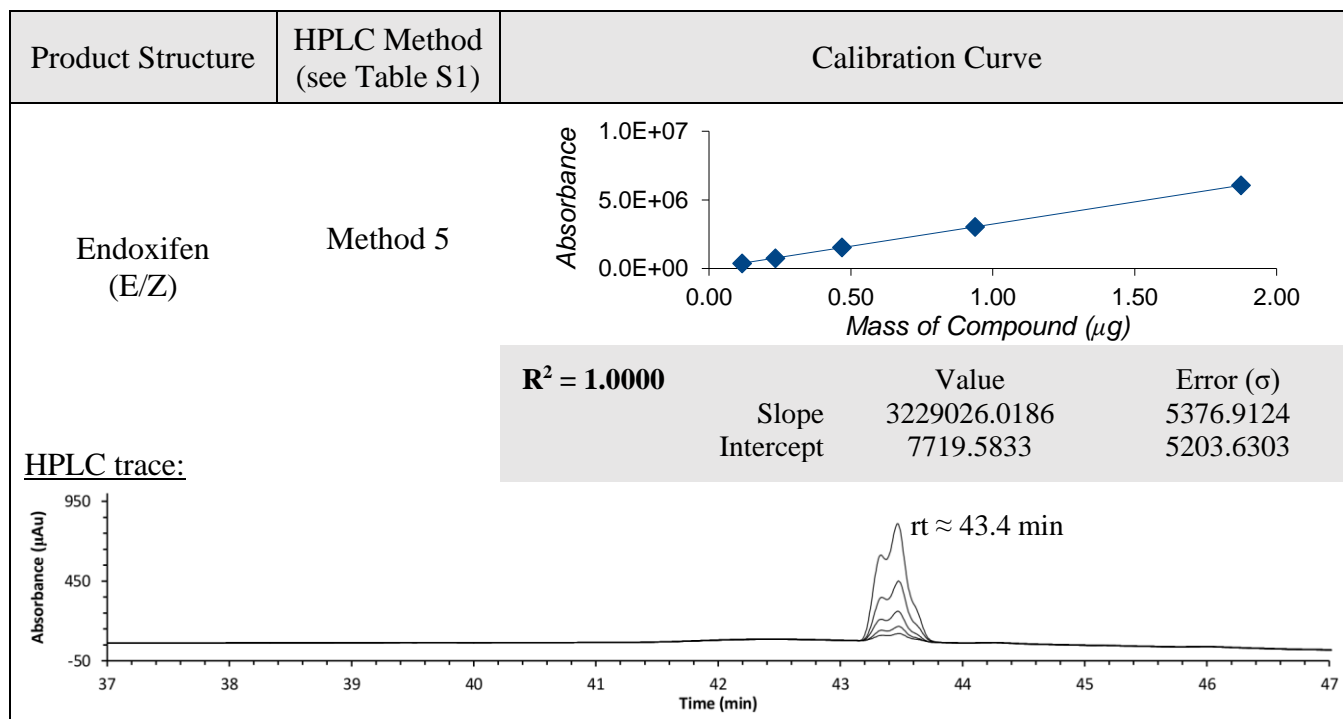

Figure S10. HPLC calibration curve of product Endoxifen

## 1.4 Reactivity Study

### 1.4.1 Protocols and Yield Determination

In general, product identification was determined by MS analysis and comparison with retention times of known product standards. Yields were obtained via HPLC analysis (unless otherwise noted). This was carried out via peak integration, followed by calculations based on product calibration curves shown in Supplementary Section 1.3.

For the model reactivity and derivatization studies, compounds **1a-t** (0.01 mmol) and **Au-1** (concentration adjusted as indicated) were dissolved in solvent (1 ml). The mixtures (in glass test tubes) were then placed on a block temperature-controlled hotplate stirrer (Asynt, UK). Reactions were stirred at the indicated times and temperature. To workup, mixtures were diluted with acetonitrile containing 0.1% TFA (1 ml), filtered, and then injected (50  $\mu$ l) onto a HPLC with an autosampler. Depending on the desired product, HPLC methods 1-4 were used.

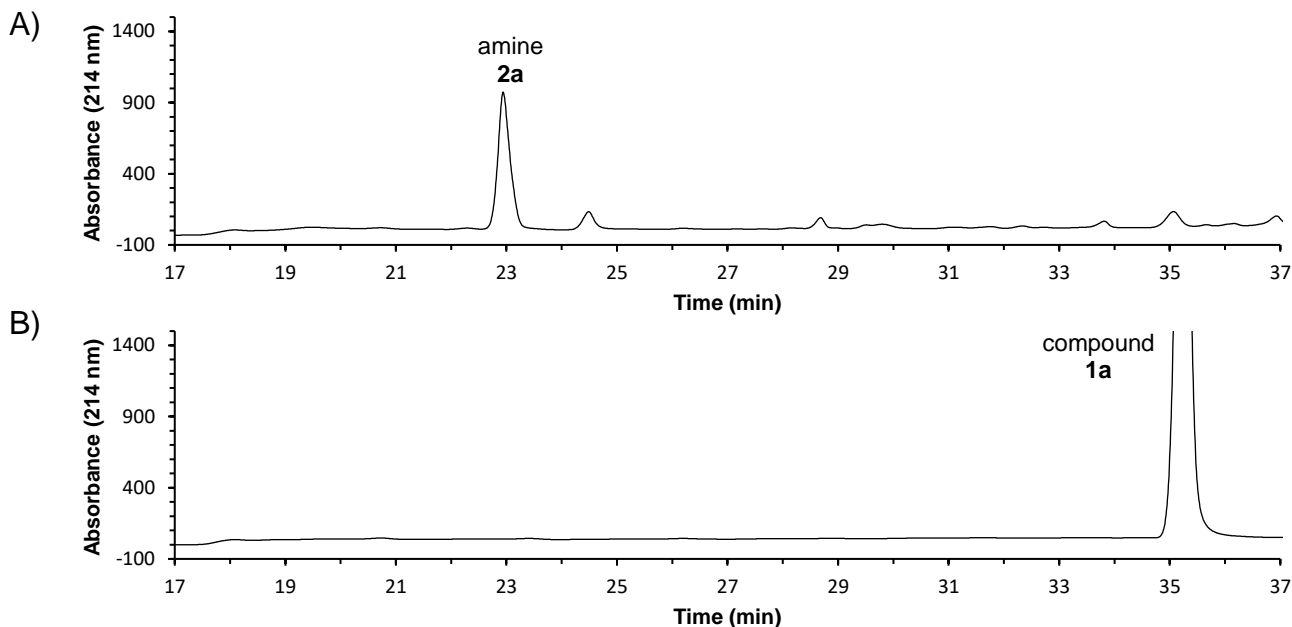

**Figure S11.** A) An example of HPLC trace taken from the reaction mixture of **1a** incubated with **Au-1**. Identified is the released amine product **2a**. B) HPLC trace of the starting material, compound **1a**.

For the individual reactivity studies, prodrugs **3a**, **3m**, **6a**, **6m**, or **7** (30 nmol) and metal catalyst (30 nmol) were dissolved in 50% THF in aqueous solvent (50  $\mu$ l).

For the orthogonal metal reactivity studies, a mixture of prodrug **3a** (30 nmol) and either prodrug **4** or **5** (30 nmol) was made in 50% THF in PBS buffer pH 7.4 (50  $\mu$ l). Depending on the conditions, either **Au-4** (30 nmol), **Ru-2** (30 nmol), or **Pd-3** (30 nmol) was then added.

In general, the mixtures (in eppendorf tubes) were placed in a MD-MINI water bath incubator (Major Science, USA). Without stirring, reactions were left to incubate for 12 hr at 37°C. To workup, mixtures were diluted with 1 mM dodecanethiol in THF (100  $\mu$ l) to quench the metal catalysts. Since doxorubicin is insoluble unless its primary amine is protonated, 1M HCl (50  $\mu$ l) was added to ensure the released compound would match the commercial product standards (i.e. doxorubicin

hydrochloride). The solutions were then filtered, and injected (50  $\mu$ l) onto a HPLC with an autosampler using HPLC method 5.

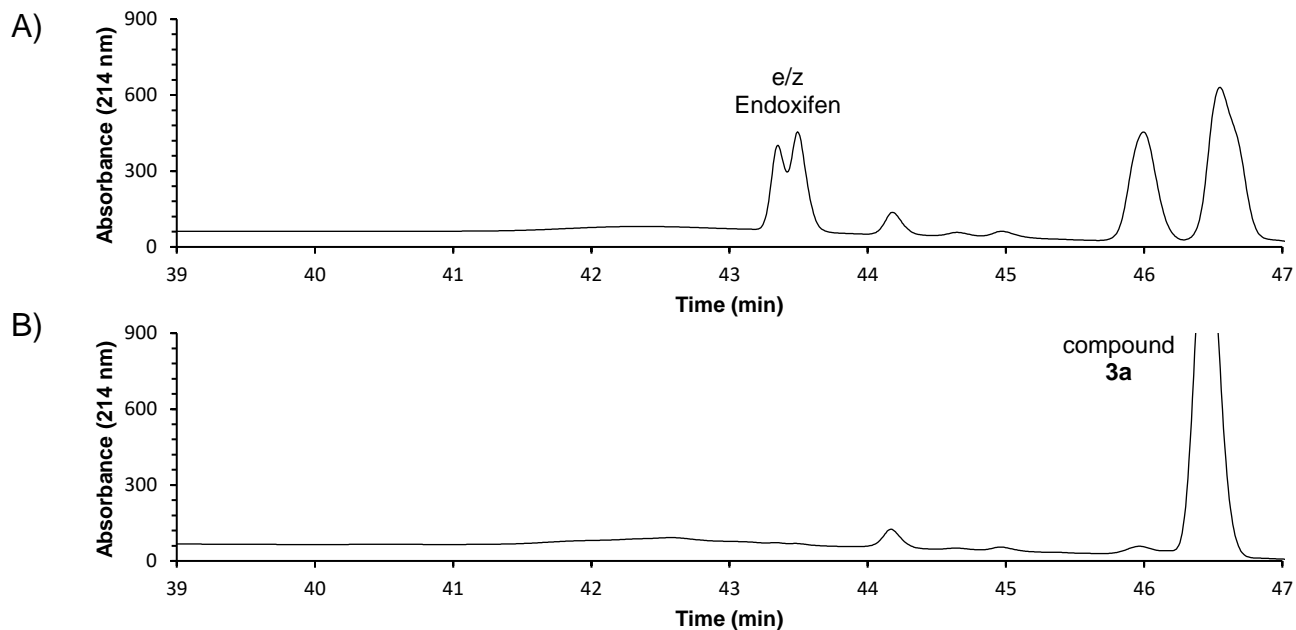

**Figure S12.** A) An example of HPLC trace taken from the reaction mixture of **3a** incubated with **Au-4**. Identified is the released e/z Endoxifen. B) HPLC trace of prodrug **3a**.

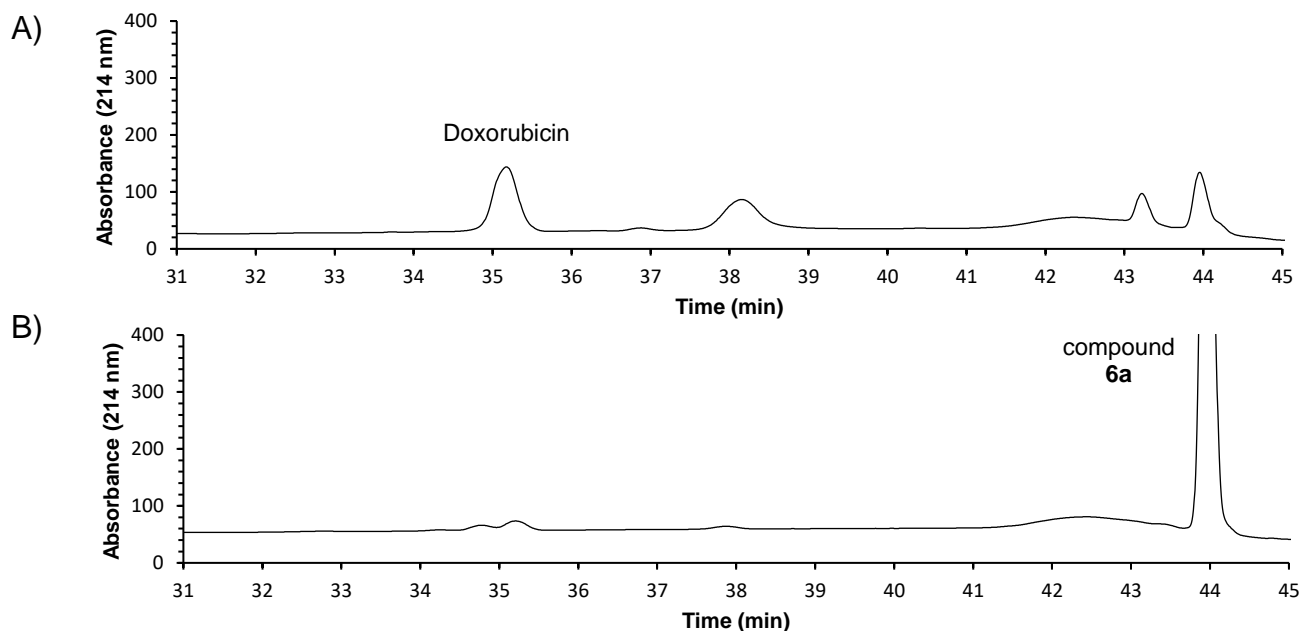

**Figure S13.** A) An example of HPLC trace taken from the reaction mixture of **6a** incubated with **Au-4**. Identified is the released Doxorubicin. B) HPLC trace of prodrug **6a**.

### 1.4.2 Reactivity Data

In Table S2, the model reaction from **1a** to **2a** was shown to be time-dependent (entries 1-3) and temperature-dependent (entries 4-5).

**Table S2.** Investigation into time and temperature dependence

Reaction scheme: **1a** (2-ethynyl-N-methyl-N-(benzylglycyl)benzamide) reacts with 50 mol% **Au-1** (NaAuCl<sub>4</sub> • 2H<sub>2</sub>O) in 10% DMF in PBS buffer, over time and temperature, to yield **2a** (2-(benzylglycylamino)-N-methylbenzamide).

| Entry | Time (hr) | Temp (°C) | Yield of <b>2a</b> (%) <sup>a</sup> |
|-------|-----------|-----------|-------------------------------------|
| 1     | 1         | 37        | 19                                  |
| 2     | 3         | 37        | 44                                  |
| 3     | 6         | 37        | 54                                  |
| 4     | 16        | rt        | 46                                  |
| 5     | 16        | 70        | 69                                  |

<sup>a</sup>Yields determined by HPLC (peak retention times compared to product standards, followed by MS analysis for confirmation, and then calculation of yields based on product standard curves). <sup>b</sup>Isolated yields obtained by column chromatography purification. All reactions were standardized to 10  $\mu$ mol of **1a** in 1 ml of solvent (10 mM).

In Table S3, derivatives **1b-t** were prepared and tested to investigate the factors that could possibly influence amine release.

Alkyne substitution (R<sub>1</sub> position): Pentyl, phenyl, and anisole derivatives **1q-s** were tested, which all largely showed an increase in reactivity. The only example that falls from this pattern is **1t** (entry 20), which may possibly be due to the amine substituent perturbing reactivity by interacting with the Au-catalyst.

Benzyl substitution (R<sub>2</sub>, R<sub>3</sub>, and R<sub>4</sub> positions): Electron-withdrawing groups were shown to increase yields of amine release. From comparing simple fluoro substitutions either at the R<sub>2</sub>, R<sub>3</sub>, and R<sub>4</sub> positions (entries 9-11), it can be observed that the R<sub>3</sub> position (para to the alkyne moiety) gave slightly better yields. Subsequently stronger electron-withdrawing groups at the R<sub>3</sub> position, such as nitro **1l** (56%, entry 12) and trifluoromethyl **1m** (74%, entry 13), gave higher yields of amine release. No significant changes in reactivity were seen with substitutions that were weakly electron-donating (methyl, entry 14) and moderately electron-donating (methoxy, entries 15-16). A possible explanation for these observations is that para-positioned electron withdrawing groups likely has a stronger effect in pulling electron density away from the alkyne, thereby better activating it for Au-catalyzed cyclization.

*N*-substitution (R<sub>5</sub> position): Unsubstituted amide **1b** showed no detectable levels of Au-triggered amine release (entry 2). Longer and bulkier alkyl groups generally led to lower yields of amine release (c-hexyl, hexyl, isopropyl, and t-butyl, entries 4-7). The same observation was also seen by replacement with an aromatic group (phenyl, entry 3) and an intramolecularly-linked alkane (proline-based amine, entry 8). Likely, the observed reductions in amine release are the outcome of steric bulk outweighing the alpha effects of *N*-substitution.

**Table S3.** Reactivity of Ayba group derivatizes

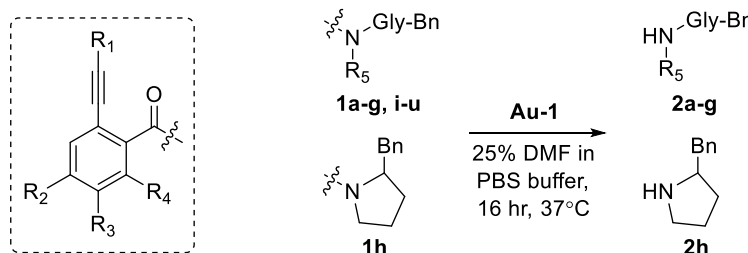

| Entry | SM        | R <sub>1</sub>        | R <sub>2</sub>  | R <sub>3</sub>  | R <sub>4</sub> | R <sub>5</sub>  | Prod      | Yield of <b>2a-h</b> (%) <sup>a</sup> |
|-------|-----------|-----------------------|-----------------|-----------------|----------------|-----------------|-----------|---------------------------------------|
| 1     | <b>1a</b> | H                     | H               | H               | H              | CH <sub>3</sub> | <b>2a</b> | 36                                    |
| 2     | <b>1b</b> | H                     | H               | H               | H              | H               | <b>2b</b> | 0                                     |
| 3     | <b>1c</b> | H                     | H               | H               | H              | Ph              | <b>2c</b> | 13                                    |
| 4     | <b>1d</b> | H                     | H               | H               | H              | c-hexyl         | <b>2d</b> | 15                                    |
| 5     | <b>1e</b> | H                     | H               | H               | H              | hexyl           | <b>2e</b> | 20                                    |
| 6     | <b>1f</b> | H                     | H               | H               | H              | iPr             | <b>2f</b> | 11                                    |
| 7     | <b>1g</b> | H                     | H               | H               | H              | t-butyl         | <b>2g</b> | 5                                     |
| 8     | <b>1h</b> | H                     | H               | H               | H              |                 | <b>2h</b> | 21                                    |
| 9     | <b>1i</b> | H                     | F               | H               | H              | CH <sub>3</sub> | <b>2a</b> | 45                                    |
| 10    | <b>1j</b> | H                     | H               | F               | H              | CH <sub>3</sub> | <b>2a</b> | 47                                    |
| 11    | <b>1k</b> | H                     | H               | H               | F              | CH <sub>3</sub> | <b>2a</b> | 41                                    |
| 12    | <b>1l</b> | H                     | H               | NO <sub>2</sub> | H              | CH <sub>3</sub> | <b>2a</b> | 56                                    |
| 13    | <b>1m</b> | H                     | H               | CF <sub>3</sub> | H              | CH <sub>3</sub> | <b>2a</b> | 74                                    |
| 14    | <b>1n</b> | H                     | CH <sub>3</sub> | CH <sub>3</sub> | H              | CH <sub>3</sub> | <b>2a</b> | 43                                    |
| 15    | <b>1o</b> | H                     | OMe             | H               | H              | CH <sub>3</sub> | <b>2a</b> | 56                                    |
| 16    | <b>1p</b> | H                     | H               | OMe             | H              | CH <sub>3</sub> | <b>2a</b> | 45                                    |
| 17    | <b>1q</b> | pentyl                | H               | H               | H              | CH <sub>3</sub> | <b>2a</b> | 62                                    |
| 18    | <b>1r</b> | Ph                    | H               | H               | H              | CH <sub>3</sub> | <b>2a</b> | 50                                    |
| 19    | <b>1s</b> | 4-OMe-Ph              | H               | H               | H              | CH <sub>3</sub> | <b>2a</b> | 48                                    |
| 20    | <b>1t</b> | 4-NH <sub>2</sub> -Ph | H               | H               | H              | CH <sub>3</sub> | <b>2a</b> | 30                                    |

<sup>a</sup>Yields determined by HPLC (peak retention times compared to product standards, followed by MS analysis for confirmation, and then calculation of yields based on product standard curves). All reactions were standardized to 10 μmol of **1a-t** and 5 μmol of **Au-1** in 1 ml of solvent (10 mM).

In Table S4, the reactivity of the tested metal catalyst complexes (**Au-2**, **Au-3**, **Au-4**) were compared under aqueous conditions containing either pure water or PBS buffer pH 7.4. Due to the instability of **Au-2** and **Au-3** complexes, both **3a** and **3m** experienced a noticeable drop in reactivity when switching to buffered conditions.

**Table S4.** Investigation into the stability between Au(I) and Au(III) catalysts

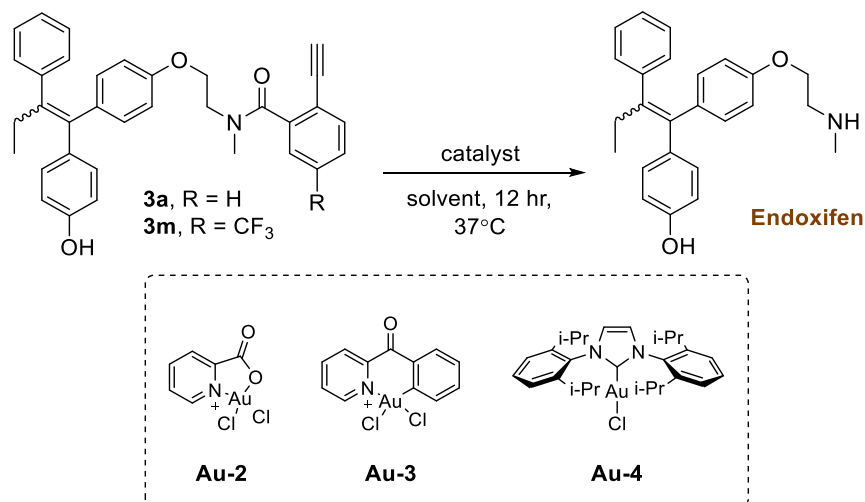

| Entry | Substrate | Catalyst    | Yield of Release (%) <sup>a</sup> |                          |
|-------|-----------|-------------|-----------------------------------|--------------------------|
|       |           |             | 50% THF<br>in H <sub>2</sub> O    | 50% THF<br>in PBS buffer |
| 1     | <b>3a</b> | -           | <1                                | <1                       |
| 2     | <b>3a</b> | <b>Au-2</b> | 37                                | 6                        |
| 3     | <b>3a</b> | <b>Au-3</b> | 44                                | 19                       |
| 4     | <b>3a</b> | <b>Au-4</b> | 20                                | 60                       |
| 5     | <b>3m</b> | -           | <1                                | <1                       |
| 6     | <b>3m</b> | <b>Au-2</b> | 60                                | 3                        |
| 7     | <b>3m</b> | <b>Au-3</b> | 62                                | 22                       |
| 8     | <b>3m</b> | <b>Au-4</b> | 60                                | 60                       |

<sup>a</sup>Yields determined by HPLC (peak retention times compared to product standards, followed by MS analysis for confirmation, and then calculation of yields based on product standard curves). All reactions were standardized to 30 nmol of **3a,m** and 30 nmol of catalyst in 50  $\mu$ l of solvent (600  $\mu$ M).

### 1.4.3 By-product Identification

For Ayba-decaging to occur, the initial transformation involves a nucleophilic cyclization process where a bond-forming interaction occurs between the lone-pair orbital of the carbonyl-O and the in-plane alkyne  $\pi^*$  orbital. Depending on the type of catalyst (and its ligand), either a 5-exo-dig or 6-endo-dig cyclization will proceed. As highlighted in Scheme S1, the resultant by-product **46** was purified from a model substrate **1q**. Differentiation between the exo and endo forms can be made by NMR analysis, where protons at the C-1 position of **46** are expected to be down-shifted compared to the substrate.

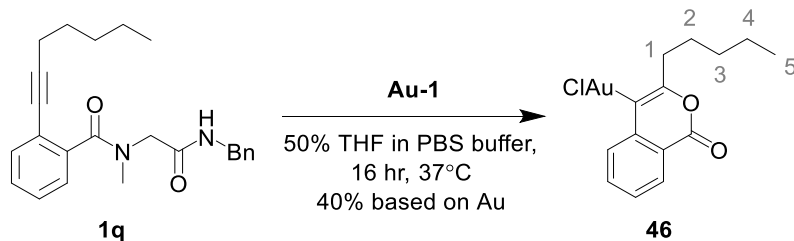

**Scheme S1.** Identification of the by-product **46**

## 1.5 Synthetic Schemes

### 1.5.1 Reactivity Study Substrates

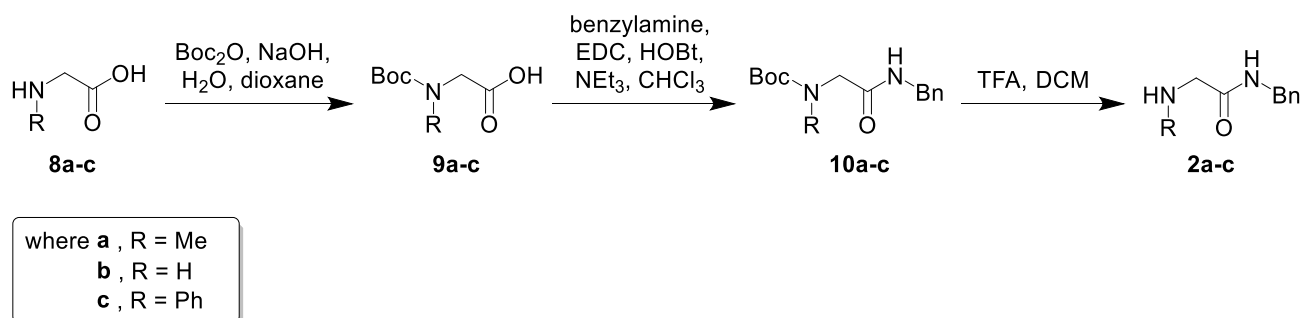

Scheme S2. Synthesis of **2a-c**

Preparation of **9a** :

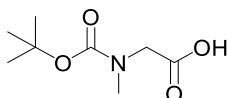

*N*-methylglycine **8a** (593 mg, 6.66 mmol) was dissolved in dioxane (10 ml) and H<sub>2</sub>O (6 ml). NaOH (1.2 g, 30 mmol) dissolved in H<sub>2</sub>O (2 ml) was added and the mixture was cooled to 0°C. Boc anhydride (1.73 g, 7.92 mmol) dissolved in dioxane (2 ml) was then added dropwise and the mixture was stirred for 16 hr at room temperature. To workup, dioxane in the mixture was evaporated under vacuum and the residual solution was washed with EtOAc. The aqueous layer was then acidified to pH~3 with 1N HCl, which allowed the product to be extracted with CHCl<sub>3</sub>. The combined organic layer was washed with H<sub>2</sub>O, brine, dried over sodium sulfate, and evaporated under vacuum to give the desired pure compound. Yield: 1250 mg, quan. Characterization matched a previous report of this known compound.<sup>1</sup> <sup>1</sup>H NMR (DMSO-d<sub>6</sub>, 300 MHz) δ 12.58 (br s, 1H), 3.83 (d, *J* = 5.2 Hz, 2H), 2.80 (d, *J* = 10.8 Hz, 3H), 1.36 (d, *J* = 15.1 Hz, 9H).

Preparation of **9c** :

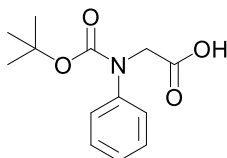

*N*-Phenylglycine **8c** (500 mg, 3.31 mmol) was dissolved in 1:1 acetone/H<sub>2</sub>O (6ml). Boc anhydride (2.16 g, 9.89 mmol) dissolved in acetone (1 ml) was then added dropwise and the mixture was stirred for 16 hr at room temperature. To workup, acetone in the mixture was evaporated under vacuum and the residual solution was washed with ether. The aqueous layer was then acidified to pH~3 with 1N HCl, which allowed the product to be extracted with CHCl<sub>3</sub>. The combined organic layer was washed with H<sub>2</sub>O, brine, dried over sodium sulfate, and evaporated under vacuum. Flash column chromatography using a gradient of 0-10% MeOH in CHCl<sub>3</sub> was used to purify the desired compound. Yield: 804 mg, 97%. *R*<sub>f</sub>=0.29 (MeOH/CHCl<sub>3</sub>, 1:10). Characterization matched a previous report of this known compound.<sup>2</sup> <sup>1</sup>H NMR (DMSO-d<sub>6</sub>, 400 MHz) δ 12.78 (br s, 1H), 7.34-7.15 (m, 5H), 4.19 (s, 2H), 1.36 (s, 9H).



Preparation of **10a** :

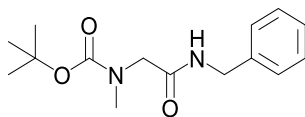

Compound **9a** (951 mg, 5.03 mmol), benzylamine (550  $\mu$ l, 5.03 mmol), EDC (1558 mg, 10.06 mmol), HOBT (1357 mg, 10.06 mmol) were dissolved in  $\text{CHCl}_3$  (10 ml).  $\text{NEt}_3$  (1.4 ml, 10.06 mmol) was then added and the mixture was stirred for 16 hr at room temperature under  $\text{N}_2$ . To workup, the solvent was evaporated under vacuum and the mixture redissolved in EtOAc. The organic layer was then washed with  $\text{H}_2\text{O}$ , brine, dried over sodium sulfate, and evaporated under vacuum. Flash column chromatography using a gradient of 10-50% EtOAc in Hex was used to purify the desired compound. Yield: 1293 mg, 92%.  $R_f=0.26$  (EtOAc/Hex, 1:1).  $^1\text{H NMR}$  ( $\text{CDCl}_3$ , 300 MHz)  $\delta$  7.35-7.23 (m, 5H), 4.46 (d,  $J = 5.9$  Hz, 2H), 3.89 (s, 2H), 2.93 (s, 3H), 1.40 (s, 9H);  $^{13}\text{C NMR}$  ( $\text{CDCl}_3$ , 75 MHz):  $\delta$  169.6, 155.6, 138.2, 128.9, 127.8, 127.7, 80.9, 53.4, 43.3, 35.9, 28.3. **HRMS** for  $\text{C}_{15}\text{H}_{22}\text{N}_2\text{O}_3$   $[\text{M}+\text{Na}]^+$  calcd. 301.1523 found 301.1517.

Preparation of **10b** :

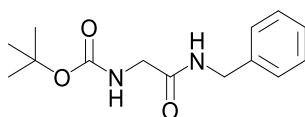

*N*-Boc-glycine **9b** (100 mg, 0.571 mmol), benzylamine (63  $\mu$ l, 0.571 mmol), EDC (177 mg, 1.14 mmol), HOBT (154 mg, 1.14 mmol) were dissolved in  $\text{CHCl}_3$  (10 ml).  $\text{NEt}_3$  (160  $\mu$ l, 1.14 mmol) was then added and the mixture was stirred for 16 hr at room temperature under  $\text{N}_2$ . To workup, the solvent was evaporated under vacuum and the mixture redissolved in EtOAc. The organic layer was then washed with  $\text{H}_2\text{O}$ , brine, dried over sodium sulfate, and evaporated under vacuum. Flash column chromatography using a gradient of 10-50% EtOAc in Hex was used to purify the desired compound. Yield: 538 mg, 89%.  $R_f=0.21$  (EtOAc/Hex, 1:1).  $^1\text{H NMR}$  ( $\text{CDCl}_3$ , 300 MHz)  $\delta$  7.36-7.24 (m, 5H), 6.51 (br s, 1H), 5.19 (br s, 1H), 4.46 (d,  $J = 5.6$  Hz, 2H), 3.82 (d,  $J = 5.9$  Hz, 2H), 1.42 (s, 9H);  $^{13}\text{C NMR}$  ( $\text{CDCl}_3$ , 75 MHz):  $\delta$  169.6, 156.3, 138.1, 128.9, 127.9, 127.8, 80.6, 44.7, 43.5, 28.3. **HRMS** for  $\text{C}_{14}\text{H}_{20}\text{N}_2\text{O}_3$   $[\text{M}+\text{Na}]^+$  calcd. 287.1366, found 287.1369.

Preparation of **10c** :

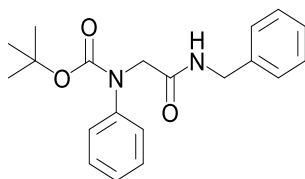

Compound **9c** (830 mg, 3.31 mmol), benzylamine (362  $\mu$ l, 3.31 mmol), EDC (1025 mg, 6.61 mmol), HOBT (893 mg, 6.61 mmol) were dissolved in  $\text{CHCl}_3$  (10 ml).  $\text{NEt}_3$  (924  $\mu$ l, 6.61 mmol) was then added and the mixture was stirred for 16 hr at room temperature under  $\text{N}_2$ . To workup, the solvent was evaporated under vacuum and the mixture redissolved in EtOAc. The organic layer was then washed with  $\text{H}_2\text{O}$ , brine, dried over sodium sulfate, and evaporated under vacuum. Flash column chromatography using a gradient of 10-50% EtOAc in Hex was used to purify the desired compound. Yield: 994 mg, 88%.  $R_f=0.53$  (EtOAc/Hex, 1:1).  $^1\text{H NMR}$  ( $\text{CDCl}_3$ , 300 MHz)  $\delta$  7.36-7.18 (m, 10H), 6.52 (br s, 1H), 4.50 (d,  $J = 5.8$  Hz, 2H), 4.29 (s, 2H), 1.39 (s, 9H);  $^{13}\text{C NMR}$  ( $\text{CDCl}_3$ , 75 MHz):  $\delta$  169.5, 155.0, 142.7, 138.2, 129.2, 128.9, 127.9, 127.8, 126.5, 125.9, 81.9, 54.6, 43.6, 28.2. **HRMS** for  $\text{C}_{20}\text{H}_{24}\text{N}_2\text{O}_3$   $[\text{M}+\text{Na}]^+$  calcd. 363.1679, found 363.1683.

Preparation of **2a** :

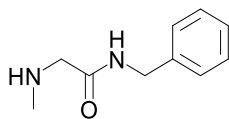

Compound **10a** (1293 mg, 4.65 mmol) was dissolved in a mixture of TFA:DCM (1 ml:1 ml) and stirred for 60 min at room temperature. Completion of the reaction was determined by disappearance of starting material spot on TLC (100% EtOAc). To workup, the reaction was evaporated under vacuum to an oil. Flash column chromatography using a gradient of 0-10% MeOH in CHCl<sub>3</sub> was used to purify the desired compound. Yield: 828 mg, quan. *R<sub>f</sub>*=0.12 (MeOH/CHCl<sub>3</sub>, 1:10). <sup>1</sup>H NMR (CD<sub>3</sub>OD, 300 MHz) δ 7.36-7.23 (m, 5H), 4.43 (s, 2H), 3.82 (s, 2H), 2.73 (s, 3H); <sup>13</sup>C NMR (CD<sub>3</sub>OD, 75 MHz): δ 166.5, 139.4, 129.8, 128.8, 128.6, 50.6, 44.2, 33.5. HRMS for C<sub>10</sub>H<sub>14</sub>N<sub>2</sub>O [M+H]<sup>+</sup> calcd. 179.1179, found 179.1182.

Preparation of **2b** :

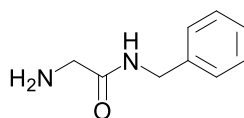

Compound **10b** (235 mg, 0.893 mmol) was dissolved in a mixture of TFA:DCM (1 ml:1 ml) and stirred for 60 min at room temperature. Completion of the reaction was determined by disappearance of starting material spot on TLC (MeOH/CHCl<sub>3</sub>, 1:10). To workup, the reaction was evaporated under vacuum to an oil. Flash column chromatography using a gradient of 0-10% MeOH in CHCl<sub>3</sub> was used to purify the desired compound. Yield: 146 mg, quan. *R<sub>f</sub>*=0.03 (MeOH/CHCl<sub>3</sub>, 1:10). <sup>1</sup>H NMR (CD<sub>3</sub>OD, 300 MHz) δ 7.32-7.18 (m, 5H), 4.39 (s, 2H), 3.68 (s, 2H); <sup>13</sup>C NMR (CD<sub>3</sub>OD, 75 MHz): δ 167.4, 139.5, 129.7, 128.8, 128.6, 44.2, 41.5. HRMS for C<sub>9</sub>H<sub>12</sub>N<sub>2</sub>O [M+Na]<sup>+</sup> calcd. 187.0842, found 187.0846.

Preparation of **2c** :

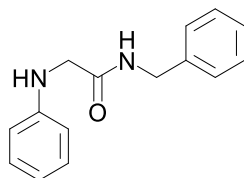

Compound **10c** (225 mg, 0.661 mmol) was dissolved in a mixture of TFA:DCM (1 ml:1 ml) and stirred for 60 min at room temperature. Completion of the reaction was determined by disappearance of starting material spot on TLC (MeOH/CHCl<sub>3</sub>, 1:10). To workup, the reaction was evaporated under vacuum to an oil. Flash column chromatography using a gradient of 0-5% MeOH in CHCl<sub>3</sub> was used to purify the desired compound. Yield: 158 mg, quan. *R<sub>f</sub>*=0.33 (MeOH/CHCl<sub>3</sub>, 1:10). <sup>1</sup>H NMR (CDCl<sub>3</sub>, 300 MHz) δ 7.57 (br s, 2H), 7.43 (br s, 1H), 7.31-7.17 (m, 6H), 6.94 (t, *J* = 7.4 Hz, 1H), 6.77 (d, *J* = 8.3 Hz, 2H), 4.44 (d, *J* = 6.0 Hz, 2H), 3.91 (s, 2H). <sup>13</sup>C NMR (CDCl<sub>3</sub>, 75 MHz): δ 170.9, 145.1, 137.5, 129.8, 128.9, 127.8(2), 121.4, 115.1, 49.5, 43.5. HRMS for C<sub>15</sub>H<sub>16</sub>N<sub>2</sub>O [M+H]<sup>+</sup> calcd. 241.1335, found 241.1339.

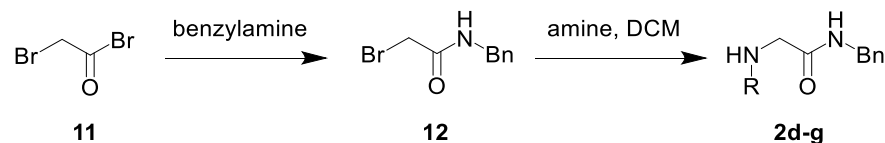

where **d** , R = c-hexyl  
**e** , R = hexyl  
**f** , R = isopropyl  
**g** , R = t-butyl

### Scheme S3. Synthesis of **2d-g**

Preparation of **12** :

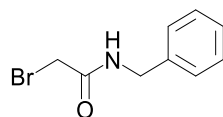

Bromoacetyl bromide **11** (120  $\mu\text{l}$ , 1.38 mmol) was dissolved in DCM (3 ml) and  $\text{K}_2\text{CO}_3$  (506 mg, 3.66 mmol) was dissolved in water (3 ml). Both mixtures were added simultaneously dropwise over 15 min to a solution of benzylamine (100  $\mu\text{l}$ , 0.92 mmol) in DCM (3 ml) at  $0^\circ\text{C}$ . The reaction was then stirred at room temperature for 2 hr. To workup, the reaction was diluted with  $\text{H}_2\text{O}$  and then the organic layer was washed with  $\text{H}_2\text{O}$  (5 $\times$ ), dried over magnesium sulfate, and evaporated under vacuum to give the desired pure compound. Yield: 200 mg, 96%.  $R_f=0.42$  (100% DCM). Characterization matched a previous report of this known compound.<sup>3</sup>  $^1\text{H NMR}$  ( $\text{CD}_2\text{Cl}_2$ , 300 MHz)  $\delta$  7.39-7.26 (m, 5H), 6.73 (br s, 1H), 4.45 (d,  $J = 5.9$  Hz, 2H), 3.91 (s, 2H).

Preparation of **2d** :

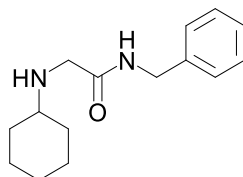

Compound **12** (200 mg, 0.915 mmol) was dissolved in DCM (2 ml). Cyclohexylamine (316  $\mu\text{l}$ , 2.75 mmol) was then added and the mixture was stirred for 16 hr and at room temperature under  $\text{N}_2$ . To workup, the reaction was evaporated under vacuum to an oil. Flash column chromatography using a gradient of 0-5% MeOH in  $\text{CHCl}_3$  was used to purify the desired compound. Yield: 203 mg, 90%.  $R_f=0.27$  (MeOH/ $\text{CHCl}_3$ , 1:10).  $^1\text{H NMR}$  ( $\text{CD}_3\text{OD}$ , 300 MHz)  $\delta$  7.36-7.25 (m, 5H), 4.42 (s, 2H), 3.39 (s, 2H), 2.55-2.46 (m, 1H), 1.93-1.64 (m, 4H), 1.36-1.07 (m, 6H);  $^{13}\text{C NMR}$  ( $\text{CD}_3\text{OD}$ , 75 MHz):  $\delta$  173.2, 139.9, 129.7, 128.8, 128.5, 58.1, 44.0, 33.4, 26.9, 25.9, 18.3. HRMS for  $\text{C}_{15}\text{H}_{22}\text{N}_2\text{O}$  [ $\text{M}+\text{H}$ ]<sup>+</sup> calcd. 247.1805, found 247.1805.

Preparation of **2e** :

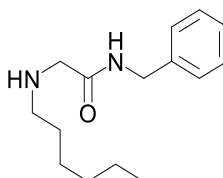

Compound **12** (209 mg, 0.920 mmol) was dissolved in DCM (2 ml). n-Hexylamine (1.2 ml, 9.920 mmol) was then added and the mixture was stirred for 16 hr and at room temperature under  $\text{N}_2$ . To workup, the reaction was evaporated under vacuum to an oil. Flash column chromatography using a gradient of 0-5% MeOH in  $\text{CHCl}_3$  was used to purify the desired compound. Yield: 194 mg, 85%.  $R_f=0.39$  (MeOH/ $\text{CHCl}_3$ , 1:10).  $^1\text{H NMR}$  ( $\text{CD}_3\text{OD}$ , 300 MHz)  $\delta$  7.36-7.23 (m, 5H), 4.42 (s, 2H), 3.27 (s, 2H), 2.55 (t,  $J = 7.3$  Hz, 2H), 1.54-1.44 (m, 2H), 1.37-1.26 (m, 6H), 0.91 (t,  $J = 7.0$  Hz, 3H);  $^{13}\text{C NMR}$  ( $\text{CD}_3\text{OD}$ , 75 MHz):  $\delta$  174.1, 140.0, 129.7, 128.7, 128.4, 52.8, 50.6, 43.9, 32.8, 30.6, 28.0, 23.6, 14.3. HRMS for  $\text{C}_{15}\text{H}_{24}\text{N}_2\text{O}$  [ $\text{M}+\text{H}$ ]<sup>+</sup> calcd. 249.1961, found 249.1959.

Preparation of **2f** :

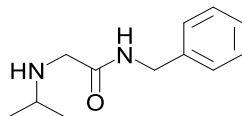

Compound **12** (180 mg, 0.791 mmol) was dissolved in DCM (2 ml). 2-Propylamine (339  $\mu$ l, 3.96 mmol) was then added and the mixture was stirred for 16 hr and at room temperature under  $N_2$ . To workup, the reaction was evaporated under vacuum to an oil. Flash column chromatography using a gradient of 0-5% MeOH in  $CHCl_3$  was used to purify the desired compound. Yield: 139 mg, 85%.  $R_f$ =0.28 (MeOH/ $CHCl_3$ , 1:10).  $^1H$  NMR ( $CD_3OD$ , 300 MHz)  $\delta$  7.37-7.22 (m, 5H), 4.41 (s, 2H), 3.29 (s, 2H), 2.78 (quin,  $J$  = 6.2 Hz, 1H), 1.09-1.05 (m, 6H);  $^{13}C$  NMR ( $CD_3OD$ , 75 MHz):  $\delta$  174.2, 139.9, 129.7, 128.7, 128.4, 50.4, 43.9, 22.6, 18.3. HRMS for  $C_{12}H_{18}N_2O$   $[M+H]^+$  calcd. 207.1492, found 207.1496.

Preparation of **2g** :

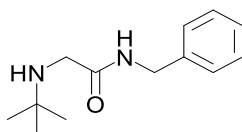

Compound **12** (216 mg, 0.952 mmol) was dissolved in DCM (2 ml). 2-Methyl-2-propylamine (486  $\mu$ l, 4.58 mmol) was then added and the mixture was stirred for 16 hr and at room temperature under  $N_2$ . To workup, the reaction was evaporated under vacuum to an oil. Flash column chromatography using a gradient of 0-5% MeOH in  $CHCl_3$  was used to purify the desired compound. Yield: 154 mg, 74%.  $R_f$ =0.27 (MeOH/ $CHCl_3$ , 1:10).  $^1H$  NMR ( $CD_3OD$ , 300 MHz)  $\delta$  7.35-7.22 (m, 5H), 4.41 (s, 2H), 3.26 (s, 2H), 1.09 (s, 9H);  $^{13}C$  NMR ( $CD_3OD$ , 75 MHz):  $\delta$  175.0, 139.9, 129.7, 128.7, 128.4, 51.5, 46.4, 43.9, 28.8. HRMS for  $C_{13}H_{20}N_2O$   $[M+H]^+$  calcd. 221.1648, found 221.1648.

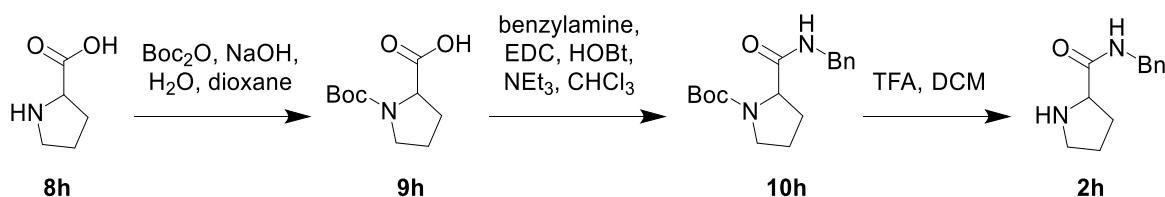

**Scheme S4.** Synthesis of **2h**

Preparation of **9h** :

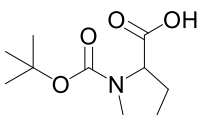

L-Proline **8h** (766 mg, 6.66 mmol) was dissolved in dioxane (6 ml) and H<sub>2</sub>O (10 ml). NaOH (1.2 g, 30 mmol) dissolved in H<sub>2</sub>O (2 ml) was added and the mixture was cooled to 0°C. Boc anhydride (1.73 g, 7.92 mmol) dissolved in dioxane (2 ml) was then added dropwise and the mixture was stirred for 16 hr at room temperature. To workup, dioxane in the mixture was evaporated under vacuum and the residual solution was washed with EtOAc. The aqueous layer was then acidified to pH~3 with 1N HCl, which allowed the product to be extracted with CHCl<sub>3</sub>. The combined organic layer was washed with H<sub>2</sub>O, brine, dried over sodium sulfate, and evaporated under vacuum to give the desired compound. Yield: 1220 mg, 85%. Characterization matched a previous report of this known compound.<sup>4</sup> **<sup>1</sup>H NMR** (CDCl<sub>3</sub>, 300 MHz) δ 8.39 (br s, 1H), 4.44-4.21 (m, 1H), 3.61-3.32 (m, 2H), 2.41-1.84 (m, 4H), 1.59-1.35 (m, 9H).

Preparation of **10h** :

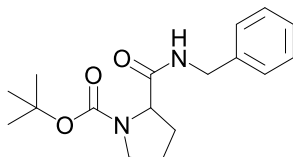

Compound **9h** (411 mg, 1.91 mmol), benzylamine (210 μl, 1.91 mmol), EDC (592 mg, 3.82 mmol), HOBT (516 mg, 3.82 mmol) were dissolved in CHCl<sub>3</sub> (10 ml). NEt<sub>3</sub> (534 μl, 3.82 mmol) was then added and the mixture was stirred for 16 hr at room temperature under N<sub>2</sub>. To workup, the solvent was evaporated under vacuum and the mixture redissolved in EtOAc. The organic layer was then washed with H<sub>2</sub>O, brine, dried over sodium sulfate, and evaporated under vacuum. Flash column chromatography using a gradient of 25-50% EtOAc in Hex was used to purify the desired compound. Yield: 543 mg, 93%. *R*<sub>f</sub>=0.16 (EtOAc/Hex, 1:1). **<sup>1</sup>H NMR** (CDCl<sub>3</sub>, 300 MHz) δ 7.37-7.18 (m, 5H), 6.39 (br s, 1H), 4.63-4.20 (m, 3H), 3.41 (s, 2H), 2.42-1.76 (m, 4H), 1.39 (s, 9H). **<sup>13</sup>C NMR** (CDCl<sub>3</sub>, 75 MHz): δ 172.6, 138.4, 128.8, 127.9, 127.5, 80.7, 60.1, 47.2, 43.4, 31.3, 28.3, 24.6, 7.3. **HRMS** for C<sub>17</sub>H<sub>24</sub>N<sub>2</sub>O<sub>3</sub> [M+Na]<sup>+</sup> calcd. 327.1679, found 327.1683.

Preparation of **2h** :

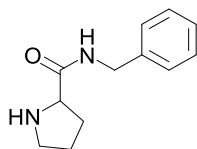

Compound **10h** (875 mg, 2.88 mmol) was dissolved in a mixture of TFA:DCM (1 ml:1 ml) and stirred for 60 min at room temperature. Completion of the reaction was determined by disappearance of starting material spot on TLC (EtOAc/Hex, 1:1). To workup, the reaction was evaporated under vacuum to an oil. Flash column chromatography using a gradient of 0-10% MeOH in CHCl<sub>3</sub> was used to purify the desired compound. Yield: 588 mg, quan. *R*<sub>f</sub>=0.18 (100% EtOAc). **<sup>1</sup>H NMR** (CD<sub>3</sub>OD, 300 MHz) δ 7.30-7.18 (m, 5H), 4.38 (s, 2H), 4.24-4.19 (m, 1H), 3.35-3.23 (m, 2H), 2.42-2.32 (m, 1H), 2.04-1.89 (m, 3H). **<sup>13</sup>C NMR** (CD<sub>3</sub>OD, 75 MHz): δ 169.9, 139.5, 129.8, 128.8, 128.6, 61.2, 47.3, 44.4, 31.0, 25.1. **HRMS** for C<sub>12</sub>H<sub>16</sub>N<sub>2</sub>O [M+H]<sup>+</sup> calcd. 205.1335, found 205.1339.

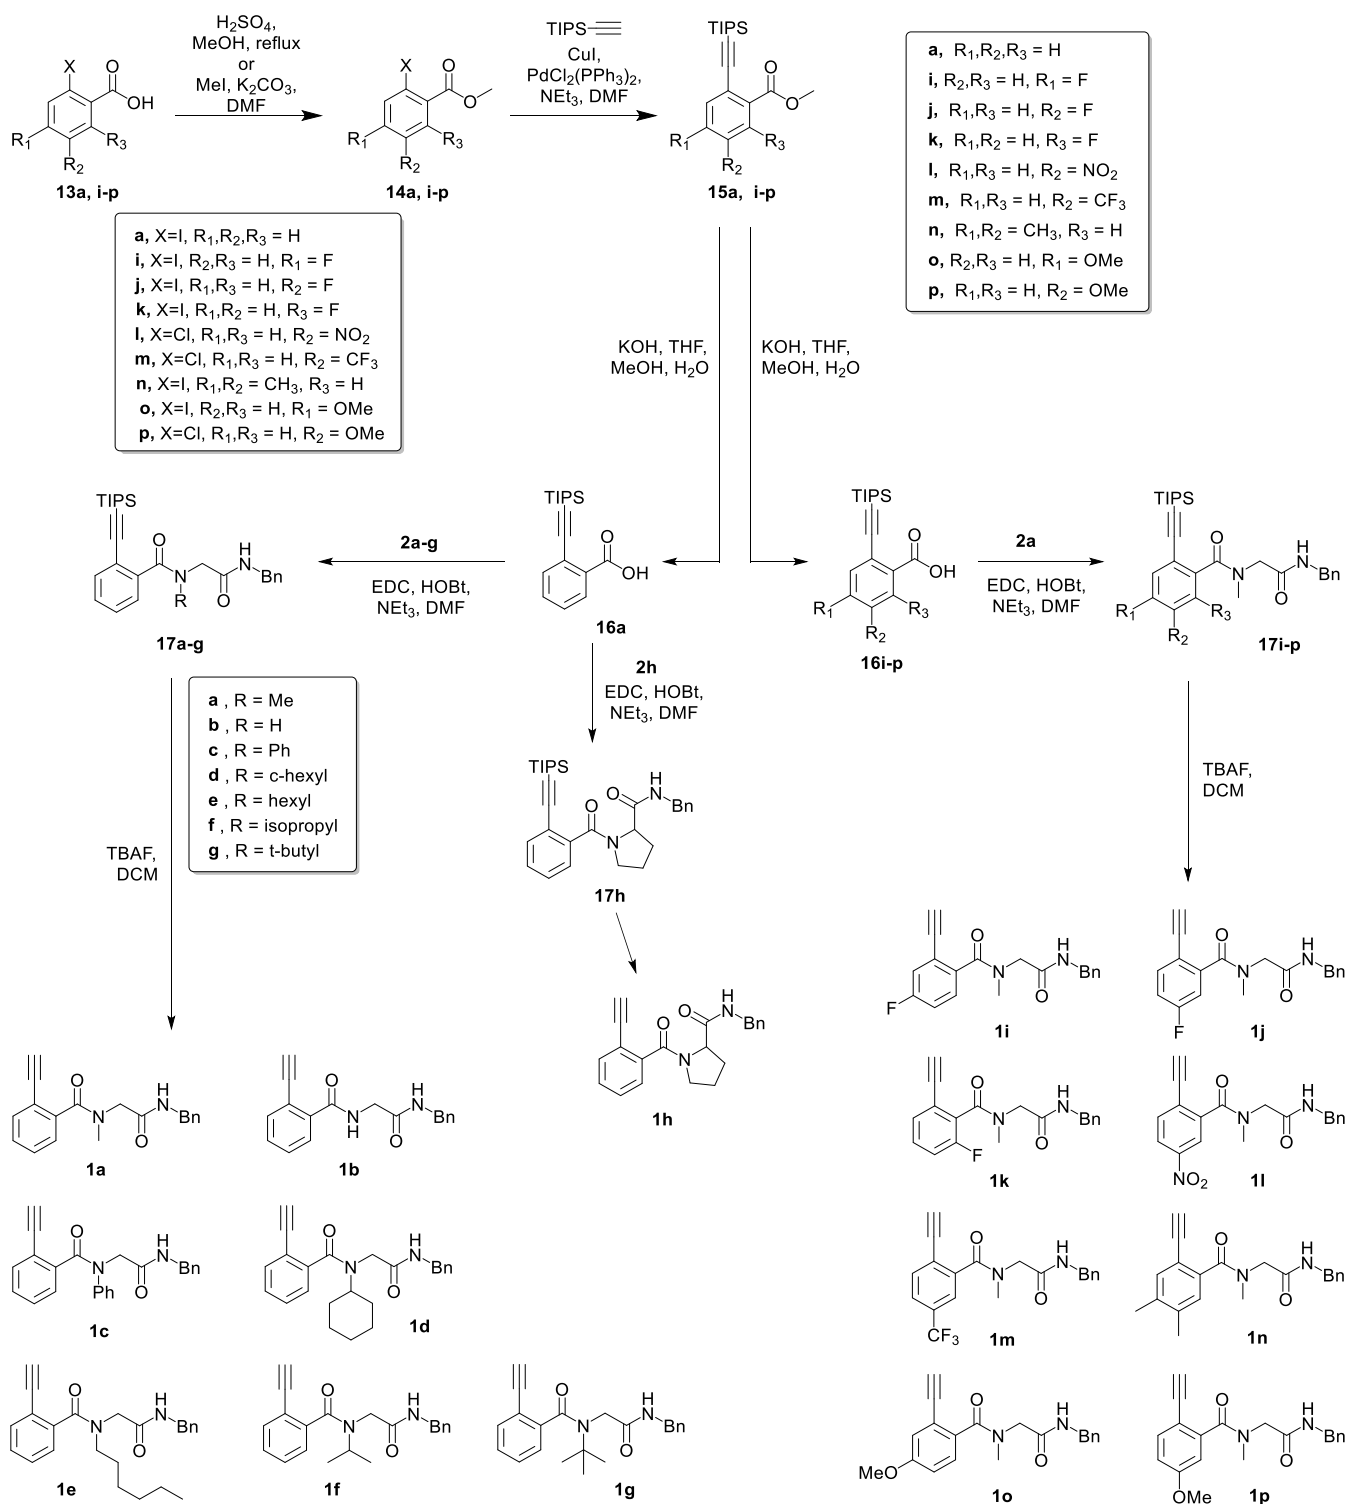

**Scheme S5.** Synthesis of **1a-p**

Preparation of **14a** :

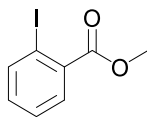

2-Iodobenzoic acid **13a** (1 g, 4.03 mmol) was dissolved in MeOH (20 ml). Sulfuric acid (2.7 ml) was then slowly added and the mixture was stirred for 16 hr and heated at reflux under N<sub>2</sub>. To workup, the reaction was cooled to room temperature, before diluting with ether. The organic layer was then washed with H<sub>2</sub>O, brine, dried over magnesium sulfate, and evaporated under vacuum to give the desired pure compound. Yield: 847 mg, 80%. Characterization matched a previous report of this known compound.<sup>5</sup> <sup>1</sup>H NMR (CDCl<sub>3</sub>, 300 MHz) δ 8.00 (dd, *J* = 1.0, 7.9 Hz, 1H), 7.80 (dd, *J* = 1.7, 7.8 Hz, 1H), 7.40 (td, *J* = 1.1, 7.6 Hz, 1H), 7.15 (td, *J* = 1.7, 7.7 Hz, 1H), 3.93 (s, 3H).

Preparation of **14i** :

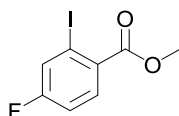

4-Fluoro-2-iodobenzoic acid **13i** (300 mg, 1.13 mmol) and K<sub>2</sub>CO<sub>3</sub> (234 mg, 1.69 mmol) were dissolved in DMF (10 ml) and stirred for 5 min. CH<sub>3</sub>I (105 μl, 1.69 mmol) was then added and the mixture was stirred for 16 hr at room temperature under N<sub>2</sub>. To workup, the reaction was diluted with EtOAc and then the organic layer was washed with H<sub>2</sub>O, brine, dried over sodium sulfate, and evaporated under vacuum to give the desired pure compound. Yield: 300 mg, quan. *R*<sub>f</sub>=0.58 (EtOAc/Hex, 1:4). Characterization matched a previous report of this known compound.<sup>6</sup> <sup>1</sup>H NMR (CDCl<sub>3</sub>, 300 MHz) δ 7.86 (dd, *J* = 5.9, 8.8 Hz, 1H), 7.72 (dd, *J* = 2.5, 8.2 Hz, 1H), 7.11 (td, *J* = 2.6, 8.7 Hz, 1H), 3.91 (s, 3H).

Preparation of **14j** :

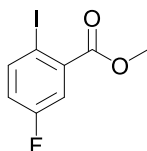

5-Fluoro-2-iodobenzoic acid **13j** (300 mg, 1.13 mmol) and K<sub>2</sub>CO<sub>3</sub> (234 mg, 1.69 mmol) were dissolved in DMF (10 ml) and stirred for 5 min. CH<sub>3</sub>I (105 μl, 1.69 mmol) was then added and the mixture was stirred for 16 hr at room temperature under N<sub>2</sub>. To workup, the reaction was diluted with EtOAc and then the organic layer was washed with H<sub>2</sub>O, brine, dried over sodium sulfate, and evaporated under vacuum to give the desired pure compound. Yield: 300 mg, quan. *R*<sub>f</sub>=0.60 (EtOAc/Hex, 1:4). Characterization matched a previous report of this known compound.<sup>7</sup> <sup>1</sup>H NMR (CDCl<sub>3</sub>, 300 MHz) δ 7.94 (dd, *J* = 5.4, 8.7 Hz, 1H), 7.54 (dd, *J* = 3.0, 9.0 Hz, 1H), 6.94 (td, *J* = 3.0, 7.8 Hz, 1H), 3.94 (s, 3H).

Preparation of **14k** :

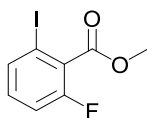

6-Fluoro-2-iodobenzoic acid **13k** (300 mg, 1.13 mmol) and K<sub>2</sub>CO<sub>3</sub> (234 mg, 1.69 mmol) were dissolved in DMF (10 ml) and stirred for 5 min. CH<sub>3</sub>I (105 μl, 1.69 mmol) was then added and the mixture was stirred for 16 hr at room temperature under N<sub>2</sub>. To workup, the reaction was diluted with EtOAc and then the organic layer was washed with H<sub>2</sub>O, brine, dried over sodium sulfate, and evaporated under vacuum to give the desired pure compound. Yield: 299 mg, quan. *R*<sub>f</sub>=0.59 (EtOAc/Hex, 1:4). Characterization matched a previous report of this known compound.<sup>8</sup> <sup>1</sup>H NMR (CDCl<sub>3</sub>, 300 MHz) δ 7.68-7.61 (m, 1H), 7.13-7.09 (m, 2H), 3.98 (s, 3H).

Preparation of **14l** :

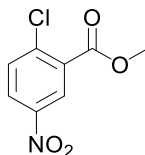

5-Nitro-2-chlorobenzoic acid **13l** (216 mg, 1.07 mmol) and  $K_2CO_3$  (222 mg, 1.61 mmol) were dissolved in DMF (10 ml) and stirred for 5 min.  $CH_3I$  (100  $\mu$ l, 1.61 mmol) was then added and the mixture was stirred for 16 hr at room temperature under  $N_2$ . To workup, the reaction was diluted with EtOAc and then the organic layer was washed with  $H_2O$ , brine, dried over sodium sulfate, and evaporated under vacuum to give the desired pure compound. Yield: 230 mg, quan.  $R_f=0.58$  (EtOAc/Hex, 1:4). Characterization matched a previous report of this known compound.<sup>9</sup>  $^1H$  NMR ( $CDCl_3$ , 300 MHz)  $\delta$  8.74-8.72 (m, 1H), 8.31-8.26 (m, 1H), 7.67 (dd,  $J = 3.5, 8.8$  Hz, 1H), 4.00 (s, 3H).

Preparation of **14m** :

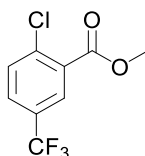

5-trifluoromethyl-2-chlorobenzoic acid **13m** (295 mg, 1.31 mmol) and  $K_2CO_3$  (272 mg, 1.97 mmol) were dissolved in DMF (10 ml) and stirred for 5 min.  $CH_3I$  (123  $\mu$ l, 1.97 mmol) was then added and the mixture was stirred for 16 hr at room temperature under  $N_2$ . To workup, the reaction was diluted with EtOAc and then the organic layer was washed with  $H_2O$ , brine, dried over sodium sulfate, and evaporated under vacuum to give the desired pure compound. Yield: 313 mg, quan.  $R_f=0.67$  (EtOAc/Hex, 1:10). Characterization matched a previous report of this known compound.<sup>10</sup>  $^1H$  NMR ( $CDCl_3$ , 300 MHz)  $\delta$  8.11 (s, 1H), 7.69-7.58 (m, 2H), 3.97 (s, 3H).

Preparation of **14n** :

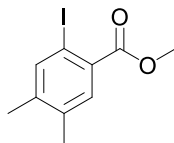

4,5-Dimethyl-2-iodobenzoic acid **13n** (300 mg, 1.09 mmol) and  $K_2CO_3$  (225 mg, 1.63 mmol) were dissolved in DMF (10 ml) and stirred for 5 min.  $CH_3I$  (101  $\mu$ l, 1.63 mmol) was then added and the mixture was stirred for 16 hr at room temperature under  $N_2$ . To workup, the reaction was diluted with EtOAc and then the organic layer was washed with  $H_2O$ , brine, dried over sodium sulfate, and evaporated under vacuum to give the desired pure compound. Yield: 299 mg, quan.  $R_f=0.60$  (EtOAc/Hex, 1:4). Characterization matched a previous report of this known compound.<sup>11</sup>  $^1H$  NMR ( $CDCl_3$ , 300 MHz)  $\delta$  7.77 (s, 1H), 7.62 (s, 1H), 3.91 (s, 3H), 2.23 (s, 6H).

Preparation of **14o** :

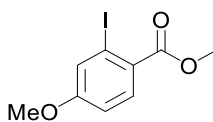

4-Methoxy-2-iodobenzoic acid **13o** (112 mg, 0.403 mmol) was dissolved in MeOH (2 ml). Sulfuric acid (270  $\mu$ l) was then slowly added and the mixture was stirred for 16 hr and heated at reflux under  $N_2$ . To workup, the reaction was cooled to room temperature, before diluting with ether. The organic layer was then washed with  $H_2O$ , brine, dried over magnesium sulfate, and evaporated under vacuum to give the desired pure compound. Yield: 111 mg, quan.  $R_f=0.25$  (EtOAc/Hex, 1:10).  $^1H$  NMR ( $CDCl_3$ , 300 MHz)  $\delta$  7.89-7.84 (m, 1H), 7.55-7.52 (m, 1H), 6.94-6.88 (m, 1H), 3.90 (s, 3H), 3.84 (s, 3H);  $^{13}C$  NMR ( $CDCl_3$ , 75 MHz):  $\delta$  166.3, 162.3, 132.8, 127.2, 126.3, 113.8, 95.8, 55.7, 52.3. HRMS for  $C_9H_9IO_3$   $[M+H]^+$  calcd. 292.9669, found 292.9673.



Preparation of **14p** :

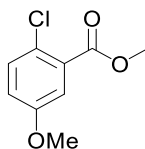

5-Methoxy-2-chlorobenzoic acid **13p** (285 mg, 1.53 mmol) and  $K_2CO_3$  (317 mg, 2.29 mmol) were dissolved in DMF (10 ml) and stirred for 5 min.  $CH_3I$  (143  $\mu$ l, 2.29 mmol) was then added and the mixture was stirred for 16 hr at room temperature under  $N_2$ . To workup, the reaction was diluted with EtOAc and then the organic layer was washed with  $H_2O$ , brine, dried over sodium sulfate, and evaporated under vacuum to give the desired pure compound. Yield: 306 mg, quan.  $R_f=0.26$  (EtOAc/Hex, 1:10). Characterization matched a previous report of this known compound.<sup>12</sup>  $^1H$  NMR ( $CDCl_3$ , 300 MHz)  $\delta$  7.35-7.32 (m, 2H), 6.96 (dd,  $J = 2.9, 8.8$  Hz, 1H), 3.93 (s, 3H), 3.82 (s, 3H).

Preparation of **15a** :

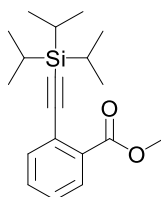

Compound **14a** (400 mg, 1.53 mmol), CuI (58 mg, 0.31 mmol), and  $PdCl_2(PPh_3)_2$  (107 mg, 0.15 mmol) were dissolved in DMF (2 ml) and  $NEt_3$  (2 ml). The mixture was degassed with  $N_2$  for 5 min. (Triisopropylsilyl)acetylene (680  $\mu$ l, 3.05 mmol) was then added and the mixture was stirred for 16 hr at  $30^\circ C$  under  $N_2$ . To workup, the reaction was diluted with EtOAc and then the organic layer was washed with  $H_2O$ , brine, dried over sodium sulfate, and evaporated under vacuum. Flash column chromatography using a gradient of 0-5% EtOAc in Hex was used to purify the desired compound. Yield: 474 mg, 98%.  $R_f=0.70$  (EtOAc/Hex, 1:5).  $^1H$  NMR ( $CDCl_3$ , 300 MHz)  $\delta$  7.89 (dd,  $J = 1.3, 7.6$  Hz, 1H), 7.60 (dd,  $J = 1.2, 7.8$  Hz, 1H), 7.44 (td,  $J = 1.4, 7.5$  Hz, 1H), 7.36 (td,  $J = 1.4, 7.7$  Hz, 1H), 3.91 (s, 3H), 1.15 (s, 21H);  $^{13}C$  NMR ( $CDCl_3$ , 75 MHz):  $\delta$  167.5, 135.2, 132.8, 131.6, 130.4, 128.2, 123.6, 105.3, 96.5, 52.3, 18.7, 11.4. HRMS for  $C_{19}H_{28}O_2Si$   $[M+H]^+$  calcd. 317.1931, found 317.1935.

Preparation of **15i** :

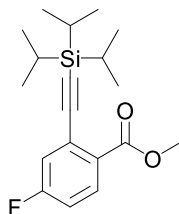

Compound **14i** (303 mg, 1.08 mmol), CuI (41 mg, 0.217 mmol), and  $PdCl_2(PPh_3)_2$  (76 mg, 0.108 mmol) were dissolved in DMF (2 ml) and  $NEt_3$  (2 ml). The mixture was degassed with  $N_2$  for 5 min. (Triisopropylsilyl)acetylene (482  $\mu$ l, 2.17 mmol) was then added and the mixture was stirred for 16 hr at  $30^\circ C$  under  $N_2$ . To workup, the reaction was diluted with EtOAc and then the organic layer was washed with  $H_2O$ , brine, dried over sodium sulfate, and evaporated under vacuum. Flash column chromatography using a gradient of 0-5% EtOAc in Hex was used to purify the desired compound. Yield: 350 mg, 96%.  $R_f=0.34$  (EtOAc/Hex, 1:10).  $^1H$  NMR ( $CDCl_3$ , 300 MHz)  $\delta$  7.94 (dd,  $J = 5.8, 8.8$  Hz, 1H), 7.28-7.25 (m, 2H), 7.06 (td,  $J = 2.6, 7.8$  Hz, 1H), 3.90 (s, 3H), 1.15 (s, 21H);  $^{13}C$  NMR ( $CDCl_3$ , 75 MHz):  $\delta$  166.4, 166.0, 162.7, 133.2, 133.1, 121.9, 121.6, 115.9, 115.6, 104.0, 98.3, 52.3, 18.7, 11.3. HRMS for  $C_{19}H_{27}FO_2Si$   $[M+H]^+$  calcd. 335.1837, found 335.1841.

Preparation of **15j** :

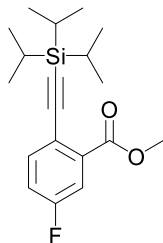

Compound **14j** (303 mg, 1.08 mmol), CuI (41 mg, 0.217 mmol), and PdCl<sub>2</sub>(PPh<sub>3</sub>)<sub>2</sub> (76 mg, 0.108 mmol) were dissolved in DMF (2 ml) and NEt<sub>3</sub> (2 ml). The mixture was degassed with N<sub>2</sub> for 5 min. (Triisopropylsilyl)acetylene (482  $\mu$ l, 2.17 mmol) was then added and the mixture was stirred for 16 hr at 30°C under N<sub>2</sub>. To workup, the reaction was diluted with EtOAc and then the organic layer was washed with H<sub>2</sub>O, brine, dried over sodium sulfate, and evaporated under vacuum. Flash column chromatography using a gradient of 0-5% EtOAc in Hex was used to purify the desired compound. Yield: 318 mg, 88%. *R*<sub>f</sub>=0.44 (EtOAc/Hex, 1:10). <sup>1</sup>H NMR (CDCl<sub>3</sub>, 300 MHz)  $\delta$  7.61-7.56 (m, 2H), 7.18-7.12 (m, 1H), 3.92 (s, 3H), 1.14 (s, 21H); <sup>13</sup>C NMR (CDCl<sub>3</sub>, 75 MHz):  $\delta$  166.2, 163.6, 160.3, 137.2, 137.1, 119.2, 118.9, 117.6, 117.3, 104.2, 96.3, 52.6, 18.7, 11.4. HRMS for C<sub>19</sub>H<sub>27</sub>FO<sub>2</sub>Si [M+H]<sup>+</sup> calcd. 335.1837, found 335.1840.

Preparation of **15k** :

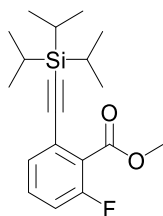

Compound **14k** (303 mg, 1.08 mmol), CuI (41 mg, 0.217 mmol), and PdCl<sub>2</sub>(PPh<sub>3</sub>)<sub>2</sub> (76 mg, 0.108 mmol) were dissolved in DMF (2 ml) and NEt<sub>3</sub> (2 ml). The mixture was degassed with N<sub>2</sub> for 5 min. (Triisopropylsilyl)acetylene (482  $\mu$ l, 2.17 mmol) was then added and the mixture was stirred for 16 hr at 30°C under N<sub>2</sub>. To workup, the reaction was diluted with EtOAc and then the organic layer was washed with H<sub>2</sub>O, brine, dried over sodium sulfate, and evaporated under vacuum. Flash column chromatography using a gradient of 0-5% EtOAc in Hex was used to purify the desired compound. Yield: 320 mg, 89%. *R*<sub>f</sub>=0.38 (EtOAc/Hex, 1:10). <sup>1</sup>H NMR (CDCl<sub>3</sub>, 300 MHz)  $\delta$  7.37-7.29 (m, 2H), 7.12-7.03 (m, 1H), 3.93 (s, 3H), 1.12 (s, 21H); <sup>13</sup>C NMR (CDCl<sub>3</sub>, 75 MHz):  $\delta$  165.1, 161.2, 157.9, 131.4, 131.3, 129.2(2), 116.4, 116.1, 102.8, 96.7, 52.8, 18.6, 11.2. HRMS for C<sub>19</sub>H<sub>27</sub>FO<sub>2</sub>Si [M+H]<sup>+</sup> calcd. 335.1837, found 335.1841.

Preparation of **15l** :

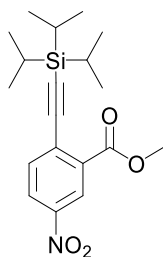

Compound **14l** (200 mg, 0.930 mmol), CuI (35 mg, 0.186 mmol), and PdCl<sub>2</sub>(PPh<sub>3</sub>)<sub>2</sub> (65 mg, 0.093 mmol) were dissolved in DMF (2 ml) and NEt<sub>3</sub> (2 ml). The mixture was degassed with N<sub>2</sub> for 5 min. (Triisopropylsilyl)acetylene (414  $\mu$ l, 1.86 mmol) was then added and the mixture was stirred for 16 hr at 30°C under N<sub>2</sub>. To workup, the reaction was diluted with EtOAc and then the organic layer was washed with H<sub>2</sub>O, brine, dried over sodium sulfate, and evaporated under vacuum. Flash column chromatography using a gradient of 0-5% EtOAc in Hex was used to purify the desired compound. Yield: 337 mg, 94%. *R*<sub>f</sub>=0.37 (EtOAc/Hex, 1:10). <sup>1</sup>H NMR (CDCl<sub>3</sub>, 300 MHz)  $\delta$  8.76 (d, *J* = 2.3 Hz, 1H), 8.28 (dd, *J* = 2.5, 8.6 Hz, 1H), 7.75 (d, *J* = 8.5 Hz, 1H), 3.97 (s, 3H), 1.16 (s, 21H); <sup>13</sup>C NMR (CDCl<sub>3</sub>, 75 MHz):  $\delta$  165.1, 146.7, 136.2, 133.9, 130.0, 125.9, 125.8, 104.4, 103.4, 52.9, 18.7, 11.3. HRMS for C<sub>19</sub>H<sub>27</sub>NO<sub>4</sub>Si [M+Na]<sup>+</sup> calcd. 384.1602, found 384.1605.

Preparation of **15m** :

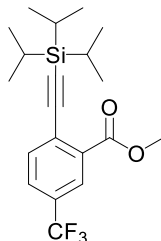

Compound **14m** (282 mg, 1.18 mmol), CuI (45 mg, 0.236 mmol), and PdCl<sub>2</sub>(PPh<sub>3</sub>)<sub>2</sub> (83 mg, 0.118 mmol) were dissolved in DMF (2 ml) and NEt<sub>3</sub> (2 ml). The mixture was degassed with N<sub>2</sub> for 5 min. (Triisopropylsilyl)acetylene (526  $\mu$ l, 2.36 mmol) was then added and the mixture was stirred for 16 hr at 30°C under N<sub>2</sub>. To workup, the reaction was diluted with EtOAc and then the organic layer was washed with H<sub>2</sub>O, brine, dried over sodium sulfate, and evaporated under vacuum. Flash column chromatography using a gradient of 0-5% EtOAc in Hex was used to purify the desired compound. Yield: 148 mg, 33%. *R*<sub>f</sub>=0.43 (EtOAc/Hex, 1:10). <sup>1</sup>H NMR (CDCl<sub>3</sub>, 300 MHz)  $\delta$  8.17 (s, 1H), 7.72-7.65 (m, 2H), 3.94 (s, 3H), 1.16 (s, 21H); <sup>13</sup>C NMR (CDCl<sub>3</sub>, 75 MHz):  $\delta$  166.1, 135.7, 133.3, 130.4, 129.9, 128.1, 128.0, 127.6, 127.5, 103.9, 100.4, 52.6, 18.7, 11.3. HRMS for C<sub>20</sub>H<sub>27</sub>F<sub>3</sub>O<sub>2</sub>Si [M+Na]<sup>+</sup> calcd. 407.1625, found 407.1629.

Preparation of **15n** :

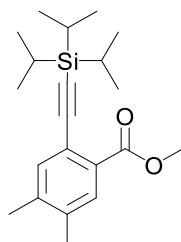

Compound **14n** (291 mg, 1.00 mmol), CuI (38 mg, 0.201 mmol), and PdCl<sub>2</sub>(PPh<sub>3</sub>)<sub>2</sub> (71 mg, 0.100 mmol) were dissolved in DMF (2 ml) and NEt<sub>3</sub> (2 ml). The mixture was degassed with N<sub>2</sub> for 5 min. (Triisopropylsilyl)acetylene (446  $\mu$ l, 2.01 mmol) was then added and the mixture was stirred for 16 hr at 30°C under N<sub>2</sub>. To workup, the reaction was diluted with EtOAc and then the organic layer was washed with H<sub>2</sub>O, brine, dried over sodium sulfate, and evaporated under vacuum. Flash column chromatography using a gradient of 0-5% EtOAc in Hex was used to purify the desired compound. Yield: 337 mg, 97%. *R*<sub>f</sub>=0.49 (EtOAc/Hex, 1:10). <sup>1</sup>H NMR (CDCl<sub>3</sub>, 300 MHz)  $\delta$  7.70 (s, 1H), 7.37 (s, 1H), 3.90 (s, 3H), 2.29 (s, 3H), 2.28 (s, 3H), 1.16 (s, 21H); <sup>13</sup>C NMR (CDCl<sub>3</sub>, 75 MHz):  $\delta$  167.6, 141.0, 137.3, 136.2, 131.7, 130.0, 121.0, 105.8, 94.8, 52.1, 19.6, 19.5, 18.7, 11.4. HRMS for C<sub>21</sub>H<sub>32</sub>O<sub>2</sub>Si [M+H]<sup>+</sup> calcd. 345.2244, found 345.2248.

Preparation of **15o** :

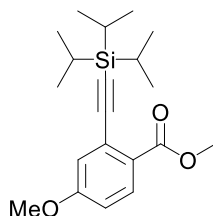

Compound **14o** (304 mg, 1.04 mmol), CuI (40 mg, 0.208 mmol), and PdCl<sub>2</sub>(PPh<sub>3</sub>)<sub>2</sub> (73 mg, 0.104 mmol) were dissolved in DMF (2 ml) and NEt<sub>3</sub> (2 ml). The mixture was degassed with N<sub>2</sub> for 5 min. (Triisopropylsilyl)acetylene (463  $\mu$ l, 2.08 mmol) was then added and the mixture was stirred for 16 hr at 30°C under N<sub>2</sub>. To workup, the reaction was diluted with EtOAc and then the organic layer was washed with H<sub>2</sub>O, brine, dried over sodium sulfate, and evaporated under vacuum. Flash column chromatography using a gradient of 0-5% EtOAc in Hex was used to purify the desired compound. Yield: 321 mg, 89%. *R*<sub>f</sub>=0.59 (EtOAc/Hex, 1:4). <sup>1</sup>H NMR (CDCl<sub>3</sub>, 300 MHz)  $\delta$  7.91 (d, *J* = 8.8 Hz, 1H), 7.07 (d, *J* = 2.7 Hz, 1H), 6.87 (dd, *J* = 2.7, 8.8 Hz, 1H), 3.88 (s, 3H), 3.85 (s, 3H), 1.16 (s, 21H); <sup>13</sup>C NMR (CDCl<sub>3</sub>, 75 MHz):  $\delta$  166.9, 162.0, 132.8, 125.6, 124.9, 120.0, 114.2, 105.4, 96.4, 55.6, 52.0, 18.7, 11.4. HRMS for C<sub>20</sub>H<sub>30</sub>O<sub>3</sub>Si [M+Na]<sup>+</sup> calcd. 369.1856, found 369.1860.

Preparation of **15p** :

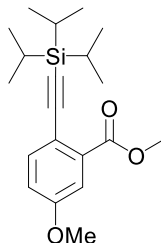

Compound **14p** (225 mg, 1.12 mmol), XPhos (107 mg, 0.224 mmol), PdCl<sub>2</sub>(CH<sub>3</sub>CN)<sub>2</sub> (29 mg, 0.112 mmol), and CsCO<sub>3</sub> (914 mg, 2.80 mmol) were dissolved in DMF (5 ml). The mixture was degassed with N<sub>2</sub> for 5 min. (Triisopropylsilyl)acetylene (500  $\mu$ l, 2.24 mmol) was then added and the mixture was stirred for 16 hr at 90°C under N<sub>2</sub>. To workup, the reaction was diluted with EtOAc and then the organic layer was washed with H<sub>2</sub>O, brine, dried over sodium sulfate, and evaporated under vacuum. Flash column chromatography using a gradient of 0-5% EtOAc in Hex was used to purify the desired compound. Yield: 379 mg, 97%. *R*<sub>f</sub>=0.63 (EtOAc/Hex, 1:4). <sup>1</sup>H NMR (CDCl<sub>3</sub>, 300 MHz)  $\delta$  7.53 (d, *J* = 8.6 Hz, 1H), 7.41 (d, *J* = 2.8 Hz, 1H), 6.99 (dd, *J* = 2.9, 8.6 Hz, 1H), 3.92 (s, 3H), 3.86 (s, 3H), 1.15 (s, 21H); <sup>13</sup>C NMR (CDCl<sub>3</sub>, 75 MHz):  $\delta$  167.4, 159.4, 136.6, 134.2, 118.3, 115.9, 114.8, 105.3, 94.2, 55.7, 52.3, 18.7, 11.4. HRMS for C<sub>20</sub>H<sub>30</sub>O<sub>3</sub>Si [M+Na]<sup>+</sup> calcd. 369.1856, found 369.1860.

Preparation of **16a** :

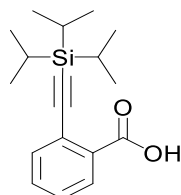

Compound **15a** (265 mg, 0.839 mmol) was dissolved in MeOH (3 ml) and THF (3 ml) at 0°C. KOH (471 mg, 8.39 mmol) dissolved in H<sub>2</sub>O (3 ml) was then added and the mixture was stirred for 3 hr at rt under N<sub>2</sub>. To workup, the mixture was acidified to pH~3 with 1M HCl solution, which allowed the product to be extracted with EtOAc. The organic layer was washed with H<sub>2</sub>O, brine, dried over sodium sulfate, and evaporated under vacuum. Flash column chromatography using a gradient of 10-25% EtOAc in Hex was used to purify the desired compound. Yield: 265 mg, quan. *R*<sub>f</sub>=0.73 (EtOAc/Hex, 1:1). <sup>1</sup>H NMR (CDCl<sub>3</sub>, 300 MHz)  $\delta$  8.07 (d, *J* = 7.8 Hz, 1H), 7.64 (d, *J* = 7.7 Hz, 1H), 7.51 (td, *J* = 1.3, 7.5 Hz, 1H), 7.41 (td, *J* = 1.4, 7.8 Hz, 1H), 1.16 (s, 21H); <sup>13</sup>C NMR (CDCl<sub>3</sub>, 75 MHz):  $\delta$  170.8, 135.2, 132.5, 131.5, 131.3, 128.4, 124.2, 104.8, 98.7, 18.7, 11.4; HRMS for C<sub>18</sub>H<sub>26</sub>O<sub>2</sub>Si [M+H]<sup>+</sup> calcd. 303.1775, found 303.1776.

Preparation of **16i** :

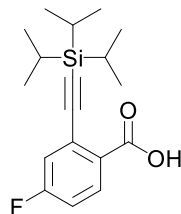

Compound **15i** (361 mg, 1.08 mmol) was dissolved in MeOH (6 ml) and THF (6 ml) at 0°C. KOH (607 mg, 10.83 mmol) dissolved in H<sub>2</sub>O (6 ml) was then added and the mixture was stirred for 3 hr at rt under N<sub>2</sub>. To workup, the mixture was acidified to pH~3 with 1M HCl solution, which allowed the product to be extracted with EtOAc. The organic layer was washed with H<sub>2</sub>O, brine, dried over sodium sulfate, and evaporated under vacuum. Flash column chromatography using a gradient of 0-20% EtOAc in Hex was used to purify the desired compound. Yield: 292 mg, 84%. *R*<sub>f</sub>=0.21 (EtOAc/Hex, 1:4). <sup>1</sup>H NMR (CDCl<sub>3</sub>, 300 MHz)  $\delta$  8.09 (dd, *J* = 5.8, 8.8 Hz, 1H), 7.33-7.29 (m, 2H), 7.10 (td, *J* = 2.6, 8.7 Hz, 1H), 1.15 (s, 21H); <sup>13</sup>C NMR (CDCl<sub>3</sub>, 75 MHz):  $\delta$  170.0, 166.7, 163.3, 134.0, 133.9, 122.1, 121.8, 116.0, 115.7, 103.6, 100.3, 18.6, 11.3. HRMS for C<sub>18</sub>H<sub>25</sub>FO<sub>2</sub>Si [M+Na]<sup>+</sup> calcd. 343.1500, found 343.1508.

Preparation of **16j** :

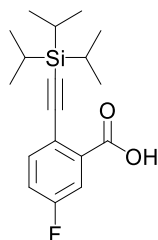

Compound **15j** (361 mg, 1.08 mmol) was dissolved in MeOH (6 ml) and THF (6 ml) at 0°C. KOH (607 mg, 10.83 mmol) dissolved in H<sub>2</sub>O (6 ml) was then added and the mixture was stirred for 2.5 hr at rt under N<sub>2</sub>. To workup, the mixture was acidified to pH~3 with 1M HCl solution, which allowed the product to be extracted with EtOAc. The organic layer was washed with H<sub>2</sub>O, brine, dried over sodium sulfate, and evaporated under vacuum. Flash column chromatography using a gradient of 10-25% EtOAc in Hex was used to purify the desired compound. Yield: 300 mg, 87%. *R<sub>f</sub>*=0.25 (EtOAc/Hex, 1:4). <sup>1</sup>H NMR (CDCl<sub>3</sub>, 300 MHz) δ 7.78 (dd, *J* = 2.7, 9.1 Hz, 1H), 7.63 (dd, *J* = 5.4, 8.6 Hz, 1H), 7.25-7.20 (m, 1H), 1.15 (s, 21H); <sup>13</sup>C NMR (CDCl<sub>3</sub>, 75 MHz): δ 165.9, 160.4, 137.1, 137.0, 120.3, 120.0, 118.6, 118.3, 102.8, 99.3, 18.6, 11.3. HRMS for C<sub>18</sub>H<sub>25</sub>FO<sub>2</sub>Si [M+Na]<sup>+</sup> calcd. 343.1500, found 343.1501.

Preparation of **16k** :

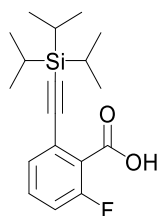

Compound **15k** (361 mg, 1.08 mmol) was dissolved in MeOH (6 ml) and THF (6 ml) at 0°C. KOH (607 mg, 10.83 mmol) dissolved in H<sub>2</sub>O (6 ml) was then added and the mixture was stirred for 3 hr at 50°C under N<sub>2</sub>. To workup, the mixture was acidified to pH~3 with 1M HCl solution, which allowed the product to be extracted with EtOAc. The organic layer was washed with H<sub>2</sub>O, brine, dried over sodium sulfate, and evaporated under vacuum. Flash column chromatography using a gradient of 10-25% EtOAc in Hex was used to purify the desired compound. Yield: 251 mg, 72%. *R<sub>f</sub>*=0.11 (EtOAc/Hex, 1:4). <sup>1</sup>H NMR (CDCl<sub>3</sub>, 300 MHz) δ 7.42-7.35 (m, 2H), 7.14-7.08 (m, 1H), 1.12 (s, 1H); <sup>13</sup>C NMR (CDCl<sub>3</sub>, 75 MHz): δ 161.7, 158.4, 132.1, 132.0, 129.5(2), 116.6, 116.3, 102.6, 98.0, 18.6, 11.3. HRMS for C<sub>18</sub>H<sub>25</sub>FO<sub>2</sub>Si [M+Na]<sup>+</sup> calcd. 343.1500, found 343.1502.

Preparation of **16l** :

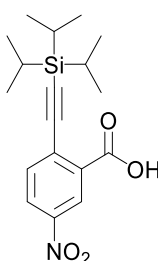

Compound **15l** (337 mg, 0.878 mmol) was dissolved in MeOH (6 ml) and THF (6 ml) at 0°C. KOH (492 mg, 8.78 mmol) dissolved in H<sub>2</sub>O (6 ml) was then added and the mixture was stirred for 1 hr at rt under N<sub>2</sub>. To workup, the mixture was acidified to pH~3 with 1M HCl solution, which allowed the product to be extracted with EtOAc. The organic layer was washed with H<sub>2</sub>O, brine, dried over sodium sulfate, and evaporated under vacuum. Flash column chromatography using a gradient of 25-50% EtOAc in Hex was used to purify the desired compound. Yield: 296 mg, 97%. *R<sub>f</sub>*=0.33 (EtOAc/Hex, 1:1). <sup>1</sup>H NMR (CDCl<sub>3</sub>, 300 MHz) δ 8.75 (s, 1H), 8.16 (d, *J* = 8.0 Hz, 1H), 7.65 (d, *J* = 8.5 Hz, 1H), 1.04 (s, 21H). <sup>13</sup>C NMR (CDCl<sub>3</sub>, 75 MHz): δ 146.6, 136.4, 130.2, 126.3, 126.2, 125.5(2), 104.6, 104.3, 58.8, 18.6, 11.3. HRMS for C<sub>18</sub>H<sub>25</sub>NO<sub>4</sub>Si [M+Na]<sup>+</sup> calcd. 370.1445, found 370.1449.

Preparation of **16m** :

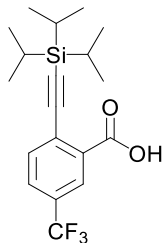

Compound **15m** (148 mg, 0.385 mmol) was dissolved in MeOH (6 ml) and THF (6 ml) at 0°C. KOH (216 mg, 3.85 mmol) dissolved in H<sub>2</sub>O (6 ml) was then added and the mixture was stirred for 2.5 hr at rt under N<sub>2</sub>. To workup, the mixture was acidified to pH~3 with 1M HCl solution, which allowed the product to be extracted with EtOAc. The organic layer was washed with H<sub>2</sub>O, brine, dried over sodium sulfate, and evaporated under vacuum. Flash column chromatography using a gradient of 25-50% EtOAc in Hex was used to purify the desired compound. Yield: 85 mg, 59%. *R*<sub>f</sub>=0.59 (EtOAc/Hex, 1:1). <sup>1</sup>H NMR (CDCl<sub>3</sub>, 300 MHz) δ 8.30 (s, 1H), 7.75 (s, 2H), 1.15 (s, 21H); <sup>13</sup>C NMR (CDCl<sub>3</sub>, 75 MHz): δ 169.6, 135.8, 131.9, 130.5, 130.1, 129.0, 128.2, 128.0, 103.5, 102.5, 18.6, 11.3. HRMS for C<sub>19</sub>H<sub>25</sub>F<sub>3</sub>O<sub>2</sub>Si [M+Na]<sup>+</sup> calcd. 393.1468, found 393.1474.

Preparation of **16n** :

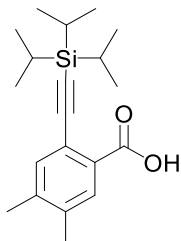

Compound **15n** (338 mg, 0.982 mmol) was dissolved in MeOH (6 ml) and THF (6 ml) at 0°C. KOH (551 mg, 9.82 mmol) dissolved in H<sub>2</sub>O (6 ml) was then added and the mixture was stirred for 2 hr at 50°C under N<sub>2</sub>. To workup, the mixture was acidified to pH~3 with 1M HCl solution, which allowed the product to be extracted with EtOAc. The organic layer was washed with H<sub>2</sub>O, brine, dried over sodium sulfate, and evaporated under vacuum. Flash column chromatography using a gradient of 10-20% EtOAc in Hex was used to purify the desired compound. Yield: 320 mg, quan. *R*<sub>f</sub>=0.33 (EtOAc/Hex, 1:5). <sup>1</sup>H NMR (CDCl<sub>3</sub>, 300 MHz) δ 7.87 (s, 1H), 7.38 (s, 1H), 2.31 (s, 3H), 2.29 (s, 3H), 1.15 (s, 21H); <sup>13</sup>C NMR (CDCl<sub>3</sub>, 75 MHz): δ 169.6, 142.2, 137.9, 136.0, 132.6, 128.8, 120.9, 105.2, 98.0, 19.7, 19.6, 18.7, 11.4. HRMS for C<sub>20</sub>H<sub>30</sub>O<sub>2</sub>Si [M+H]<sup>+</sup> calcd. 331.2088, found 331.2080.

Preparation of **16o** :

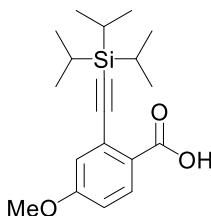

Compound **15o** (360 mg, 1.04 mmol) was dissolved in MeOH (6 ml) and THF (6 ml) at 0°C. KOH (584 mg, 10.41 mmol) dissolved in H<sub>2</sub>O (6 ml) was then added and the mixture was stirred for 5 hr at rt under N<sub>2</sub>. To workup, the mixture was acidified to pH~3 with 1M HCl solution, which allowed the product to be extracted with EtOAc. The organic layer was washed with H<sub>2</sub>O, brine, dried over sodium sulfate, and evaporated under vacuum. Flash column chromatography using a gradient of 0-50% EtOAc in Hex was used to purify the desired compound. Yield: 276 mg, 80%. *R*<sub>f</sub>=0.26 (EtOAc/Hex, 1:4). <sup>1</sup>H NMR (CDCl<sub>3</sub>, 300 MHz) δ 8.05 (d, *J* = 8.8 Hz, 1H), 7.08 (d, *J* = 2.3 Hz, 1H), 6.89 (dd, *J* = 2.4, 8.8 Hz, 1H), 3.86 (s, 3H), 1.16 (s, 21H); <sup>13</sup>C NMR (CDCl<sub>3</sub>, 75 MHz): δ 162.6, 133.7, 128.8, 128.7, 126.0, 119.9, 114.4, 105.0, 98.5, 55.7, 18.7, 11.4. HRMS for C<sub>19</sub>H<sub>28</sub>O<sub>3</sub>Si [M+H]<sup>+</sup> calcd. 333.1880, found 333.1872.

Preparation of **16p** :

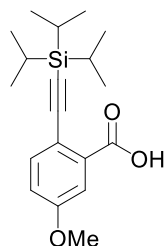

Compound **15p** (379 mg, 1.10 mmol) was dissolved in MeOH (6 ml) and THF (6 ml) at 0°C. KOH (614 mg, 10.95 mmol) dissolved in H<sub>2</sub>O (6 ml) was then added and the mixture was stirred for 1 hr at rt under N<sub>2</sub>. To workup, the mixture was acidified to pH~3 with 1M HCl solution, which allowed the product to be extracted with EtOAc. The organic layer was washed with H<sub>2</sub>O, brine, dried over sodium sulfate, and evaporated under vacuum. Flash column chromatography using a gradient of 0-50% EtOAc in Hex was used to purify the desired compound. Yield: 361 mg, quan. *R*<sub>f</sub>=0.09 (EtOAc/Hex, 1:4). <sup>1</sup>H NMR (CDCl<sub>3</sub>, 300 MHz) δ 7.58-7.54 (m, 2H), 7.04 (dd, *J* = 2.8, 8.6 Hz, 1H), 3.87 (s, 3H), 1.15 (s, 21H); <sup>13</sup>C NMR (CDCl<sub>3</sub>, 75 MHz): δ 170.4, 159.5, 136.5, 132.9, 119.1, 116.2, 115.6, 104.8, 96.8, 55.7, 18.7, 11.4. HRMS for C<sub>19</sub>H<sub>28</sub>O<sub>3</sub>Si [M+Na]<sup>+</sup> calcd. 355.1700, found 355.1706.

Preparation of **17a** :

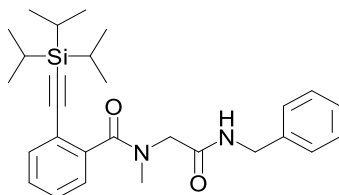

Compound **16a** (199 mg, 0.660 mmol), **2a** (118 mg, 0.660 mmol), EDC (204 mg, 1.32 mmol), HOBt (178 mg, 1.32 mmol) were dissolved in DMF (10 ml). NEt<sub>3</sub> (185 μl, 1.32 mmol) was then added and the mixture was stirred for 16 hr at room temperature under N<sub>2</sub>. To workup, the reaction was diluted with EtOAc and then the organic layer was washed with H<sub>2</sub>O, brine, dried over sodium sulfate, and evaporated under vacuum. Flash column chromatography using a gradient of 10-20% EtOAc in Hex was used to purify the desired compound. Yield: 236 mg, 77%. *R*<sub>f</sub>=0.46 (EtOAc/Hex, 1:1). <sup>1</sup>H NMR (CDCl<sub>3</sub>, 300 MHz, mixture of rotamers) δ 7.55-7.48 (m, 1H), 7.38-7.28 (m, 6H), 7.23-7.14 (m, 2H), 6.98 (br s, 1H), 4.48 (d, *J* = 5.9, 2H), 3.98 (s, 2H), 3.02 (s, 3H), 1.10 (s, 21H); <sup>13</sup>C NMR (CDCl<sub>3</sub>, 75 MHz): δ 171.0, 168.5, 138.0, 132.8, 129.0, 128.7, 128.5, 127.5, 127.3, 127.2, 126.6, 120.0, 103.3, 94.7, 54.3, 52.0, 43.0, 37.5, 34.0, 18.2, 10.8. HRMS for C<sub>28</sub>H<sub>38</sub>N<sub>2</sub>O<sub>2</sub>Si [M+H]<sup>+</sup> calcd. 463.2775, found 463.2770.

Preparation of **17b** :

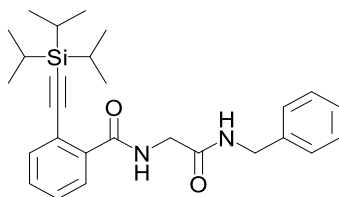

Compound **16a** (100 mg, 0.330 mmol), **2b** (54 mg, 0.330 mmol), EDC (102 mg, 0.660 mmol), HOBt (89 mg, 0.660 mmol) were dissolved in DMF (10 ml). NEt<sub>3</sub> (93 μl, 0.660 mmol) was then added and the mixture was stirred for 16 hr at room temperature under N<sub>2</sub>. To workup, the reaction was diluted with EtOAc and then the organic layer was washed with H<sub>2</sub>O, brine, dried over sodium sulfate, and evaporated under vacuum. Flash column chromatography using a gradient of 10-25% EtOAc in Hex was used to purify the desired compound. Yield: 134 mg, 91%. *R*<sub>f</sub>=0.37 (EtOAc/Hex, 1:1). <sup>1</sup>H NMR (CDCl<sub>3</sub>, 300 MHz) δ 8.36 (br s, 1H), 8.07-8.04 (m, 1H), 7.59-7.56 (m, 1H), 7.45-7.42 (m, 2H), 7.33-7.23 (m, 5H), 6.71 (br s, 1H), 4.46 (d, *J* = 5.9, 2H), 4.16 (d, *J* = 5.8, 2H), 1.13 (s, 21H); <sup>13</sup>C NMR (CDCl<sub>3</sub>, 75 MHz): δ 169.0, 167.2, 138.2, 134.8, 134.3, 131.3, 130.5, 129.3, 128.9, 127.8, 127.7, 120.2, 105.5, 99.8, 44.5, 43.5, 18.7, 11.2. HRMS for C<sub>27</sub>H<sub>36</sub>N<sub>2</sub>O<sub>2</sub>Si [M+H]<sup>+</sup> calcd. 449.2619, found 449.2627.

Preparation of **17c** :

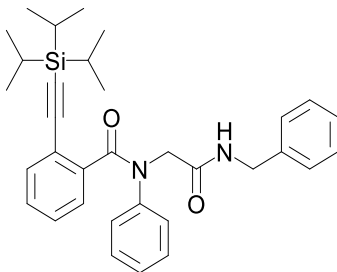

Compound **16a** (222 mg, 0.734 mmol), **2c** (177 mg, 0.735 mmol), EDC (228 mg, 1.47 mmol), HOBt (199 mg, 1.47 mmol) were dissolved in  $\text{CHCl}_3$  (10 ml).  $\text{NEt}_3$  (206  $\mu\text{l}$ , 1.47 mmol) was then added and the mixture was stirred for 16 hr at room temperature under  $\text{N}_2$ . To workup, the reaction was diluted with EtOAc and then the organic layer was washed with  $\text{H}_2\text{O}$ , brine, dried over sodium sulfate, and evaporated under vacuum. Flash column chromatography using a gradient of 10-20% EtOAc in Hex was used to purify the desired compound. Yield: 93 mg, 24%.  $R_f=0.63$  (EtOAc/Hex, 1:1).  $^1\text{H NMR}$  ( $\text{CDCl}_3$ , 300 MHz)  $\delta$  7.43-7.23 (m, 8H), 7.15-7.05 (m, 6H), 4.53-4.47 (m, 4H), 1.15 (s, 21H);  $^{13}\text{C NMR}$  ( $\text{CDCl}_3$ , 75 MHz):  $\delta$  170.9, 168.9, 142.6, 138.4, 133.1, 129.8, 129.2, 129.0(2), 128.8, 128.1, 128.0, 127.9, 127.7, 127.4, 127.3, 80.4, 80.1, 54.3, 43.7, 18.7, 11.4. **HRMS** for  $\text{C}_{33}\text{H}_{40}\text{N}_2\text{O}_2\text{Si}$   $[\text{M}+\text{H}]^+$  calcd. 525.2932, found 525.2928.

Preparation of **17d** :

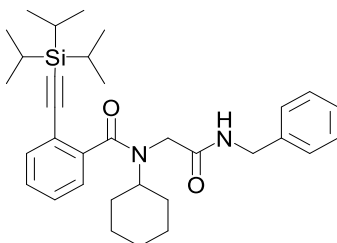

Compound **16a** (110 mg, 0.364 mmol), **2d** (90 mg, 0.364 mmol), HCTU (300 mg, 0.728 mmol), HOBt(6-Cl) (123 mg, 0.728 mmol) were dissolved in DMF (5 ml). DIPEA (247  $\mu\text{l}$ , 1.46 mmol) was then added and the mixture was stirred for 16 hr at room temperature under  $\text{N}_2$ . To workup, the reaction was diluted with EtOAc and then the organic layer was washed with  $\text{H}_2\text{O}$ , brine, dried over sodium sulfate, and evaporated under vacuum. Flash column chromatography using a gradient of 10-30% EtOAc in Hex was used to purify the desired compound. Yield: 181 mg, 93%.  $R_f=0.59$  (EtOAc/Hex, 1:1).  $^1\text{H NMR}$  ( $\text{CDCl}_3$ , 300 MHz)  $\delta$  7.54-7.50 (m, 1H), 7.43-7.27 (m, 8H), 7.02-6.96 (m, 1H), 4.67-4.49 (m, 2H), 4.39-4.24 (m, 1H), 3.74-3.61 (m, 1H), 3.29-3.19 (m, 1H), 2.00-1.85 (m, 1H), 1.73-1.65(m, 2H), 1.58-1.43 (m, 4H), 1.06 (s, 21H), 1.02-0.85 (m, 3H).  $^{13}\text{C NMR}$  ( $\text{CDCl}_3$ , 75 MHz):  $\delta$  171.7, 170.7, 139.2, 138.6, 133.7, 128.9 (2), 128.8, 127.7, 127.5, 125.7, 120.2, 104.0, 95.5, 59.9, 46.5, 43.5, 31.7, 31.0, 30.4, 25.6, 24.9, 18.6, 11.3. **HRMS** for  $\text{C}_{33}\text{H}_{46}\text{N}_2\text{O}_2\text{Si}$   $[\text{M}+\text{H}]^+$  calcd. 531.3401, found 531.3410.

Preparation of **17e** :

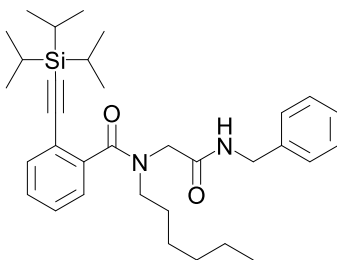

Compound **16a** (121 mg, 0.400 mmol), **2e** (99 mg, 0.400 mmol), HCTU (331 mg, 0.801 mmol), HOBt(6-Cl) (136 mg, 0.801 mmol) were dissolved in DMF (5 ml). DIPEA (272  $\mu\text{l}$ , 1.60 mmol) was then added and the mixture was stirred for 16 hr at room temperature under  $\text{N}_2$ . To workup, the reaction was diluted with EtOAc and then the organic layer was washed with  $\text{H}_2\text{O}$ , brine, dried over sodium sulfate, and evaporated under vacuum. Flash column chromatography using a gradient of 15-30% EtOAc in Hex was used to purify the desired compound. Yield: 210 mg, quan.  $R_f=0.64$  (EtOAc/Hex, 1:1).  $^1\text{H NMR}$  ( $\text{CDCl}_3$ , 300 MHz)  $\delta$  7.12-7.05 (m, 1H), 6.98-6.87 (m,



7H), 6.76-6.66 (m, 2H), 4.12-3.88 (m, 2H), 2.79 (s, 2H), 1.13-1.00 (m, 1H), 0.92-0.85 (m, 1H), 0.74-0.54 (m, 8H), 0.67 (s, 21H), 0.35 (t,  $J = 6.9$ , 3H).  $^{13}\text{C}$  NMR (CDCl<sub>3</sub>, 75 MHz):  $\delta$  171.6, 170.0, 168.4, 138.7, 138.5, 133.3, 129.1, 128.8(2), 127.9, 127.8, 127.6, 126.7, 120.5, 103.8, 95.4, 51.9, 51.8, 43.4, 31.0, 28.4, 26.1, 22.4, 18.7, 13.9, 11.3. HRMS for C<sub>33</sub>H<sub>48</sub>N<sub>2</sub>O<sub>2</sub>Si [M+Na]<sup>+</sup> calcd. 555.3377, found 555.3387.

Preparation of **17f** :

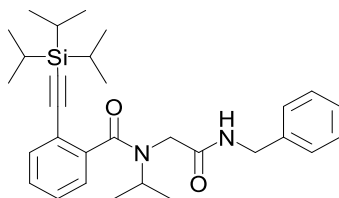

Compound **16a** (130 mg, 0.430 mmol), **2f** (89 mg, 0.430 mmol), EDC (133 mg, 0.860 mmol), HOBt (116 mg, 0.860 mmol) were dissolved in DMF (5 ml). NEt<sub>3</sub> (240  $\mu$ l, 1.72 mmol) was then added and the mixture was stirred for 16 hr at room temperature under N<sub>2</sub>. To workup, the reaction was diluted with EtOAc and then the organic layer was washed with H<sub>2</sub>O, brine, dried over sodium sulfate, and evaporated under vacuum. Flash column chromatography using a gradient of 15-30% EtOAc in Hex was used to purify the desired compound. Yield: 210 mg, quan.  $R_f=0.54$  (EtOAc/Hex, 1:1).  $^1\text{H}$  NMR (CDCl<sub>3</sub>, 300 MHz)  $\delta$  7.53-7.56 (m, 1H), 7.28-7.45 (m, 7H), 7.01-7.04 (m, 1H), 4.72-4.52 (m, 2H), 4.41-4.24 (m, 2H), 3.76 (quin,  $J = 6.7$  Hz, 1H), 1.23 (m, 6H), 1.09 (m, 21H);  $^{13}\text{C}$  NMR (CDCl<sub>3</sub>, 75 MHz):  $\delta$  171.5, 170.6, 139.2, 138.7, 133.8, 128.9(2), 128.8, 127.7, 127.5, 125.6, 120.3, 103.9, 95.6, 51.4, 45.5, 43.5, 18.7(2), 11.3. HRMS for C<sub>30</sub>H<sub>42</sub>N<sub>2</sub>O<sub>2</sub>Si [M+H]<sup>+</sup> calcd. 491.3088, found 491.3092.

Preparation of **17g** :

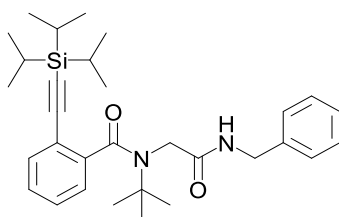

Compound **16a** (140 mg, 0.463 mmol), **2g** (102 mg, 0.463 mmol), HCTU (383 mg, 0.926 mmol), HOBT(6-Cl) (157 mg, 0.926 mmol) were dissolved in DMF (5 ml). DIPEA (260  $\mu$ l, 1.85 mmol) was then added and the mixture was stirred for 16 hr at room temperature under N<sub>2</sub>. To workup, the reaction was diluted with EtOAc and then the organic layer was washed with H<sub>2</sub>O, brine, dried over sodium sulfate, and evaporated under vacuum. Flash column chromatography using a gradient of 10-25% EtOAc in Hex was used to purify the desired compound. Yield: 26 mg, 11%.  $R_f=0.14$  (EtOAc/Hex, 1:4).  $^1\text{H}$  NMR (CDCl<sub>3</sub>, 300 MHz)  $\delta$  7.46 (d,  $J = 8.7$ , 1H), 7.36-7.16 (m, 7H), 7.10 (d,  $J = 7.1$ , 1H), 4.40 (d,  $J = 5.9$ , 2H), 4.00 (s, 2H), 1.54 (s, 9H), 1.10 (s, 21H);  $^{13}\text{C}$  NMR (CDCl<sub>3</sub>, 75 MHz):  $\delta$  164.8, 162.6, 137.9, 134.0, 131.8, 129.0, 128.9, 128.6, 128.0, 127.9, 127.5, 126.2, 95.6, 92.5, 58.5, 50.9, 43.6, 28.7, 18.7, 11.3. HRMS for C<sub>31</sub>H<sub>44</sub>N<sub>2</sub>O<sub>2</sub>Si [M+H]<sup>+</sup> calcd. 505.3245, found 505.3247.

Preparation of **17h** :

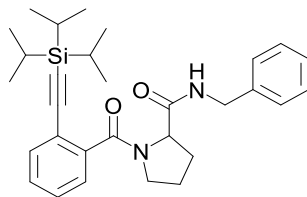

Compound **16a** (132 mg, 0.437 mmol), **2h** (89 mg, 0.437 mmol), HCTU (361 mg, 0.873 mmol), HOBT(6-Cl) (148 mg, 0.873 mmol) were dissolved in DMF (5 ml). DIPEA (296  $\mu$ l, 1.75 mmol) was then added and the mixture was stirred for 16 hr at room temperature under N<sub>2</sub>. To workup, the reaction was diluted with EtOAc and then the organic layer was washed with H<sub>2</sub>O, brine, dried over sodium sulfate, and evaporated under vacuum. Flash column chromatography using a gradient of 25-50% EtOAc in Hex was used to purify the desired compound. Yield: 213 mg, quan.  $R_f=0.42$  (EtOAc/Hex,1:1).  $^1\text{H}$  NMR (CDCl<sub>3</sub>, 300 MHz)  $\delta$  7.92-7.82 (m, 2H), 7.71 (d,  $J =$

1.7, 1H), 7.51-7.02 (m, 6H), 4.63-4.38 (m, 1H), 4.26-4.03 (m, 1H), 3.84-3.63 (m, 1H), 3.49-3.25 (m, 2H), 2.32-2.17 (m, 1H), 2.10-1.82 (m, 3H), 1.10 (s, 21H); <sup>13</sup>C NMR (CDCl<sub>3</sub>, 75 MHz): δ 174.3, 171.4, 134.9, 134.0, 130.5, 130.4, 130.1, 129.6, 128.9, 128.4, 128.2, 127.5, 121.2, 110.5, 63.0, 61.5, 44.0, 33.2, 31.3, 25.7, 23.8, 19.1, 12.4. HRMS for C<sub>30</sub>H<sub>40</sub>N<sub>2</sub>O<sub>2</sub>Si [M+H]<sup>+</sup> calcd. 489.2932, found 489.2942.

Preparation of **17i** :

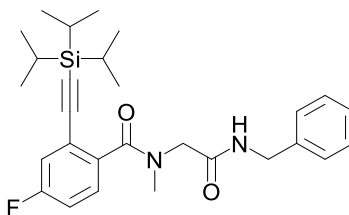

Compound **16i** (132 mg, 0.413 mmol), **2a** (88 mg, 0.495 mmol), EDC (128 mg, 0.825 mmol), HOBt (111 mg, 0.825 mmol) were dissolved in DMF (8 ml). NEt<sub>3</sub> (230 μl, 1.65 mmol) was then added and the mixture was stirred for 16 hr at room temperature under N<sub>2</sub>. To workup, the reaction was diluted with EtOAc and then the organic layer was washed with H<sub>2</sub>O, brine, dried over sodium sulfate, and evaporated under vacuum. Flash column chromatography using a gradient of 30-50% EtOAc in Hex was used to purify the desired compound. Yield: 167 mg, 84%. R<sub>f</sub>=0.43 (EtOAc/Hex, 1:1). <sup>1</sup>H NMR (CDCl<sub>3</sub>, 300 MHz, mixture of rotamers) δ 7.37-7.28 (m, 4H), 7.22-7.16 (m, 3H), 7.10-7.03 (m, 1H), 4.48 (d, J= 5.8, 2H), 4.07 (s, 2H), 3.02 (s, 3H), 1.10 (s, 21H); <sup>13</sup>C NMR (CDCl<sub>3</sub>, 75 MHz): δ 170.7, 168.8, 163.5, 129.3, 129.0(2), 128.0, 127.8, 120.0, 116.8, 116.5, 115.8, 102.6, 94.9, 55.8, 52.5, 43.5, 38.0, 25.8, 18.7, 11.2. HRMS for C<sub>28</sub>H<sub>37</sub>FN<sub>2</sub>O<sub>2</sub>Si [M+H]<sup>+</sup> calcd. 481.2681, found 481.2685.

Preparation of **17j** :

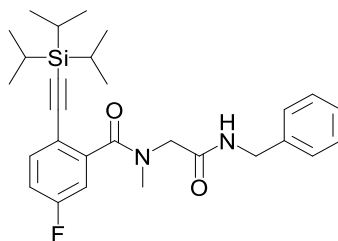

Compound **16j** (132 mg, 0.413 mmol), **2a** (88 mg, 0.495 mmol), EDC (128 mg, 0.825 mmol), HOBt (111 mg, 0.825 mmol) were dissolved in DMF (8 ml). NEt<sub>3</sub> (230 μl, 1.65 mmol) was then added and the mixture was stirred for 16 hr at room temperature under N<sub>2</sub>. To workup, the reaction was diluted with EtOAc and then the organic layer was washed with H<sub>2</sub>O, brine, dried over sodium sulfate, and evaporated under vacuum. Flash column chromatography using a gradient of 15-30% EtOAc in Hex was used to purify the desired compound. Yield: 198 mg, quan. R<sub>f</sub>=0.59 (EtOAc/Hex, 1:1). <sup>1</sup>H NMR (CDCl<sub>3</sub>, 300 MHz, mixture of rotamers) δ 7.52-7.45 (m, 1H), 7.38-7.28 (m, 3H), 7.15-6.88 (m, 4H), 4.46 (d, J= 5.9, 2H), 3.97 (s, 2H), 3.02 (s, 3H), 1.09 (s, 21H); <sup>13</sup>C NMR (CDCl<sub>3</sub>, 75 MHz): δ 169.9, 168.5, 167.7, 140.5, 138.3, 135.3, 129.0, 127.7, 116.9, 116.6, 114.6, 114.3, 102.6, 94.9, 54.5, 52.2, 43.5, 37.8, 34.4, 18.6, 11.2. HRMS for C<sub>28</sub>H<sub>37</sub>FN<sub>2</sub>O<sub>2</sub>Si [M+H]<sup>+</sup> calcd. 481.2681, found 481.2691.

Preparation of **17k** :

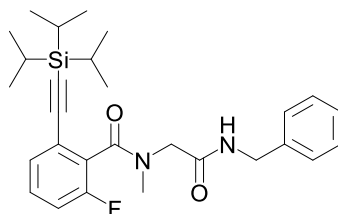

Compound **16k** (143 mg, 0.447 mmol), **2a** (95 mg, 0.536 mmol), HCTU (369 mg, 0.894 mmol), HOBt(6-Cl) (152 mg, 0.894 mmol) were dissolved in DMF (10 ml). DIPEA (303 μl, 1.79 mmol) was then added and the mixture was stirred for 16 hr at room temperature under N<sub>2</sub>. To workup, the reaction was diluted with EtOAc and then the organic layer was washed with H<sub>2</sub>O, brine, dried over sodium sulfate, and evaporated under vacuum. Flash column chromatography using a gradient of 15-30% EtOAc in Hex was used to purify the desired compound.

Yield: 181 mg, 84%.  $R_f=0.50$  (EtOAc/Hex, 1:1).  $^1\text{H NMR}$  ( $\text{CDCl}_3$ , 300 MHz, mixture of rotamers)  $\delta$  7.36-7.28 (m, 8H), 7.12-6.97 (m, 1H), 6.77 (br s, 1H), 4.65-4.37 (m, 3H), 3.47-3.37 (m, 1H), 2.99 (s, 3H), 1.10 (s, 21H);  $^{13}\text{C NMR}$  ( $\text{CDCl}_3$ , 75 MHz):  $\delta$  168.4, 167.8, 166.4, 138.0, 137.6, 130.8, 130.7, 129.0, 128.9, 127.9, 127.7, 122.6, 116.5, 116.2, 102.2, 96.7, 54.8, 52.1, 43.6, 37.3, 34.1, 18.6, 11.2. **HRMS** for  $\text{C}_{28}\text{H}_{37}\text{FN}_2\text{O}_2\text{Si}$   $[\text{M}+\text{H}]^+$  calcd. 481.2681, found 481.2685.

Preparation of **17l** :

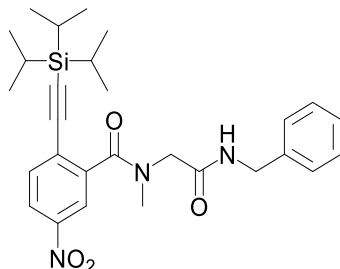

Compound **16l** (207 mg, 0.561 mmol), **2a** (120 mg, 0.674 mmol), EDC (174 mg, 1.12 mmol), HOBt (152 mg, 1.12 mmol) were dissolved in DMF (5 ml).  $\text{NEt}_3$  (314  $\mu\text{l}$ , 2.25 mmol) was then added and the mixture was stirred for 16 hr at room temperature under  $\text{N}_2$ . To workup, the reaction was diluted with EtOAc and then the organic layer was washed with  $\text{H}_2\text{O}$ , brine, dried over sodium sulfate, and evaporated under vacuum. Flash column chromatography using a gradient of 15-30% EtOAc in Hex was used to purify the desired compound. Yield: 207 mg, 73%.  $R_f=0.61$  (EtOAc/Hex, 1:1).  $^1\text{H NMR}$  ( $\text{CDCl}_3$ , 300 MHz, mixture of rotamers)  $\delta$  8.26-8.13 (m, 2H), 7.71-7.61 (m, 1H), 7.43-7.29 (m, 5H), 6.87 (br s, 1H), 4.48 (d,  $J=5.9$ , 2H), 3.97 (s, 2H), 3.03 (s, 3H), 1.11 (s, 21H);  $^{13}\text{C NMR}$  ( $\text{CDCl}_3$ , 75 MHz):  $\delta$  168.9, 168.1, 167.2, 147.3, 139.8, 138.2, 134.2, 129.0, 127.8, 127.7, 126.7, 124.1, 122.6, 101.8, 54.4, 52.1, 43.5, 37.9, 34.5, 18.6, 11.1. **HRMS** for  $\text{C}_{28}\text{H}_{37}\text{N}_3\text{O}_4\text{Si}$   $[\text{M}+\text{H}]^+$  calcd. 508.2626, found 508.2622.

Preparation of **17m** :

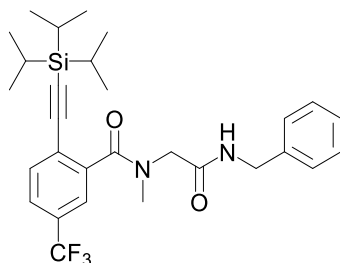

Compound **16m** (85 mg, 0.229 mmol), **2a** (41 mg, 0.229 mmol), EDC (72 mg, 0.459 mmol), HOBt (62 mg, 0.459 mmol) were dissolved in DMF (8 ml).  $\text{NEt}_3$  (128  $\mu\text{l}$ , 0.918 mmol) was then added and the mixture was stirred for 16 hr at room temperature under  $\text{N}_2$ . To workup, the reaction was diluted with EtOAc and then the organic layer was washed with  $\text{H}_2\text{O}$ , brine, dried over sodium sulfate, and evaporated under vacuum. Flash column chromatography using a gradient of 25-50% EtOAc in Hex was used to purify the desired compound. Yield: 120 mg, quan.  $R_f=0.16$  (EtOAc/Hex, 1:4).  $^1\text{H NMR}$  ( $\text{CDCl}_3$ , 300 MHz, mixture of rotamers)  $\delta$  7.66-7.45 (m, 4H), 7.37-7.25 (m, 4H), 6.94 (br s, 1H), 4.48 (d,  $J=5.8$ , 2H), 3.99 (s, 2H), 3.02 (s, 3H), 1.11 (s, 21H);  $^{13}\text{C NMR}$  ( $\text{CDCl}_3$ , 75 MHz):  $\delta$  169.9, 168.4, 167.5, 139.1, 138.3, 133.6, 128.9, 127.8, 127.7, 126.1, 124.0, 121.7, 102.3, 98.6, 54.5, 52.2, 43.5, 37.9, 34.4, 18.6, 11.2. **HRMS** for  $\text{C}_{29}\text{H}_{37}\text{F}_3\text{N}_2\text{O}_2\text{Si}$   $[\text{M}+\text{H}]^+$  calcd. 531.2649, found 531.2653.

Preparation of **17n** :

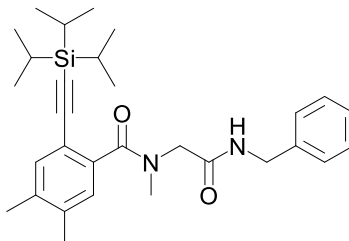

Compound **16n** (168 mg, 0.509 mmol), **2a** (109 mg, 0.610 mmol), EDC (158 mg, 1.02 mmol), HOBt (137 mg, 1.02 mmol) were dissolved in DMF (10 ml).  $\text{NEt}_3$  (345  $\mu\text{l}$ , 2.03 mmol) was then added and the mixture was stirred for 16 hr at room temperature under  $\text{N}_2$ . To workup, the reaction was diluted with EtOAc and then the organic layer was washed with  $\text{H}_2\text{O}$ , brine, dried over sodium sulfate, and evaporated under vacuum. Flash column chromatography using a gradient of 25-50% EtOAc in Hex was used to purify the desired compound. Yield: 243 mg, 97%.  $R_f=0.53$  (EtOAc/Hex, 1:1).  $^1\text{H NMR}$  ( $\text{CDCl}_3$ , 300 MHz, mixture of rotamers)  $\delta$  7.37-7.27 (m, 6H), 7.07-6.99 (m, 1H), 6.95 (br s, 1H), 4.48 (d,  $J=5.8$ , 2H), 4.01 (s, 2H), 3.02 (s, 3H), 2.24 (s, 6H), 1.09 (s, 21H);  $^{13}\text{C NMR}$  ( $\text{CDCl}_3$ , 75 MHz):  $\delta$  171.8, 169.2, 168.2, 138.5, 138.3, 135.9, 134.0, 128.9, 128.3, 127.7, 127.6, 117.7, 104.2, 93.7, 54.9, 52.7, 43.4, 37.9, 34.3, 19.7, 19.4, 18.7, 11.3. HRMS for  $\text{C}_{30}\text{H}_{42}\text{N}_2\text{O}_2\text{Si}$   $[\text{M}+\text{H}]^+$  calcd. 491.3088, found 491.3097.

Preparation of **17o** :

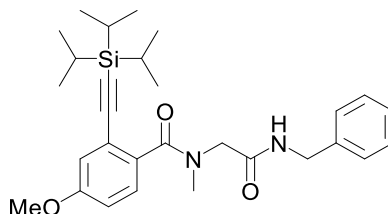

Compound **16o** (126 mg, 0.379 mmol), **2a** (88 mg, 0.493 mmol), EDC (117 mg, 0.758 mmol), HOBt (102 mg, 0.758 mmol) were dissolved in DMF (10 ml).  $\text{NEt}_3$  (212  $\mu\text{l}$ , 1.52 mmol) was then added and the mixture was stirred for 16 hr at room temperature under  $\text{N}_2$ . To workup, the reaction was diluted with EtOAc and then the organic layer was washed with  $\text{H}_2\text{O}$ , brine, dried over sodium sulfate, and evaporated under vacuum. Flash column chromatography using a gradient of 0-50% EtOAc in Hex was used to purify the desired compound. Yield: 186 mg, quan.  $R_f=0.36$  (EtOAc/Hex, 1:1).  $^1\text{H NMR}$  ( $\text{CDCl}_3$ , 300 MHz, mixture of rotamers)  $\delta$  7.36-7.28 (m, 4H), 7.17-7.08 (m, 3H), 6.99-6.87 (m, 2H), 4.47 (d,  $J=5.9$ , 2H), 4.13 (s, 2H), 3.82 (s, 3H), 3.03 (s, 3H), 1.10 (s, 21H);  $^{13}\text{C NMR}$  ( $\text{CDCl}_3$ , 75 MHz):  $\delta$  171.5, 169.1, 160.2, 138.5, 130.9, 128.9, 127.9, 127.7, 127.6, 121.8, 117.8, 115.5, 103.8, 95.0, 55.6, 54.9, 52.6, 43.4, 38.0, 34.5, 18.7, 11.3. HRMS for  $\text{C}_{29}\text{H}_{40}\text{N}_2\text{O}_3\text{Si}$   $[\text{M}+\text{H}]^+$  calcd. 493.2881, found 493.2887.

Preparation of **17p** :

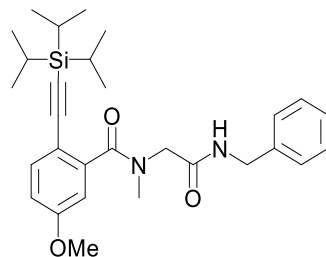

Compound **16p** (176 mg, 0.530 mmol), **2a** (142 mg, 0.795 mmol), EDC (164 mg, 1.06 mmol), HOBt (143 mg, 1.06 mmol) were dissolved in DMF (10 ml).  $\text{NEt}_3$  (289  $\mu\text{l}$ , 2.12 mmol) was then added and the mixture was stirred for 16 hr at room temperature under  $\text{N}_2$ . To workup, the reaction was diluted with EtOAc and then the organic layer was washed with  $\text{H}_2\text{O}$ , brine, dried over sodium sulfate, and evaporated under vacuum. Flash column chromatography using a gradient of 20-50% EtOAc in Hex was used to purify the desired compound. Yield: 178 mg, 68%.  $R_f=0.36$  (EtOAc/Hex, 1:1).  $^1\text{H NMR}$  ( $\text{CDCl}_3$ , 300 MHz, mixture of rotamers)  $\delta$  7.45-7.28 (m, 5H), 6.94-6.70 (m, 4H), 4.48 (d,  $J=5.9$ , 2H), 4.13 (s, 2H), 3.78 (s, 3H), 3.04 (s, 3H), 1.09 (s, 21H);  $^{13}\text{C NMR}$

(CDCl<sub>3</sub>, 75 MHz):  $\delta$  171.2, 168.9, 160.2, 140.0, 138.4, 134.8, 128.9, 127.7, 115.9, 112.6, 111.9, 111.7, 103.8, 93.1, 55.6, 55.5, 52.5, 43.4, 37.9, 34.3, 18.7, 11.3. **HRMS** for C<sub>29</sub>H<sub>40</sub>N<sub>2</sub>O<sub>3</sub>Si [M+H]<sup>+</sup> calcd. 493.2881, found 493.2890.

Preparation of **1a** :

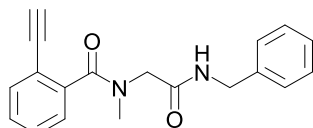

Compound **17a** (236 mg, 0.510 mmol) was dissolved in DCM (2 ml). TBAF (764  $\mu$ l of 1.0M solution, 0.764 mmol) was then added and the mixture was stirred for 1 hr at room temperature under N<sub>2</sub>. To workup, the reaction was diluted with EtOAc and then the organic layer was washed with H<sub>2</sub>O, brine, dried over sodium sulfate, and evaporated under vacuum. Flash column chromatography using a gradient of 50-100% EtOAc in Hex was used to purify the desired compound. Yield: 155 mg, quan. *R*<sub>f</sub>=0.13 (EtOAc/Hex, 1:1). **<sup>1</sup>H NMR** (CDCl<sub>3</sub>, 300 MHz, mixture of rotamers)  $\delta$  7.51-7.29 (m, 9H), 6.88 (br s, 1H), 4.49 (d, *J* = 5.6, 2H), 4.30 (s, 2H), 2.96 (s, 3H), 2.40 (s, 1H); **<sup>13</sup>C NMR** (CDCl<sub>3</sub>, 75 MHz):  $\delta$  170.9, 168.4, 138.7, 138.1, 133.2, 129.7, 129.5, 129.0, 128.3, 127.9, 126.6, 118.9, 81.2, 81.0, 55.0, 52.0, 43.7, 37.9, 34.0. **HRMS** for C<sub>19</sub>H<sub>18</sub>N<sub>2</sub>O<sub>2</sub> [M+Na]<sup>+</sup> calcd. 329.1260, found 329.1270.

Preparation of **1b** :

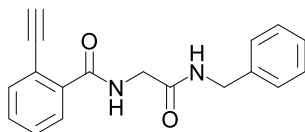

Compound **17b** (134 mg, 0.299 mmol) was dissolved in DCM (2 ml). TBAF (450  $\mu$ l of 1.0M solution, 0.448 mmol) was then added and the mixture was stirred for 1 hr at room temperature under N<sub>2</sub>. To workup, the reaction was diluted with EtOAc and then the organic layer was washed with H<sub>2</sub>O, brine, dried over sodium sulfate, and evaporated under vacuum to give a white precipitate, which was then washed with hexanes and filtered to give the desired compound. Yield: 42 mg, 48%. *R*<sub>f</sub>=0.29 (EtOAc/Hex, 1:1). **<sup>1</sup>H NMR** (CDCl<sub>3</sub>, 300 MHz)  $\delta$  8.13-8.05 (m, 1H), 7.76-7.69 (m, 1H), 7.56-7.49 (m, 1H), 7.42-7.19 (m, 6H), 4.44 (d, *J* = 5.7, 2H), 4.24 (d, *J* = 5.0, 2H), 3.36 (s, 1H); **<sup>13</sup>C NMR** (CDCl<sub>3</sub>, 75 MHz):  $\delta$  168.8, 166.8, 138.1, 135.8, 134.3, 130.9, 129.7, 129.4, 128.8, 128.0, 127.7, 119.1, 84.3, 81.9, 44.2, 43.6. **HRMS** for C<sub>18</sub>H<sub>16</sub>N<sub>2</sub>O<sub>2</sub> [M+Na]<sup>+</sup> calcd. 315.1104, found 315.1110.

Preparation of **1c** :

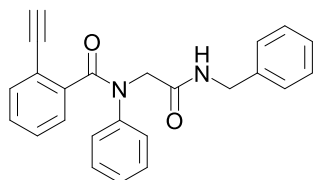

Compound **17c** (93 mg, 0.177 mmol) was dissolved in DCM (2 ml). TBAF (265  $\mu$ l of 1.0M solution, 0.265 mmol) was then added and the mixture was stirred for 1 hr at room temperature under N<sub>2</sub>. To workup, the reaction was diluted with EtOAc and then the organic layer was washed with H<sub>2</sub>O, brine, dried over sodium sulfate, and evaporated under vacuum. Flash column chromatography using a gradient of 20-50% EtOAc in Hex was used to purify the desired compound. Yield: 44 mg, 47%. *R*<sub>f</sub>=0.73 (EtOAc/Hex, 1:1). **<sup>1</sup>H NMR** (CDCl<sub>3</sub>, 300 MHz)  $\delta$  7.39-7.28 (m, 6H), 7.20-7.08 (m, 8H), 4.61 (s, 2H), 4.53 (d, *J* = 5.7 Hz, 2H), 2.62 (s, 1H); **<sup>13</sup>C NMR** (CDCl<sub>3</sub>, 75 MHz):  $\delta$  170.7, 168.6, 144.2, 143.7, 142.4, 139.3, 138.2, 133.1, 129.4, 129.1, 129.0, 128.7, 128.4, 127.9, 127.3(2), 81.7, 81.6, 54.6, 43.9. **HRMS** for C<sub>24</sub>H<sub>20</sub>N<sub>2</sub>O<sub>2</sub> [M+Na]<sup>+</sup> calcd. 391.1417, found 391.1421.

Preparation of **1d** :

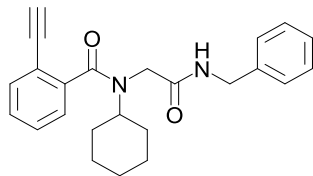

Compound **17d** (193 mg, 0.364 mmol) was dissolved in DCM (2 ml). TBAF (546  $\mu$ l of 1.0M solution, 0.546 mmol) was then added and the mixture was stirred for 1 hr at room temperature under  $N_2$ . To workup, the reaction was diluted with EtOAc and then the organic layer was washed with  $H_2O$ , brine, dried over sodium sulfate, and evaporated under vacuum. Flash column chromatography using a gradient of 20-50% EtOAc in Hex was used to purify the desired compound. Yield: 124 mg, 90%.  $R_f=0.31$  (EtOAc/Hex, 1:1).  $^1H$  NMR ( $CDCl_3$ , 300 MHz)  $\delta$  7.48-7.43 (m, 1H), 7.40-7.25 (m, 7H), 7.19-7.16 (m, 1H), 7.08 (br s, 1H), 4.70-4.50 (m, 2H), 4.40-4.24 (m, 1H), 3.88-3.72 (m, 1H), 3.27-3.17 (m, 1H), 2.18 (s, 1H), 1.93-1.80 (m, 1H), 1.77-1.60(m, 2H), 1.58-1.37 (m, 4H), 1.08-0.85 (m, 3H);  $^{13}C$  NMR ( $CDCl_3$ , 75 MHz):  $\delta$  171.3, 169.8, 139.5, 138.4, 133.2, 129.5, 129.1, 128.9, 128.4, 127.8, 125.6, 118.7, 81.2, 81.1, 59.4, 46.1, 43.7, 31.2, 30.8, 25.5, 25.4, 24.8. HRMS for  $C_{24}H_{26}N_2O_2$   $[M+H]^+$  calcd. 375.2067, found 375.2060.

Preparation of **1e** :

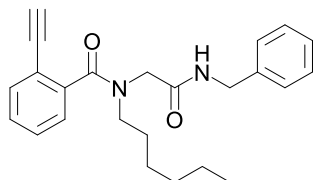

Compound **17e** (213 mg, 0.400 mmol) was dissolved in DCM (2 ml). TBAF (655  $\mu$ l of 1.0M solution, 0.655 mmol) was then added and the mixture was stirred for 1 hr at room temperature under  $N_2$ . To workup, the reaction was diluted with EtOAc and then the organic layer was washed with  $H_2O$ , brine, dried over sodium sulfate, and evaporated under vacuum. Flash column chromatography using a gradient of 25-50% EtOAc in Hex was used to purify the desired compound. Yield: 130 mg, 86%.  $R_f=0.35$  (EtOAc/Hex, X:X).  $^1H$  NMR ( $CDCl_3$ , 300 MHz)  $\delta$  7.51-7.44 (m, 1H), 7.41-7.27 (m, 7H), 7.09-7.00 (m, 1H), 4.48 (s, 2H), 3.17 (t,  $J=7.8$ , 2H), 2.35 (s, 1H), 1.81-1.72 (m, 1H), 1.54-1.40 (m, 2H), 1.32-1.00 (m, 7H), 0.80 (t,  $J=6.8$ , 3H);  $^{13}C$  NMR ( $CDCl_3$ , 75 MHz):  $\delta$  171.1, 169.0, 138.9, 138.2, 133.2, 129.5, 129.3, 129.0, 128.3, 127.8, 126.5, 118.9, 81.3, 81.2, 50.5, 49.9, 43.7, 31.1, 28.2, 26.0, 22.4, 13.9. HRMS for  $C_{24}H_{28}N_2O_2$   $[M+H]^+$  calcd. 377.2224, found 377.2230.

Preparation of **1f** :

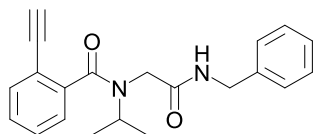

Compound **17f** (231 mg, 0.472 mmol) was dissolved in DCM (2 ml). TBAF (708  $\mu$ l of 1.0M solution, 0.708 mmol) was then added and the mixture was stirred for 1 hr at room temperature under  $N_2$ . To workup, the reaction was diluted with EtOAc and then the organic layer was washed with  $H_2O$ , brine, dried over sodium sulfate, and evaporated under vacuum. Flash column chromatography using a gradient of 50-75% EtOAc in Hex was used to purify the desired compound. Yield: 156 mg, 98%.  $R_f=0.57$  (EtOAc/Hex, 3:4).  $^1H$  NMR ( $CDCl_3$ , 300 MHz)  $\delta$  7.49-7.11 (m, 9H), 4.68-4.27 (m, 3H), 3.83-3.72 (m, 2H), 2.19 (s, 1H), 1.24 (s, 3H), 1.07 (s, 3H);  $^{13}C$  NMR ( $CDCl_3$ , 75 MHz):  $\delta$  171.1, 169.7, 139.4, 138.4, 133.3, 129.6, 129.2, 128.9, 128.5, 127.8, 125.7, 118.8, 81.2, 51.1, 45.0, 43.7, 20.7. HRMS for  $C_{21}H_{22}N_2O_2$   $[M+Na]^+$  calcd. 357.1573, found 357.1565.

Preparation of **1g** :

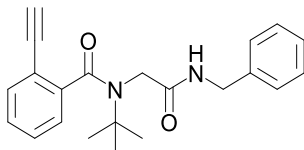

Compound **17g** (26 mg, 0.051 mmol) was dissolved in DCM (2 ml). TBAF (76  $\mu$ l of 1.0M solution, 0.076 mmol) was then added and the mixture was stirred for 1 hr at room temperature under  $N_2$ . To workup, the reaction was diluted with EtOAc and then the organic layer was washed with  $H_2O$ , brine, dried over sodium sulfate, and evaporated under vacuum. Flash column chromatography using a gradient of 30-50% EtOAc in Hex was used to purify the desired compound. Yield: 18 mg, 99%.  $R_f$ =0.41 (EtOAc/Hex, 1:1).  $^1H$  NMR ( $CDCl_3$ , 300 MHz)  $\delta$  7.48-7.43 (m, 1H), 7.37-7.19 (m, 7H), 7.16-7.13 (m, 1H), 4.40 (s, 2H), 3.95 (s, 2H), 2.92 (s, 1H), 1.50 (s, 9H);  $^{13}C$  NMR ( $CDCl_3$ , 75 MHz):  $\delta$  171.7, 169.8, 137.8, 133.4, 129.5, 129.0(2), 128.7, 128.3(2), 128.0, 125.6, 81.4, 58.8, 51.1, 50.1, 43.8, 28.5. HRMS for  $C_{22}H_{24}N_2O_2$   $[M+Na]^+$  calcd. 371.1730, found 371.1725.

Preparation of **1h** :

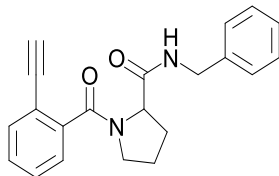

Compound **17h** (213 mg, 0.437 mmol) was dissolved in DCM (2 ml). TBAF (655  $\mu$ l of 1.0M solution, 0.655 mmol) was then added and the mixture was stirred for 1 hr at room temperature under  $N_2$ . To workup, the reaction was diluted with EtOAc and then the organic layer was washed with  $H_2O$ , brine, dried over sodium sulfate, and evaporated under vacuum. Flash column chromatography using a gradient of 50-75% EtOAc in Hex was used to purify the desired compound. Yield: 133 mg, 91%.  $R_f$ =0.39 (EtOAc/Hex, 3:4).  $^1H$  NMR ( $CDCl_3$ , 300 MHz)  $\delta$  7.50-7.22 (m, 9H), 4.93-4.82 (m, 1H), 4.62-4.33 (m, 2H), 3.52-3.42 (m, 1H), 3.27-3.13 (m, 1H), 2.61-2.44 (m, 2H), 2.16-1.81 (m, 4H);  $^{13}C$  NMR ( $CDCl_3$ , 75 MHz):  $\delta$  171.0, 170.0, 140.0, 138.4, 133.2, 129.6, 129.4, 128.9, 128.1, 127.6, 126.4, 118.8, 81.2, 80.8, 60.1, 49.0, 43.7, 28.2, 24.9. HRMS for  $C_{21}H_{20}N_2O_2$   $[M+H]^+$  calcd. 333.1598, found 333.1591.

Preparation of **1i** :

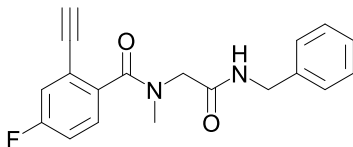

Compound **17i** (167 mg, 0.347 mmol) was dissolved in DCM (2 ml). TBAF (521  $\mu$ l of 1.0M solution, 0.521 mmol) was then added and the mixture was stirred for 1 hr at room temperature under  $N_2$ . To workup, the reaction was diluted with EtOAc and then the organic layer was washed with  $H_2O$ , brine, dried over sodium sulfate, and evaporated under vacuum. Flash column chromatography using a gradient of 50-75% EtOAc in Hex was used to purify the desired compound. Yield: 87 mg, 77%.  $R_f$ =0.14 (EtOAc/Hex, 1:1).  $^1H$  NMR ( $CDCl_3$ , 300 MHz, mixture of rotamers)  $\delta$  7.38-7.28 (m, 6H), 7.23-7.10 (m, 2H), 6.79 (br s, 1H), 4.49 (d,  $J$ = 5.6, 2H), 4.28 (s, 2H), 2.97 (s, 3H), 2.45 (s, 1H);  $^{13}C$  NMR ( $CDCl_3$ , 75 MHz):  $\delta$  170.2, 168.3, 161.0, 138.1, 129.1, 128.9, 128.8, 128.3, 128.0, 121.2, 120.2, 119.9, 117.5, 117.2, 82.1, 80.0, 52.2, 43.7, 38.0. HRMS for  $C_{19}H_{17}FN_2O_2$   $[M+Na]^+$  calcd. 347.1166, found 347.1176.

Preparation of **1j** :

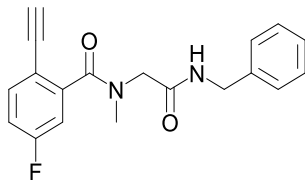

Compound **17j** (200 mg, 0.417 mmol) was dissolved in DCM (2 ml). TBAF (630  $\mu$ l of 1.0M solution, 0.626 mmol) was then added and the mixture was stirred for 1 hr at room temperature under  $N_2$ . To workup, the reaction was diluted with EtOAc and then the organic layer was washed with  $H_2O$ , brine, dried over sodium sulfate, and evaporated under vacuum. Flash column chromatography using a gradient of 50-75% EtOAc in Hex was used to purify the desired compound. Yield: 117 mg, 87%.  $R_f$  = 0.20 (EtOAc/Hex, 1:1).  $^1H$  NMR ( $CDCl_3$ , 300 MHz, mixture of rotamers)  $\delta$  7.51-7.46 (m, 1H), 7.38-7.29 (m, 6H), 7.11-6.99 (m, 2H), 4.49 (d,  $J$  = 5.6, 2H), 4.27 (s, 2H), 2.98 (s, 3H), 2.40 (s, 1H);  $^{13}C$  NMR ( $CDCl_3$ , 75 MHz):  $\delta$  169.5, 168.1, 164.6, 138.0, 135.5, 135.4, 129.1, 128.3, 128.1, 128.0, 117.1, 116.8, 114.4, 114.1, 80.8, 80.2, 52.1, 43.7, 37.8. HRMS for  $C_{19}H_{17}FN_2O_2$  [ $M+Na$ ] $^+$  calcd. 347.1166, found 347.1172.

Preparation of **1k** :

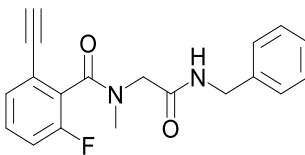

Compound **17k** (181 mg, 0.376 mmol) was dissolved in DCM (2 ml). TBAF (565  $\mu$ l of 1.0M solution, 0.565 mmol) was then added and the mixture was stirred for 1 hr at room temperature under  $N_2$ . To workup, the reaction was diluted with EtOAc and then the organic layer was washed with  $H_2O$ , brine, dried over sodium sulfate, and evaporated under vacuum. Flash column chromatography using a gradient of 50-75% EtOAc in Hex was used to purify the desired compound. Yield: 102 mg, 84%.  $R_f$  = 0.21 (EtOAc/Hex, 1:1).  $^1H$  NMR ( $CDCl_3$ , 300 MHz, mixture of rotamers)  $\delta$  7.39-7.29 (m, 8H), 7.19-7.09 (m, 1H), 4.69-4.63 (m, 1H), 4.52-4.48 (m, 2H), 4.00-3.95 (m, 1H), 2.98 (s, 3H), 2.51 (s, 1H);  $^{13}C$  NMR ( $CDCl_3$ , 75 MHz):  $\delta$  168.2, 159.8, 138.0, 131.1, 130.9, 129.2, 129.0, 128.2, 127.9, 117.2, 117.0, 82.0, 79.8, 52.0, 43.8, 37.3, 34.0. HRMS for  $C_{19}H_{17}FN_2O_2$  [ $M+Na$ ] $^+$  calcd. 347.1166, found 347.1169.

Preparation of **1l** :

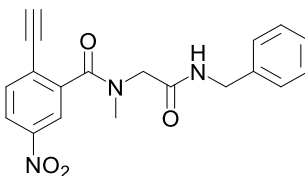

Compound **17l** (207 mg, 0.408 mmol) was dissolved in DCM (2 ml). TBAF (612  $\mu$ l of 1.0M solution, 0.612 mmol) was then added and the mixture was stirred for 1 hr at room temperature under  $N_2$ . To workup, the reaction was diluted with EtOAc and then the organic layer was washed with  $H_2O$ , brine, dried over sodium sulfate, and evaporated under vacuum. Flash column chromatography using a gradient of 50-75% EtOAc in Hex was used to purify the desired compound. Yield: 143 mg, quan.  $R_f$  = 0.44 (EtOAc/Hex, 3:4).  $^1H$  NMR ( $CDCl_3$ , 300 MHz, mixture of rotamers)  $\delta$  8.24-8.18 (m, 2H), 7.70-7.64 (m, 1H), 7.39-7.29 (m, 5H), 6.73 (br s, 1H), 4.49 (d,  $J$  = 5.6, 2H), 4.28 (s, 2H), 3.00 (s, 3H), 2.75 (s, 1H);  $^{13}C$  NMR ( $CDCl_3$ , 75 MHz):  $\delta$  168.5, 167.8, 147.8, 140.1, 138.0, 134.3, 129.1, 128.3, 128.0, 125.5, 124.2, 122.2, 86.1, 79.3, 54.6, 52.1, 43.8, 37.9, 34.4. HRMS for  $C_{19}H_{17}N_3O_4$  [ $M+Na$ ] $^+$  calcd. 374.1111, found 374.1104.



Preparation of **1m** :

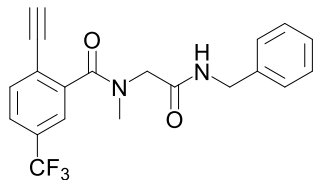

Compound **17m** (84 mg, 0.158 mmol) was dissolved in DCM (2 ml). TBAF (236  $\mu$ l of 1.0M solution, 0.236 mmol) was then added and the mixture was stirred for 1 hr at room temperature under  $N_2$ . To workup, the reaction was diluted with EtOAc and then the organic layer was washed with  $H_2O$ , brine, dried over sodium sulfate, and evaporated under vacuum. Flash column chromatography using a gradient of 25-50% EtOAc in Hex was used to purify the desired compound. Yield: 58 mg, quan.  $R_f$ =0.19 (EtOAc/Hex, 1:1).  $^1H$  NMR ( $CDCl_3$ , 300 MHz, mixture of rotamers)  $\delta$  7.62-7.57 (m, 3H), 7.38-7.29 (m, 5H), 6.81 (br s, 1H), 4.49 (d,  $J$ = 5.6, 2H), 4.27 (s, 2H), 2.98 (s, 3H), 2.61 (s, 1H);  $^{13}C$  NMR ( $CDCl_3$ , 75 MHz):  $\delta$  169.4, 168.0, 167.3, 139.4, 138.0, 133.7, 129.0, 128.2, 127.9, 125.2, 122.7, 83.6, 79.8, 54.6, 52.0, 43.7, 37.9, 34.2. HRMS for  $C_{20}H_{17}F_3N_2O_2$   $[M+Na]^+$  calcd. 397.1134, found 397.1140.

Preparation of **1n** :

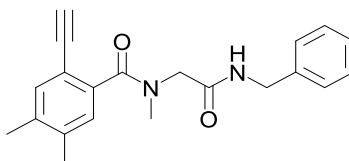

Compound **17n** (243 mg, 0.510 mmol) was dissolved in DCM (2 ml). TBAF (765  $\mu$ l of 1.0M solution, 0.765 mmol) was then added and the mixture was stirred for 1 hr at room temperature under  $N_2$ . To workup, the reaction was diluted with EtOAc and then the organic layer was washed with  $H_2O$ , brine, dried over sodium sulfate, and evaporated under vacuum. Flash column chromatography using a gradient of 50-75% EtOAc in Hex was used to purify the desired compound. Yield: 159 mg, 93%.  $R_f$ =0.20 (EtOAc/Hex, 1:1).  $^1H$  NMR ( $CDCl_3$ , 300 MHz, mixture of rotamers)  $\delta$  7.37-7.21 (m, 7H), 6.92 (br s, 1H), 4.49 (d,  $J$ = 5.6, 2H), 4.29 (s, 2H), 2.97 (s, 3H), 2.36 (s, 1H), 2.26 (s, 3H), 2.24 (s, 3H);  $^{13}C$  NMR ( $CDCl_3$ , 75 MHz):  $\delta$  171.3, 168.6, 168.0, 139.1, 138.4, 138.1, 136.2, 134.0, 129.0, 128.2, 127.8(2), 116.1, 81.6, 79.9, 52.0, 43.6, 37.9, 19.7. HRMS for  $C_{21}H_{22}N_2O_2$   $[M+Na]^+$  calcd. 357.1573, found 357.1574.

Preparation of **1o** :

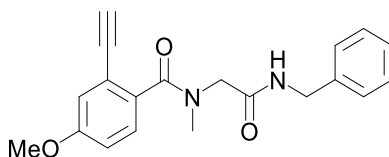

Compound **17o** (208 mg, 0.423 mmol) was dissolved in DCM (2 ml). TBAF (635  $\mu$ l of 1.0M solution, 0.635 mmol) was then added and the mixture was stirred for 1 hr at room temperature under  $N_2$ . To workup, the reaction was diluted with EtOAc and then the organic layer was washed with  $H_2O$ , brine, dried over sodium sulfate, and evaporated under vacuum. Flash column chromatography using a gradient of 75-100% EtOAc in Hex was used to purify the desired compound. Yield: 103 mg, 72%.  $R_f$ =0.09 (EtOAc/Hex, 1:1).  $^1H$  NMR ( $CDCl_3$ , 300 MHz, mixture of rotamers)  $\delta$  7.37-7.20 (m, 6H), 6.98-6.91 (m, 3H), 4.49 (d,  $J$ = 5.6, 2H), 4.28 (s, 2H), 3.81 (s, 3H), 2.98 (s, 3H), 2.40 (s, 1H);  $^{13}C$  NMR ( $CDCl_3$ , 75 MHz):  $\delta$  171.0, 168.6, 160.1, 138.1, 131.1, 129.0, 128.4, 128.3, 127.9, 120.3, 117.8, 116.1, 81.3, 80.8, 55.6, 52.2, 43.6, 38.1. HRMS for  $C_{20}H_{20}N_2O_3$   $[M+Na]^+$  calcd. 359.1366, found 359.1370.

Preparation of **1p** :

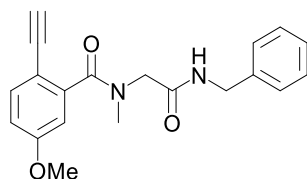

Compound **17p** (178mg, 0.362 mmol) was dissolved in DCM (2 ml). TBAF (550  $\mu$ l of 1.0M solution, 0.544 mmol) was then added and the mixture was stirred for 1 hr at room temperature under  $N_2$ . To workup, the reaction was diluted with EtOAc and then the organic layer was washed with  $H_2O$ , brine, dried over sodium sulfate, and evaporated under vacuum. Flash column chromatography using a gradient of 50-75% EtOAc in Hex was used to purify the desired compound. Yield: 121 mg, 99%.  $R_f$ =0.10 (EtOAc/Hex, 1:1).  $^1H$  NMR ( $CDCl_3$ , 300 MHz, mixture of rotamers)  $\delta$  7.42-7.28 (m, 6H), 6.92-6.78 (m, 3H), 4.49 (d,  $J$ = 5.6, 2H), 4.29 (s, 2H), 3.82 (s, 3H), 2.98 (s, 3H), 2.32 (s, 1H);  $^{13}C$  NMR ( $CDCl_3$ , 75 MHz):  $\delta$  170.7, 168.4, 160.6, 140.2, 138.0, 134.8, 129.0, 128.3, 128.1, 127.9, 115.8, 111.7, 110.8, 81.4, 79.5, 55.7, 52.0, 43.6, 37.8, 33.9. HRMS for  $C_{20}H_{20}N_2O_3$   $[M+Na]^+$  calcd. 359.1366, found 359.1376.

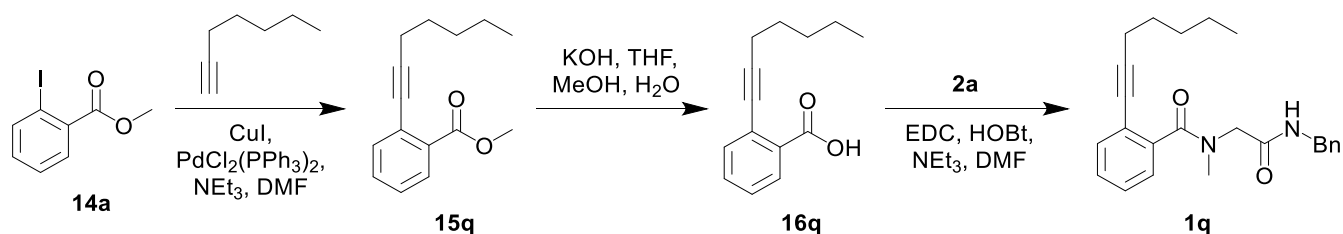

**Scheme S6.** Synthesis of **1q**

Preparation of **15q** :

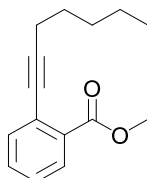

Compound **14a** (520 mg, 1.99 mmol), CuI (76 mg, 0.397 mmol), and  $PdCl_2(PPh_3)_2$  (140 mg, 0.199 mmol) were dissolved in DMF (2 ml) and  $NEt_3$  (2 ml). The mixture was degassed with  $N_2$  for 5 min. 1-Heptyne (521  $\mu$ l, 3.97 mmol) was then added and the mixture was stirred for 16 hr at  $30^\circ C$  under  $N_2$ . To workup, the reaction was diluted with EtOAc and then the organic layer was washed with  $H_2O$ , brine, dried over sodium sulfate, and evaporated under vacuum. Flash column chromatography using a gradient of 10-20% EtOAc in Hex was used to purify the desired compound. Yield: 413 mg, 90%.  $R_f$ =0.63 (EtOAc/Hex, 1:4).  $^1H$  NMR ( $CDCl_3$ , 300 MHz)  $\delta$  7.88 (d,  $J$ = 7.9, 1H), 7.52-7.28 (m, 3H), 3.92 (s, 3H), 2.47 (t,  $J$ = 7.0, 2H), 1.69-1.60 (m, 2H), 1.51-1.31 (m, 4H), 0.93 (t,  $J$ = 7.2, 3H);  $^{13}C$  NMR ( $CDCl_3$ , 75 MHz):  $\delta$  167.3, 134.4, 132.2, 131.7, 130.3, 127.3, 124.7, 96.2, 79.3, 52.1, 31.2, 28.5, 22.3, 19.8, 14.0. HRMS for  $C_{15}H_{18}O_2$   $[M+H]^+$  calcd. 231.1380, found 231.1385.

Preparation of **16q** :

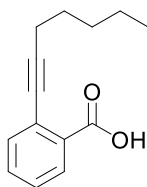

Compound **15q** (457 mg, 1.99 mmol) was dissolved in MeOH (6 ml) and THF (6 ml) at 0°C. KOH (1110 mg, 19.85 mmol) dissolved in H<sub>2</sub>O (6 ml) was then added and the mixture was stirred for 4.5 hr at rt under N<sub>2</sub>. To workup, the mixture was acidified to pH~3 with 1M HCl solution, which allowed the product to be extracted with EtOAc. The organic layer was washed with H<sub>2</sub>O, brine, dried over sodium sulfate, and evaporated under vacuum. Flash column chromatography using a gradient of 0-50% EtOAc in Hex was used to purify the desired compound. Yield: 347 mg, 80%. *R<sub>f</sub>*=0.53 (EtOAc/Hex, 1:1). <sup>1</sup>H NMR (CDCl<sub>3</sub>, 300 MHz) δ 8.08 (d, *J*= 7.9, 1H), 7.56-7.34 (m, 3H), 2.50 (t, *J*= 7.0, 2H), 1.71-1.61 (m, 2H), 1.52-1.31 (m, 4H), 0.93 (t, *J*= 7.1, 3H); <sup>13</sup>C NMR (CDCl<sub>3</sub>, 75 MHz): δ 170.4, 134.5, 132.6, 131.5, 130.9, 127.7, 124.7, 98.3, 79.1, 31.2, 28.2, 22.3, 19.8, 14.0. HRMS for C<sub>14</sub>H<sub>16</sub>O<sub>2</sub> [M+H]<sup>+</sup> calcd. 217.1223, found 217.1224.

Preparation of **1q** :

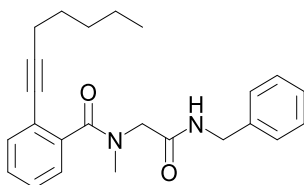

Compound **16q** (134 mg, 0.620 mmol), **2a** (144 mg, 0.806 mmol), EDC (192 mg, 1.24 mmol), HOBt (167 mg, 1.24 mmol) were dissolved in DMF (5 ml). NEt<sub>3</sub> (347 μl, 2.48 mmol) was then added and the mixture was stirred for 16 hr at room temperature under N<sub>2</sub>. To workup, the reaction was diluted with EtOAc and then the organic layer was washed with H<sub>2</sub>O, brine, dried over sodium sulfate, and evaporated under vacuum. Flash column chromatography using a gradient of 25-50% EtOAc in Hex was used to purify the desired compound. Yield: 181 mg, 78%. *R<sub>f</sub>*=0.26 (EtOAc/Hex, 1:1). <sup>1</sup>H NMR (CDCl<sub>3</sub>, 300 MHz, mixture of rotamers) δ 7.45-7.18 (m, 9H), 7.01 (br s, 1H), 4.51 (d, *J*= 5.9, 2H), 4.24 (s, 2H), 3.00 (s, 3H), 2.21 (t, *J*= 7.1, 2H), 1.55-1.45 (m, 2H), 1.37-1.24 (m, 4H), 0.90 (t, *J*= 7.0, 3H); <sup>13</sup>C NMR (CDCl<sub>3</sub>, 75 MHz): δ 171.7, 168.9, 138.3, 137.9, 132.8, 129.4, 128.9, 128.3, 127.9, 127.8, 127.6, 127.4, 126.7, 121.1, 94.7, 52.5, 43.5, 38.1, 34.0, 31.1, 28.4, 22.2, 19.3, 14.0. HRMS for C<sub>24</sub>H<sub>28</sub>N<sub>2</sub>O<sub>2</sub> [M+H]<sup>+</sup> calcd. 377.2224, found 377.2227.

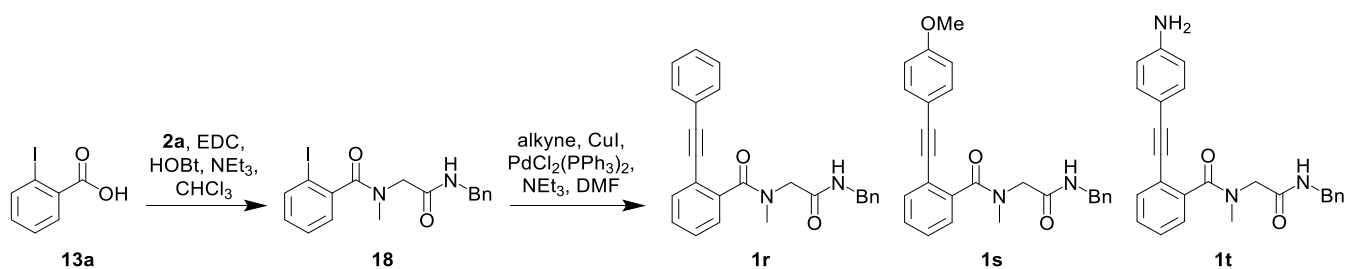

**Scheme S7.** Synthesis of **1r-t**

Preparation of **18** :

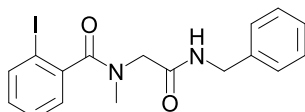

2-Iodobenzoic acid **13a** (320 mg, 1.26 mmol), **2a** (225 mg, 1.26 mmol), EDC (391 mg, 2.53 mmol), HOBt (341 mg, 2.53 mmol) were dissolved in  $\text{CHCl}_3$  (20 ml).  $\text{NEt}_3$  (353  $\mu\text{l}$ , 2.53 mmol) was then added and the mixture was stirred for 16 hr at  $30^\circ\text{C}$  under  $\text{N}_2$ . To workup, the reaction was diluted with EtOAc and then the organic layer was washed with  $\text{H}_2\text{O}$ , brine, dried over sodium sulfate, and evaporated under vacuum. Flash column chromatography using a gradient of 50-75% EtOAc in Hex was used to purify the desired compound. Yield: 383 mg, 74%.  $R_f=0.11$  (EtOAc/Hex, 1:1).  $^1\text{H NMR}$  ( $\text{CDCl}_3$ , 300 MHz, mixture of rotamers)  $\delta$  7.78 (d,  $J=8.0$ , 1H), 7.43-7.06 (m, 8H), 6.94 (br s, 1H), 4.48 (s, 2H), 3.85 (s, 2H), 2.91 (s, 3H);  $^{13}\text{C NMR}$  ( $\text{CDCl}_3$ , 75 MHz):  $\delta$  171.8, 168.2, 141.6, 139.3, 137.9, 130.8, 129.0, 128.8, 128.5, 127.9, 127.3, 92.3, 52.1, 43.9, 37.9. **HRMS** for  $\text{C}_{17}\text{H}_{17}\text{IN}_2\text{O}_2$   $[\text{M}+\text{Na}]^+$  calcd. 431.0227, found 431.0230.

Preparation of **1r** :

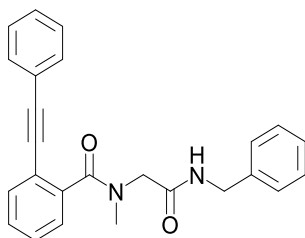

Compound **18** (98 mg, 0.240 mmol),  $\text{CuI}$  (9 mg, 0.048 mmol), and  $\text{PdCl}_2(\text{PPh}_3)_2$  (17 mg, 0.024 mmol) were dissolved in DMF (2 ml) and  $\text{NEt}_3$  (2 ml). The mixture was degassed with  $\text{N}_2$  for 5 min. Phenylacetylene (53  $\mu\text{l}$ , 0.480 mmol) was then added and the mixture was stirred for 16 hr at  $30^\circ\text{C}$  under  $\text{N}_2$ . To workup, the reaction was diluted with EtOAc and then the organic layer was washed with  $\text{H}_2\text{O}$ , brine, dried over sodium sulfate, and evaporated under vacuum. Flash column chromatography using a gradient of 10-50% EtOAc in Hex was used to purify the desired compound. Yield: 88 mg, 95%.  $R_f=0.21$  (EtOAc/Hex, 1:1).  $^1\text{H NMR}$  ( $\text{CDCl}_3$ , 300 MHz, mixture of rotamers)  $\delta$  7.59-7.04 (m, 14H), 6.96 (br s, 1H), 4.28 (s, 2H), 4.20 (d,  $J=5.6$ , 2H), 3.06 (s, 3H);  $^{13}\text{C NMR}$  ( $\text{CDCl}_3$ , 75 MHz):  $\delta$  171.4, 168.8, 138.2(2), 132.6, 131.9, 129.6, 129.2, 129.1, 128.8(2), 127.8, 127.4, 126.9, 122.4, 120.3, 93.0, 86.5, 52.5, 43.2, 38.1. **HRMS** for  $\text{C}_{25}\text{H}_{22}\text{N}_2\text{O}_2$   $[\text{M}+\text{Na}]^+$  calcd. 405.1573, found 405.1577.

Preparation of **1s** :

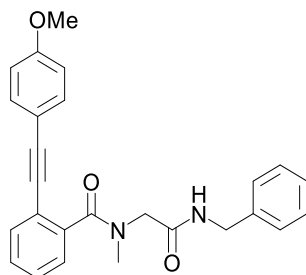

Compound **18** (172 mg, 0.422 mmol), CuI (16 mg, 0.084 mmol), and PdCl<sub>2</sub>(PPh<sub>3</sub>)<sub>2</sub> (30 mg, 0.042 mmol) were dissolved in DMF (2 ml) and NEt<sub>3</sub> (2 ml). The mixture was degassed with N<sub>2</sub> for 5 min. 4-Ethynylanisole (109 μl, 0.843 mmol) was then added and the mixture was stirred for 16 hr at 30°C under N<sub>2</sub>. To workup, the reaction was diluted with EtOAc and then the organic layer was washed with H<sub>2</sub>O, brine, dried over sodium sulfate, and evaporated under vacuum. Flash column chromatography using a gradient of 20-40% EtOAc in Hex was used to purify the desired compound. Yield: 45 mg, 26%. *R*<sub>f</sub>=0.21 (EtOAc/Hex, 1:1). <sup>1</sup>H NMR (CDCl<sub>3</sub>, 300 MHz, mixture of rotamers) δ 7.71-7.11 (m, 13H), 6.83 (d, *J*= 8.8, 2H), 4.29 (s, 2H), 4.21 (d, *J*= 5.6, 2H), 3.82 (s, 3H), 3.06 (s, 3H); <sup>13</sup>C NMR (CDCl<sub>3</sub>, 75 MHz): δ 171.5, 168.8, 160.4, 138.3, 138.0, 133.4, 132.5, 132.4, 132.2(3), 129.6, 128.8, 128.7, 128.6, 127.4(2), 126.8, 120.7, 114.4, 93.2, 85.4, 55.4, 52.4, 43.2, 38.1. HRMS for C<sub>26</sub>H<sub>24</sub>N<sub>2</sub>O<sub>3</sub> [M+H]<sup>+</sup> calcd. 413.1860, found 413.1866.

Preparation of **1t** :

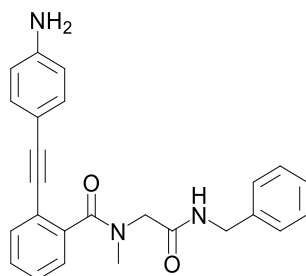

Compound **18** (81 mg, 0.199 mmol), CuI (8 mg, 0.040 mmol), and PdCl<sub>2</sub>(PPh<sub>3</sub>)<sub>2</sub> (14 mg, 0.020 mmol) were dissolved in DMF (2 ml) and NEt<sub>3</sub> (2 ml). The mixture was degassed with N<sub>2</sub> for 5 min. 4-Ethynylaniline (47 mg, 0.397 mmol) dissolved in DMF (0.5 ml) was then added and the mixture was stirred for 16 hr at 30°C under N<sub>2</sub>. To workup, the reaction was diluted with EtOAc and then the organic layer was washed with H<sub>2</sub>O, brine, dried over sodium sulfate, and evaporated under vacuum. Flash column chromatography using a gradient of 50-75% EtOAc in Hex was used to purify the desired compound. Yield: 80 mg, quan. *R*<sub>f</sub>=0.33 (EtOAc/Hex, 3:4). <sup>1</sup>H NMR (CDCl<sub>3</sub>, 300 MHz, mixture of rotamers) δ 7.55-6.98 (m, 13H), 6.58 (d, *J*= 8.5, 2H), 6.53 (br s, 1H), 4.29 (s, 2H), 4.20 (s, 2H), 3.05 (s, 3H); <sup>13</sup>C NMR (CDCl<sub>3</sub>, 75 MHz): δ 171.6, 168.9, 147.6, 138.4, 137.8, 133.3, 132.4, 129.5, 128.7, 128.5, 127.4(2), 126.8, 121.0, 114.9, 111.4, 94.1, 84.6, 52.4, 43.2, 38.1. HRMS for C<sub>25</sub>H<sub>23</sub>N<sub>3</sub>O<sub>2</sub> [M+H]<sup>+</sup> calcd. 398.1863, found 398.1867.

## 1.5.2 Endoxifen Derivatives

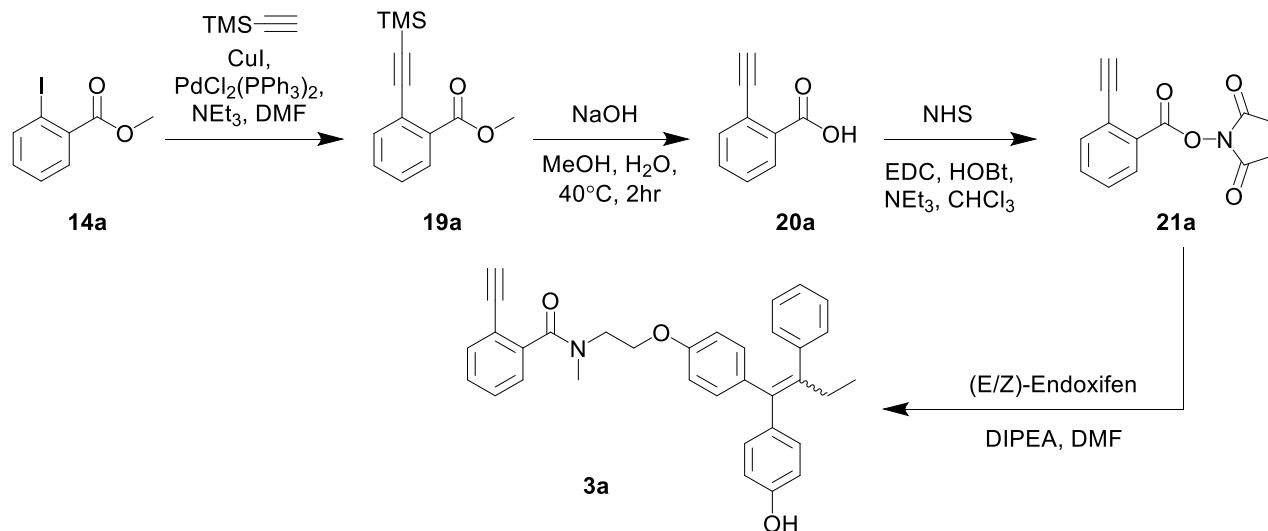

**Scheme S8.** Synthesis of **3a**

Preparation of **19a** :

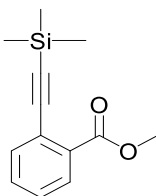

Compound **14a** (405 mg, 1.55 mmol), CuI (59 mg, 0.31 mmol), and PdCl<sub>2</sub>(PPh<sub>3</sub>)<sub>2</sub> (108 mg, 0.15 mmol) were dissolved in DMF (2 ml) and NEt<sub>3</sub> (2 ml). The mixture was degassed with N<sub>2</sub> for 5 min. (Trimethylsilyl)acetylene (430  $\mu$ l, 3.09 mmol) was then added and the mixture was stirred for 16 hr at 30°C under N<sub>2</sub>. To workup, the reaction was diluted with EtOAc and then the organic layer was washed with H<sub>2</sub>O, brine, dried over sodium sulfate, and evaporated under vacuum. Flash column chromatography using a gradient of 5-10% EtOAc in Hex was used to purify the desired compound. Yield: 346 mg, 96%. *R*<sub>f</sub>=0.41 (EtOAc/Hex, 1:10). <sup>1</sup>H NMR (CDCl<sub>3</sub>, 300 MHz)  $\delta$  7.91 (d, *J* = 7.7 Hz, 1H), 7.59 (d, *J* = 7.5 Hz, 1H), 7.47-7.34 (m, 2H), 3.93 (s, 3H), 0.28 (s, 9H); <sup>13</sup>C NMR (CDCl<sub>3</sub>, 75 MHz):  $\delta$  167.2, 134.8, 132.8, 131.7, 130.5, 128.4, 123.4, 103.5, 99.8, 52.1, 0.1.

**HRMS** for C<sub>13</sub>H<sub>16</sub>O<sub>2</sub>Si [M+H]<sup>+</sup> calcd. 233.0992, found 233.0992.

Preparation of **20a** :

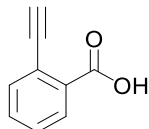

Compound **19a** (366 mg, 1.58 mmol) was dissolved in MeOH (5 ml), followed by the addition of aqueous NaOH (5 ml of 2.0M solution). The mixture was then stirred for 2 hr at 40°C. To workup, the H<sub>2</sub>O layer was washed with EtOAc (1 $\times$ ) and acidified to pH~1 with 1M HCl, which allowed the product to be extracted with EtOAc. The organic layer was then washed with H<sub>2</sub>O, brine, dried over sodium sulfate, and evaporated under vacuum. Flash column chromatography using a gradient of 30-50% EtOAc in Hex was used to purify the desired compound. Yield: 165 mg, 48%. *R*<sub>f</sub>=0.14 (EtOAc/Hex, 1:1). Characterization matched a previous report of this known compound.<sup>13</sup> <sup>1</sup>H NMR (CDCl<sub>3</sub>, 300 MHz)  $\delta$  11.69 (br s, 1H), 8.10 (d, *J* = 7.8 Hz, 1H), 7.67 (d, *J* = 7.7 Hz, 1H), 7.55 (td, *J* = 1.4, 7.5 Hz, 1H), 7.46 (td, *J* = 1.4, 7.7 Hz, 1H), 3.46 (s, 1H).

Preparation of **21a** :

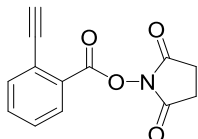

Compound **20a** (27 mg, 0.185 mmol), *N*-hydroxysuccinimide (32 mg, 0.277 mmol), EDC (71 mg, 0.370 mmol), HOBt (50 mg, 0.370 mmol) were dissolved in  $\text{CHCl}_3$  (5 ml).  $\text{NEt}_3$  (126  $\mu\text{l}$ , 0.740 mmol) was then added and the mixture was stirred for 16 hr at room temperature under  $\text{N}_2$ . To workup, the solvent was evaporated under vacuum and the mixture redissolved in EtOAc. The organic layer was then washed with  $\text{H}_2\text{O}$ , brine, dried over sodium sulfate, and evaporated under vacuum. Flash column chromatography using a gradient of 0-50% EtOAc in Hex was used to purify the desired compound. Yield: 39 mg, 87%.  $R_f=0.40$  (EtOAc/Hex, 1:1).  $^1\text{H NMR}$  ( $\text{CDCl}_3$ , 300 MHz)  $\delta$  8.16 (d,  $J = 8.2$  Hz, 1H), 7.70-7.57 (m, 2H), 7.47 (t,  $J = 7.7$  Hz, 1H), 3.45 (s, 1H), 2.89 (s, 4H);  $^{13}\text{C NMR}$  ( $\text{CDCl}_3$ , 75 MHz):  $\delta$  169.4, 160.9, 135.5, 133.9, 131.3, 128.9, 127.1, 124.6, 84.3, 80.9, 25.7.

**HRMS** for  $\text{C}_{13}\text{H}_9\text{NO}_4$   $[\text{M}+\text{Na}]^+$  calcd. 266.0424, found 266.0421.

Preparation of **3a** :

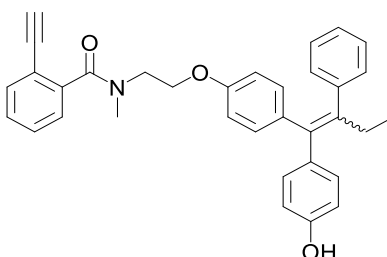

Compound **21a** (6.3 mg, 0.026 mmol) and (*E/Z*)-Endoxifen (4.7 mg, 0.019 mmol) were dissolved in DMF (300  $\mu\text{l}$ ). DIPEA (8  $\mu\text{l}$ , 0.043 mmol) was then added and the mixture was stirred for 16 hr at room temperature. To workup, additional DMF (1 ml) was added. The reaction was then filtered and directly purified by reverse phase HPLC using method 6 (retention time  $\sim 27.4$  min). Yield: 4.1 mg, 42%.  $^1\text{H NMR}$  ( $\text{CDCl}_3$ , 400 MHz, mixture of rotamers)  $\delta$  7.54-7.46 (m, 1H), 7.41-7.26 (m, 3H), 7.17-7.05 (m, 7H), 6.88 (d,  $J = 8.7$  Hz, 1H), 6.81-6.67 (m, 3H), 6.53 (d,  $J = 8.8$  Hz, 1H), 6.48-6.40 (m, 2H), 4.31 (t,  $J = 5.0$  Hz, 1H), 4.15 (t,  $J = 4.9$  Hz, 1H), 3.77-3.71 (m, 2H), 3.07 (s, 3H), 2.55 (s, 1H), 2.50-2.42 (m, 2H), 0.92 (t,  $J = 7.4$  Hz, 3H);  $^{13}\text{C NMR}$  ( $\text{CDCl}_3$ , 75 MHz):  $\delta$  170.5, 157.6, 156.8, 154.7, 153.8, 142.9, 141.5, 140.3, 138.0, 136.4, 136.1, 133.1, 132.9, 132.3, 132.2, 130.9, 129.9, 129.4, 129.0, 128.1, 126.4, 126.2, 119.2, 115.2, 114.5, 114.2, 113.4, 81.0, 80.7, 68.1, 47.7, 30.4, 29.1, 13.7. **HRMS** for  $\text{C}_{34}\text{H}_{31}\text{NO}_3$   $[\text{M}+\text{H}]^+$  calcd. 502.2377, found 502.2389.

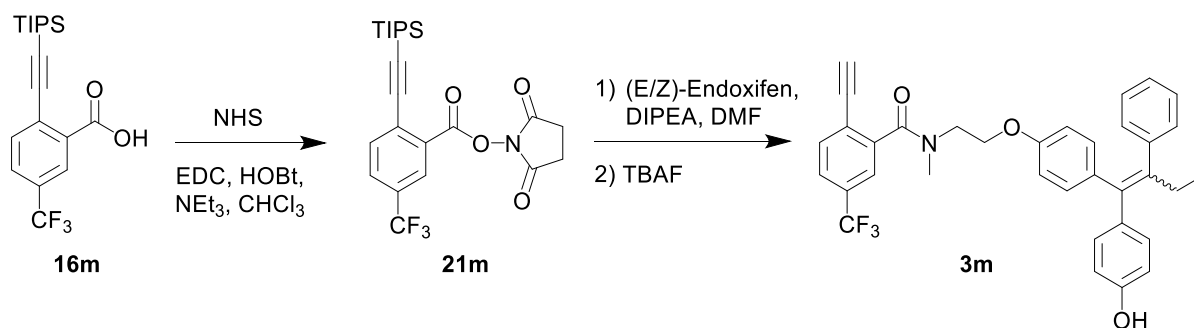

### Scheme S9. Synthesis of **3m**

Preparation of **21m** :

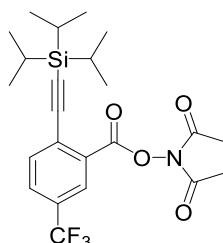

Compound **16m** (170 mg, 0.459 mmol), *N*-hydroxysuccinimide (79 mg, 0.689 mmol), EDC (176 mg, 0.918 mmol), HOBt (124 mg, 0.918 mmol) were dissolved in  $\text{CHCl}_3$  (5 ml).  $\text{NEt}_3$  (312  $\mu\text{l}$ , 1.837 mmol) was then added and the mixture was stirred for 16 hr at room temperature under  $\text{N}_2$ . To workup, the solvent was evaporated under vacuum and the mixture redissolved in EtOAc. The organic layer was then washed with  $\text{H}_2\text{O}$ , brine, dried over sodium sulfate, and evaporated under vacuum. Flash column chromatography using a gradient of 15-25% EtOAc in Hex was used to purify the desired compound. Yield: 78 mg, 37%.  $R_f = 0.31$  (EtOAc/Hex, 1:4).  $^1\text{H NMR}$  ( $\text{CDCl}_3$ , 300 MHz)  $\delta$  8.35 (s, 1H), 7.82-7.73 (m, 2H), 2.91 (s, 4H), 1.12 (s, 21H);  $^{13}\text{C NMR}$  ( $\text{CDCl}_3$ , 75 MHz):  $\delta$  169.1, 159.8, 136.0, 130.1, 130.0, 129.2, 128.3, 127.6, 121.5, 103.4, 102.5, 25.7, 18.6, 11.2. **HRMS** for  $\text{C}_{23}\text{H}_{28}\text{F}_3\text{NO}_4\text{Si}$  [ $\text{M}+\text{Na}$ ] $^+$  calcd. 490.1632, found 490.1634.

Preparation of **3m** :

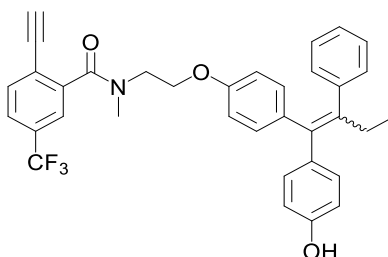

Compound **21m** (6.2 mg, 0.013 mmol) and (E/Z)-Endoxifen (2.5 mg, 0.007 mmol) were dissolved in DMF (300  $\mu\text{l}$ ), followed by the addition of DIPEA (3  $\mu\text{l}$ , 0.013 mmol). After stirring for 16 hr at room temperature, TBAF (400  $\mu\text{l}$  of 1M solution in THF) was added to the mixture, which was allowed to further stir for 1 hr. To workup, additional DMF (1 ml) was added. The reaction was then filtered and directly purified by reverse phase HPLC using method 7 (retention time  $\sim$ 29.9 min). Yield: 3.3 mg, 87%.  $^1\text{H NMR}$  ( $\text{CDCl}_3$ , 400 MHz, mixture of rotamers)  $\delta$  7.66-7.54 (m, 3H), 7.18-7.05 (m, 7H), 6.89 (d,  $J = 8.6$  Hz, 1H), 6.83-6.68 (m, 3H), 6.56-6.43 (m, 2H), 4.32 (t,  $J = 4.9$  Hz, 1H), 4.16 (t,  $J = 4.7$  Hz, 1H), 3.94-3.79 (m, 2H), 3.01 (s, 3H), 2.62 (s, 1H), 2.51-2.42 (m, 2H), 0.95-0.88 (m, 3H);  $^{13}\text{C NMR}$  ( $\text{CDCl}_3$ , 75 MHz):  $\delta$  168.9, 157.5, 156.7, 155.1, 154.0, 142.8, 141.4, 140.8, 138.1, 137.9, 136.9, 136.6, 136.0, 133.6, 133.3, 132.3, 132.2, 130.9, 129.9, 128.1, 126.2, 125.8, 123.5, 123.0, 115.3, 114.6, 114.1, 113.4, 83.5, 83.3, 66.7, 47.8, 38.9, 29.1, 13.6. **HRMS** for  $\text{C}_{35}\text{H}_{30}\text{F}_3\text{NO}_3$  [ $\text{M}+\text{H}$ ] $^+$  calcd. 570.2251, found 570.2232.



### 1.5.3 Doxorubicin Derivatives

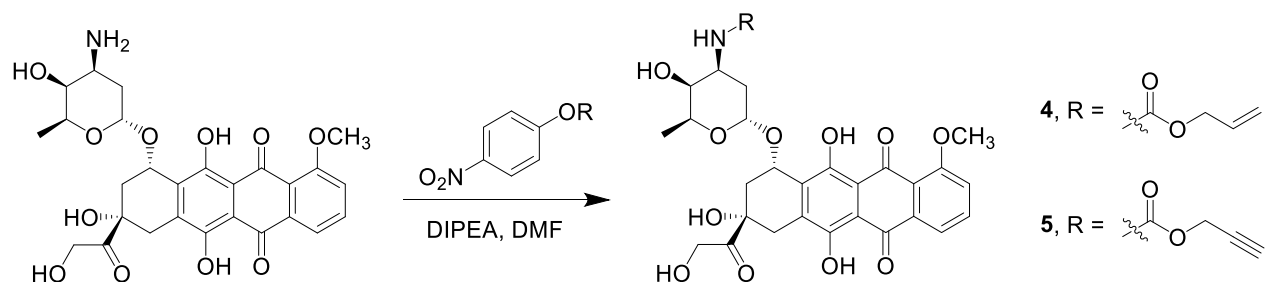

**Scheme S10.** Synthesis of **4** and **5**

Preparation of **4** :

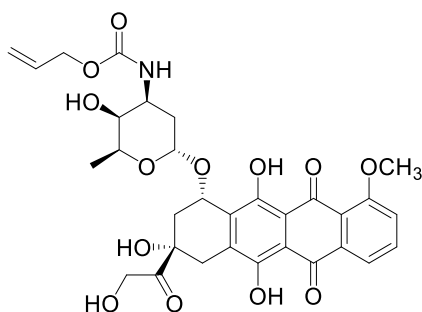

O-(4-Nitrophenyl)-O'-allylcarbonate (18.1 mg, 0.081 mmol), which was prepared according to literature,<sup>14</sup> was added to Doxorubicin hydrochloride (47 mg, 0.081 mmol) dissolved in DMF (1 ml). DIPEA (28  $\mu$ l, 0.162 mmol) was then added and the mixture was stirred for 16 hr at room temperature. To workup, additional DMF (1 ml) was added. The reaction was then filtered and directly purified by reverse phase HPLC using method 8 (retention time  $\sim$ 20.8 min). Yield: 20.6 mg, 40%. Characterization matched a previous report of this known compound.<sup>15</sup> **<sup>1</sup>H NMR** (Acetone-*d*<sub>6</sub>, 400 MHz)  $\delta$  8.02 (dd, *J* = 7.7, 1.1 Hz, 1H), 7.95-7.91 (m, 1H), 7.67 (d, *J* = 8.4 Hz, 1H), 6.00-5.83 (m, 2H), 5.47 (d, *J* = 3.7 Hz, 1H), 5.29-5.22 (m, 2H), 5.11 (d, *J* = 9.9 Hz, 1H), 4.91 (s, 1H), 4.77-4.73 (m, 2H), 4.44 (d, *J* = 5.4 Hz, 2H), 4.29-4.24 (m, 1H), 4.07 (s, 3H), 4.05-3.98 (m, 1H), 3.90-3.83 (m, 1H), 3.67-3.63 (m, 2H), 3.21 (d, *J* = 18.8 Hz, 1H), 3.06 (d, *J* = 18.7 Hz, 1H), 2.53-2.46 (m, 1H), 2.27-2.22 (m, 1H), 2.02-1.99 (m, 1H), 1.78-1.71 (m, 1H), 1.28 (d, *J* = 6.6 Hz, 3H). **LRMS** for C<sub>31</sub>H<sub>33</sub>NO<sub>13</sub> [M+Na]<sup>+</sup> calcd. 650.1, found 650.1.

Preparation of **5** :

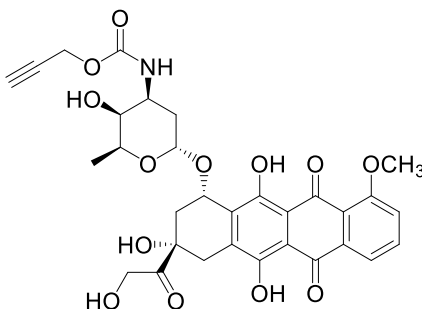

O-(4-Nitrophenyl)-O'-propargylcarbonate (13.7 mg, 0.062 mmol), which was prepared according to literature,<sup>16</sup> was added to Doxorubicin hydrochloride (39.5 mg, 0.068 mmol) dissolved in DMF (1 ml). DIPEA (16  $\mu$ l, 0.093 mmol) was then added and the mixture was stirred for 16 hr at room temperature. To workup, additional DMF (1 ml) was added. The reaction was then filtered and directly purified by reverse phase HPLC using method 8 (retention time  $\sim$ 19.3 min). Yield: 17.7 mg, 46%. Characterization matched a previous report of this known compound.<sup>16</sup> **<sup>1</sup>H NMR** (Acetone-*d*<sub>6</sub>, 400 MHz)  $\delta$  8.02 (dd, *J* = 7.7, 0.9 Hz, 1H), 7.95-7.91 (m, 1H), 7.67 (d, *J* = 8.6 Hz, 1H), 5.48 (d, *J* = 3.8 Hz, 1H), 5.29-5.26 (m, 1H), 4.91 (s, 1H), 4.77-4.73 (m, 2H), 4.59 (d, *J* = 2.4 Hz, 2H), 4.30-4.24 (m, 1H), 4.07 (s, 3H), 4.05-4.01 (m, 1H), 3.92-3.83 (m, 1H), 3.69-3.63 (m, 2H), 3.22 (dd, *J* = 18.7, 1.7 Hz, 1H), 3.06 (d, *J* = 18.7 Hz, 1H), 2.53 (s, 1H), 2.51-2.47 (m, 1H), 2.27 (d, *J* = 4.6 Hz, 1H), 1.97 (s, 2H), 1.78-1.71 (m, 1H), 1.28 (d, *J* = 6.6 Hz, 3H). **LRMS** for C<sub>31</sub>H<sub>31</sub>NO<sub>13</sub> [M+Na]<sup>+</sup> calcd. 648.1, found 648.1.

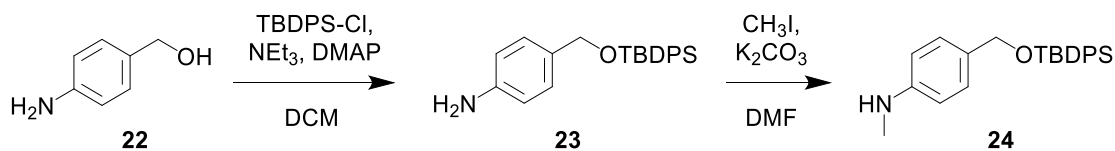

**Scheme S11.** Synthesis of **24**

Preparation of **23** :

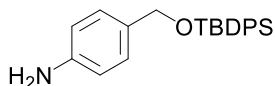

Compound **22** (200 mg, 1.62 mmol), NEt<sub>3</sub> (680 μl, 4.86 mmol), and DMAP (60 mg, 0.486 mmol) were dissolved in DCM (10 ml). TBDPS-Cl (520 μl, 2.00 mmol) was then added and the mixture was stirred for 16 hr at room temperature under N<sub>2</sub>. To workup, the reaction was quenched with H<sub>2</sub>O and the mixture was extracted with EtOAc (3×). The combined organic layers were dried over sodium sulfate and evaporated under vacuum. Flash column chromatography using a gradient of 10-20% EtOAc in Hex was used to purify the desired compound. Yield: 547 mg, 93%. *R*<sub>f</sub>=0.19 (EtOAc/Hex, 1:5). Characterization matched a previous report of this known compound.<sup>17</sup> <sup>1</sup>H NMR (CDCl<sub>3</sub>, 300 MHz) δ 7.72-7.65 (m, 4H), 7.45-7.34 (m, 6H), 7.12 (d, *J* = 8.3 Hz, 2H), 6.66 (d, *J* = 8.4 Hz, 2H), 4.66 (s, 2H), 3.61 (s, 2H), 1.07 (s, 9H).

Preparation of **24** :

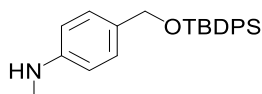

Compound **23** (668 mg, 1.85 mmol) and K<sub>2</sub>CO<sub>3</sub> (383 mg, 2.77 mmol) were dissolved in DMF (5 ml) and stirred for 5 min. CH<sub>3</sub>I (115 μl, 1.85 mmol) was then added in 3 portions of 40 μl that were separated by 15 minutes each time. The mixture was then stirred for 2 hr at 50°C under N<sub>2</sub>. To workup, the reaction was diluted with EtOAc and then the organic layer was washed with H<sub>2</sub>O, brine, dried over sodium sulfate, and evaporated under vacuum. Flash column chromatography using a gradient of 7-15% EtOAc in Hex was used to purify the desired compound. Yield: 260 mg, 38%. *R*<sub>f</sub>=0.38 (EtOAc/Hex, 1:5). <sup>1</sup>H NMR (CDCl<sub>3</sub>, 300 MHz) δ 7.73-7.67 (m, 4H), 7.45-7.34 (m, 6H), 7.16 (d, *J* = 8.4 Hz, 2H), 6.59 (d, *J* = 8.5 Hz, 2H), 4.66 (s, 2H), 2.84 (s, 3H), 1.07 (s, 9H); <sup>13</sup>C NMR (CDCl<sub>3</sub>, 75 MHz): δ 148.7, 135.9, 134.1, 130.1, 129.8, 127.9, 127.8, 112.4, 65.7, 31.0, 26.9, 19.4. HRMS for C<sub>24</sub>H<sub>29</sub>NOSi [M+H]<sup>+</sup> calcd. 376.2091, found 376.2100.

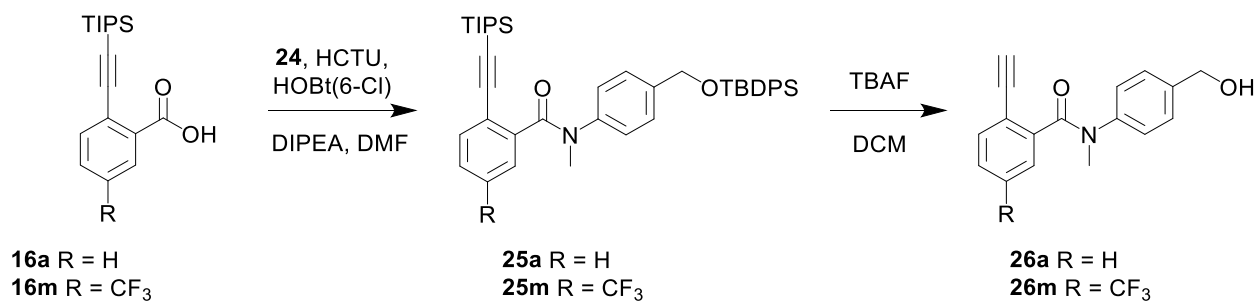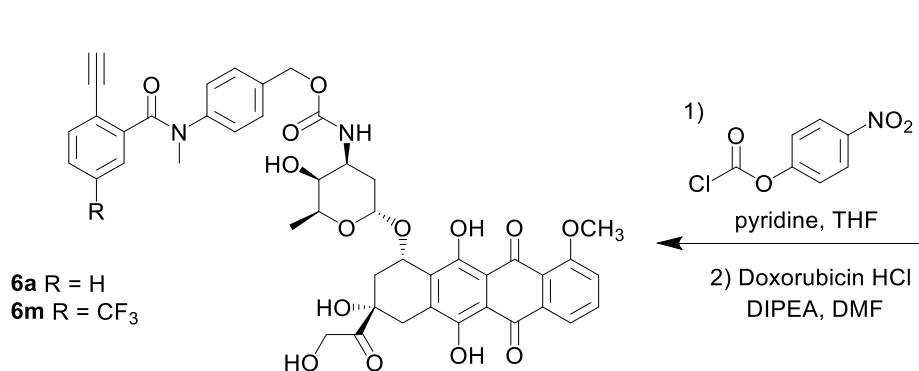

**Scheme S12.** Synthesis of **6a,m**

Preparation of **25a** :

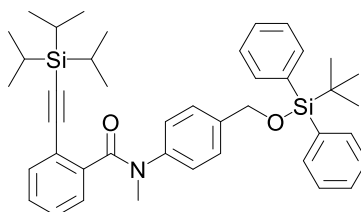

Compound **24** (165 mg, 0.440 mmol), compound **16a** (133 mg, 0.440 mmol), HCTU (363 mg, 0.879 mmol), HOBt(6-Cl) (149 mg, 0.879 mmol) were dissolved in DMF (7 ml). DIPEA (246  $\mu$ l, 1.76 mmol) was then added and the mixture was stirred for 16 hr at room temperature under N<sub>2</sub>. To workup, the reaction was diluted with EtOAc and then the organic layer was washed with H<sub>2</sub>O, brine, dried over sodium sulfate, and evaporated under vacuum. Flash column chromatography using a gradient of 0-15% EtOAc in Hex was used to purify the desired compound. Yield: 163 mg, 56%. *R*<sub>f</sub>=0.18 (EtOAc/Hex, 1:5). <sup>1</sup>H NMR (CDCl<sub>3</sub>, 400 MHz)  $\delta$  7.70-7.57 (m, 4H), 7.48-7.29 (m, 8H), 7.20-7.05 (m, 6H), 4.62 (s, 2H), 3.46 (s, 3H), 1.17 (s, 21H), 1.05 (s, 9H); <sup>13</sup>C NMR (CDCl<sub>3</sub>, 75 MHz):  $\delta$  140.0, 135.8, 133.5, 133.0, 129.9, 127.9, 127.0, 126.6, 95.1, 65.1, 37.4, 26.9, 19.3, 18.8, 11.4. HRMS for C<sub>42</sub>H<sub>53</sub>NO<sub>2</sub>Si<sub>2</sub> [M+H]<sup>+</sup> calcd. 660.3688, found 660.3680.

Preparation of **25m** :

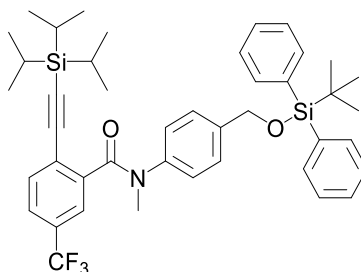

Compound **24** (180 mg, 0.481 mmol), compound **16m** (178 mg, 0.481 mmol), HCTU (397 mg, 0.962 mmol), HOBt(6-Cl) (163 mg, 0.962 mmol) were dissolved in DMF (5 ml). DIPEA (163  $\mu$ l, 0.962 mmol) was then added and the mixture was stirred for 16 hr at room temperature under N<sub>2</sub>. To workup, the reaction was diluted with

EtOAc and then the organic layer was washed with H<sub>2</sub>O, brine, dried over sodium sulfate, and evaporated under vacuum. Flash column chromatography using a gradient of 0-10% EtOAc in Hex was used to purify the desired compound. Yield: 116 mg, 33%. *R<sub>f</sub>*=0.31 (EtOAc/Hex, 1:5). <sup>1</sup>H NMR (CDCl<sub>3</sub>, 300 MHz) δ 7.74-7.69 (m, 1H), 7.66-7.57 (m, 3H), 7.44-7.30 (m, 10H), 7.16-7.11 (m, 3H), 4.63 (s, 2H), 3.47 (s, 3H), 1.18 (s, 21H), 1.04 (s, 9H); <sup>13</sup>C NMR (CDCl<sub>3</sub>, 75 MHz): δ 142.0, 141.3, 140.7, 135.9, 135.7, 135.0, 133.5, 133.4, 130.2, 130.0, 129.9, 127.9, 127.1, 126.8, 98.5, 65.0, 37.4, 26.8, 26.6, 19.3, 18.7, 17.7, 12.3, 11.4. HRMS for C<sub>43</sub>H<sub>52</sub>F<sub>3</sub>NO<sub>2</sub>Si<sub>2</sub> [M+H]<sup>+</sup> calcd. 728.3561, found 728.3555.

Preparation of **26a** :

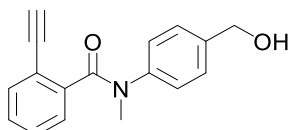

Compound **25a** (343 mg, 0.520 mmol) was dissolved in DCM (2 ml). TBAF (2.6 ml of 1.0M solution, 2.60 mmol) was then added and the mixture was stirred for 1 hr at room temperature under N<sub>2</sub>. To workup, the reaction was diluted with EtOAc and then the organic layer was washed with H<sub>2</sub>O, brine, dried over sodium sulfate, and evaporated under vacuum. Flash column chromatography using a gradient of 50-75% EtOAc in Hex was used to purify the desired compound. Yield: 129 mg, 93%. *R<sub>f</sub>*=0.38 (EtOAc/Hex, 3:4). <sup>1</sup>H NMR (CDCl<sub>3</sub>, 400 MHz) δ 7.37-7.30 (m, 2H), 7.21-7.02 (m, 7H), 4.55 (s, 2H), 3.49 (s, 3H), 3.28 (s, 1H); <sup>13</sup>C NMR (CDCl<sub>3</sub>, 75 MHz): δ 169.9, 139.9, 133.1, 128.6, 128.5, 128.4, 127.5, 127.1, 126.5, 81.6, 81.2, 64.5, 37.4. HRMS for C<sub>17</sub>H<sub>15</sub>NO<sub>2</sub> [M+H]<sup>+</sup> calcd. 266.1176, found 266.1170.

Preparation of **26m** :

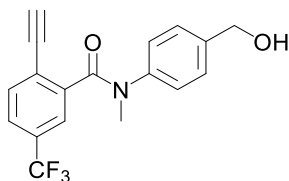

Compound **25m** (116 mg, 0.156 mmol) was dissolved in DCM (2 ml). TBAF (239 μl of 1.0M solution, 0.239 mmol) was then added and the mixture was stirred for 2 hr at 40°C. To workup, the reaction was diluted with EtOAc and then the organic layer was washed with H<sub>2</sub>O, brine, dried over sodium sulfate, and evaporated under vacuum. Flash column chromatography using a gradient of 15-30% EtOAc in Hex was used to purify the desired compound. Yield: 27.9 mg, 52%. *R<sub>f</sub>*=0.20 (EtOAc/Hex, 1:1). <sup>1</sup>H NMR (CDCl<sub>3</sub>, 300 MHz) δ 7.51-7.31 (m, 4H), 7.24-7.05 (m, 4H), 4.58 (s, 2H), 3.50 (s, 3H), 3.42 (s, 1H); <sup>13</sup>C NMR (CDCl<sub>3</sub>, 75 MHz): δ 168.4, 142.5, 141.3, 140.4, 133.6, 127.7, 127.3, 125.3, 124.7, 123.6, 121.7, 83.7, 80.4, 64.5, 37.5. HRMS for C<sub>18</sub>H<sub>14</sub>F<sub>3</sub>NO<sub>2</sub> [M+H]<sup>+</sup> calcd. 334.1049, found 334.1046.

Preparation of **6a** :

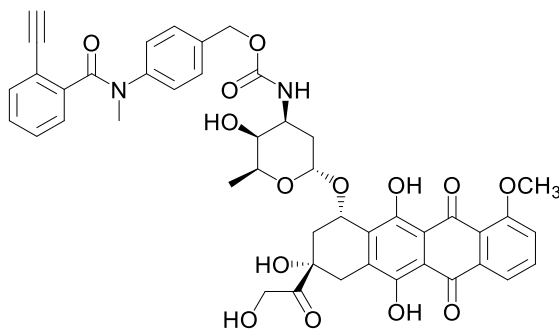

4-Nitrophenyl chloroformate (8.3 mg, 0.0413 mmol) was dissolved in THF (300 μl) and cooled to 0°C on an ice bath. Pyridine (4 μl, 0.0413 mmol) was added and after stirring for 20 min, compound **26a** (7.3 mg, 0.0275 mmol) dissolved in THF (200 μl) was added and the mixture was stirred for 16 hr at room temperature. To workup, THF was removed and the residue was redissolved in EtOAc. The organic layer was then washed with H<sub>2</sub>O, brine, dried over sodium sulfate, and evaporated under vacuum. Flash column chromatography using a gradient of 25-

50% EtOAc in Hex was used to purify the desired intermediate. Yield: 5.2 mg, 44%.  $R_f=0.67$  (EtOAc/Hex, 3:4).

**HRMS** for  $C_{24}H_{18}N_2O_6$   $[M+H]^+$  calcd. 431.1238, found 431.1234.

The intermediate compound and doxorubicin hydrochloride (7.0 mg, 0.012 mmol) were dissolved in DMF (300  $\mu$ l). DIPEA (4  $\mu$ l, 0.024 mmol) was then added and the mixture was stirred for 16 hr at room temperature. To workup, additional DMF (1 ml) was added. The reaction was then filtered and directly purified by reverse phase HPLC using method 8 (retention time  $\sim$ 28.1 min). Yield: 5.4 mg, 53%.  $^1H$  NMR (DMSO- $d_6$ , 400 MHz)  $\delta$  7.96-7.89 (m, 2H), 7.70-7.64 (m, 1H), 7.33-7.08 (m, 7H), 6.90 (d,  $J$  = 7.7 Hz, 1H), 5.46 (s, 1H), 5.27-5.19 (m, 1H), 4.99-4.93 (m, 1H), 4.90-4.77 (m, 3H), 4.70 (d,  $J$  = 5.3 Hz, 1H), 4.57 (d,  $J$  = 6.0 Hz, 2H), 4.33 (s, 1H), 4.15 (q,  $J$  = 6.8 Hz, 1H), 3.99 (s, 3H), 3.43 (s, 3H), 2.98 (d,  $J$  = 5.0 Hz, 2H), 2.23-2.08 (m, 2H), 1.88-1.76 (m, 1H), 1.49-1.40 (m, 1H), 1.12 (d,  $J$  = 6.5 Hz, 3H);  $^{13}C$  NMR (DMSO- $d_6$ , 75 MHz):  $\delta$  215.1, 187.9, 187.8, 169.2, 162.2, 157.2, 156.4, 156.1, 144.5, 142.1, 136.7, 136.5, 136.1, 133.4, 129.3, 129.1, 128.3, 127.7, 122.1, 120.6, 120.1, 119.5, 112.3, 112.2, 112.1, 99.8, 92.0, 82.7, 77.7, 76.9, 71.1, 70.0, 63.6, 63.1, 61.5, 56.7, 48.1, 40.7, 30.4, 27.8, 17.1. **HRMS** for  $C_{45}H_{42}N_2O_{14}$   $[M+Na]^+$  calcd. 857.2528, found 857.2520.

Preparation of **6m** :

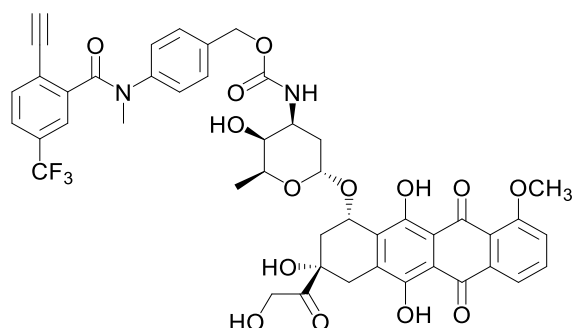

4-Nitrophenyl chloroformate (3.2 mg, 0.0158 mmol) was dissolved in THF (300  $\mu$ l) and cooled to 0°C on an ice bath. Pyridine (2  $\mu$ l, 0.0158 mmol) was added and after stirring for 20 min, compound **26m** (3.5 mg, 0.0105 mmol) dissolved in THF (200  $\mu$ l) was added and the mixture was stirred for 16 hr at room temperature. To workup, THF was removed and the residue was redissolved in EtOAc. The organic layer was then washed with H<sub>2</sub>O, brine, dried over sodium sulfate, and evaporated under vacuum. Flash column chromatography using a gradient of 25-50% EtOAc in Hex was used to purify the desired intermediate. Yield: 2.9 mg, 54%.  $R_f=0.63$  (EtOAc/Hex, 1:1). **HRMS** for  $C_{25}H_{17}F_3N_2O_6$   $[M+Na]^+$  calcd. 521.0931, found 521.0922.

The intermediate compound and doxorubicin hydrochloride (7.0 mg, 0.0114 mmol) were dissolved in DMF (300  $\mu$ l). DIPEA (3  $\mu$ l, 0.0171 mmol) was then added and the mixture was stirred for 16 hr at room temperature. To workup, additional DMF (1 ml) was added. The reaction was then filtered and directly purified by reverse phase HPLC using method 9 (retention time  $\sim$ 20.9 min). Yield: 3.9 mg, 75%.  $^1H$  NMR (DMSO- $d_6$ , 400 MHz)  $\delta$  7.94-7.83 (m, 2H), 7.73 (s, 1H), 7.62-7.48 (m, 3H), 7.45-7.35 (m, 1H), 7.24-7.07 (m, 3H), 6.88 (d,  $J$  = 7.8 Hz, 1H), 5.42 (s, 1H), 5.21 (s, 1H), 4.98-4.78 (m, 4H), 4.72-4.66 (m, 1H), 4.60-4.56 (m, 3H), 4.18-4.10 (m, 1H), 3.97 (s, 3H), 3.73-3.62 (m, 1H), 3.43 (s, 3H), 2.95 (d,  $J$  = 7.5 Hz, 2H), 2.22-2.09 (m, 2H), 1.87-1.77 (m, 1H), 1.49-1.38 (m, 1H), 1.12 (d,  $J$  = 6.4 Hz, 3H);  $^{13}C$  NMR (DMSO- $d_6$ , 75 MHz):  $\delta$  214.0, 186.7, 180.4, 166.9, 161.0, 156.3, 155.3, 142.3, 141.5, 136.3, 136.2, 135.7, 134.9, 133.3, 128.1, 127.1, 125.3, 125.2, 124.7, 124.6, 123.1, 120.2, 120.1, 119.8, 119.1, 110.9, 110.7, 110.5, 100.4, 87.0, 80.2, 75.0, 70.0, 68.0, 66.7, 64.3, 63.7, 56.6, 47.2, 36.7, 32.1, 29.8, 17.0. **HRMS** for  $C_{46}H_{41}F_3N_2O_{14}$   $[M+Na]^+$  calcd. 925.2402, found 925.2412.

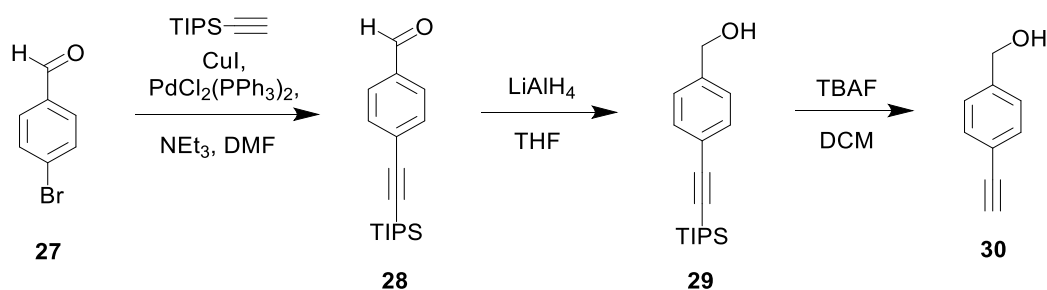

**Scheme S13.** Synthesis of **30**

Preparation of **28** :

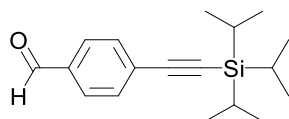

Compound **27** (500 mg, 2.702 mmol), CuI (103 mg, 0.540 mmol), and PdCl<sub>2</sub>(PPh<sub>3</sub>)<sub>2</sub> (189 mg, 0.270 mmol) were dissolved in DMF (2 ml) and NEt<sub>3</sub> (2 ml). The mixture was degassed with N<sub>2</sub> for 5 min. (Triisopropylsilyl)acetylene (1.2 ml, 5.404 mmol) was then added and the mixture was stirred for 16 hr at 40°C under N<sub>2</sub>. To workup, the reaction was diluted with EtOAc and then the organic layer was washed with H<sub>2</sub>O, brine, dried over sodium sulfate, and evaporated under vacuum. Flash column chromatography using a gradient of 0-10% EtOAc in Hex was used to purify the desired compound. Yield: 770 mg, quan. *R*<sub>f</sub>=0.52 (EtOAc/Hex, 1:10). Characterization matched a previous report of this known compound.<sup>18</sup> <sup>1</sup>H NMR (CD<sub>2</sub>Cl<sub>2</sub>, 300 MHz) δ 9.99 (s, 1H), 7.83 (d, *J* = 8.2 Hz, 2H), 7.63 (d, *J* = 8.1 Hz, 2H), 1.15 (s, 21H).

Preparation of **29** :

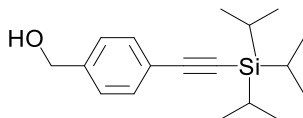

LiAlH<sub>4</sub> (205 mg, 5.404 mmol) was suspended in THF (10 ml) and cooled to 0°C on an ice bath. Compound **28** (770 mg, 2.702 mmol) dissolved in THF (20 ml) was then added dropwise and the mixture was stirred for 2 hr at room temperature under N<sub>2</sub>. To workup, the mixture was cooled on an ice bath, followed by the addition of H<sub>2</sub>O dropwise to quench the reaction. When bubbles stopped forming, HCl (2 ml of a 1N solution) was added, followed by the addition of EtOAc. The organic layer was washed with H<sub>2</sub>O, brine, dried over sodium sulfate, and evaporated under vacuum. Flash column chromatography using a gradient of 10-25% EtOAc in Hex was used to purify the desired compound. Yield: 463 mg, 60%. *R*<sub>f</sub>=0.31 (EtOAc/Hex, 1:4). Characterization matched a previous report of this known compound.<sup>19</sup> <sup>1</sup>H NMR (CDCl<sub>3</sub>, 300 MHz) δ 7.47 (d, *J* = 8.1 Hz, 2H), 7.29 (d, *J* = 8.4 Hz, 2H), 4.66 (d, *J* = 5.3 Hz, 2H), 1.13 (s, 21H).

Preparation of **30** :

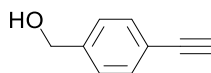

Compound **29** (463.3 mg, 1.609 mmol) was dissolved in DCM (1 ml). TBAF (2 ml of 1.0M solution, 2.413 mmol) was then added and the mixture was stirred for 2 hr at room temperature. To workup, the reaction was diluted with EtOAc and then the organic layer was washed with H<sub>2</sub>O, brine, dried over sodium sulfate, and evaporated under vacuum. Flash column chromatography using a gradient of 20-40% EtOAc in Hex was used to purify the desired compound. Yield: 212 mg, quan. *R*<sub>f</sub>=0.24 (EtOAc/Hex, 1:4). Characterization matched a previous report of this known compound.<sup>20</sup> <sup>1</sup>H NMR (CDCl<sub>3</sub>, 300 MHz) δ 7.47 (d, *J* = 8.1 Hz, 2H), 7.29 (d, *J* = 8.4 Hz, 2H), 4.63 (s, 2H), 3.07 (s, 1H).

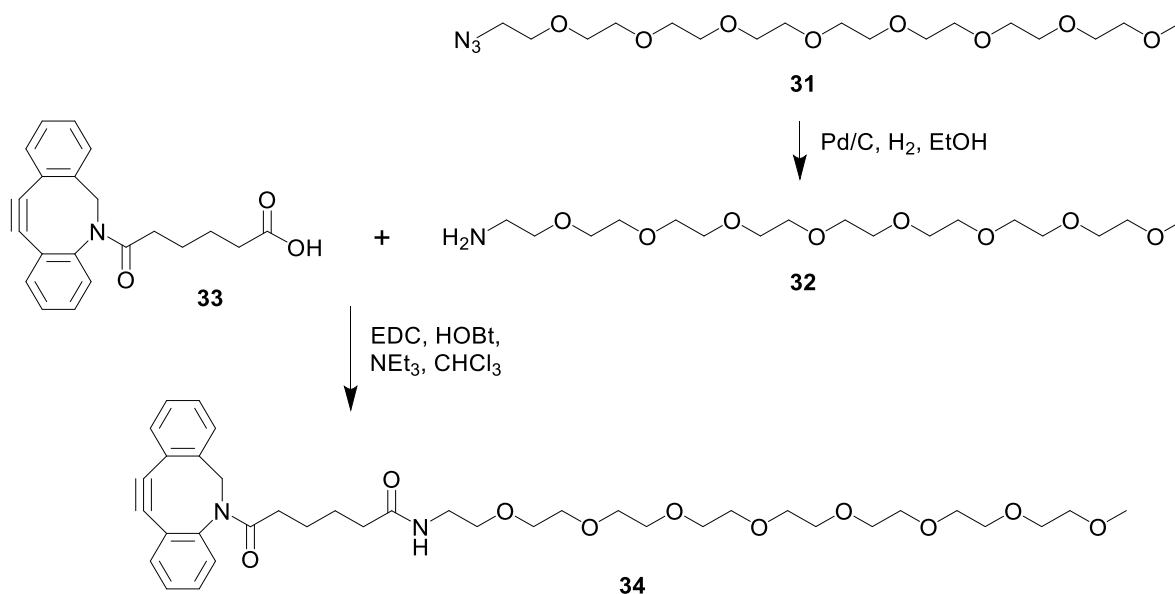

**Scheme S14.** Synthesis of **34**

Preparation of **32** :

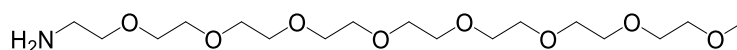

Compound **31** (7.5 mg, 0.0183 mmol), and 10% Pd/C (1 mg, 0.006 mmol) were dissolved in EtOH (5 ml). The reaction mixture was first purged with N<sub>2</sub> gas, followed by H<sub>2</sub> gas. The mixture was then stirred for 16 hr at room temperature under H<sub>2</sub>. To workup, the reaction was diluted with EtOAc and then filtered through celite. The collected organic layer was dried over sodium sulfate, and evaporated under vacuum to give a clear oil. Yield: 7.0 mg, quan. Characterization matched a previous report of this known compound.<sup>21</sup> **HRMS** for C<sub>17</sub>H<sub>37</sub>NO<sub>8</sub> [M+H]<sup>+</sup> calcd. 384.2592, found 284.2603.

Preparation of **34** :

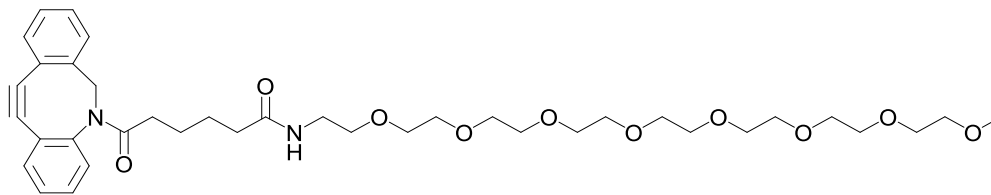

Compound **32** (8.5 mg, 0.022 mmol), compound **33** (7 mg, 0.022 mmol), EDC (7 mg, 0.044 mmol), HOBt (6 mg, 0.022 mmol) were dissolved in CHCl<sub>3</sub> (0.5 ml). NEt<sub>3</sub> (6 μl, 0.044 mmol) was then added and the mixture was stirred for 16 hr at room temperature under N<sub>2</sub>. To workup, the solvent was removed by vacuum and the residue was redissolved in acetonitrile with 1-2 drops of H<sub>2</sub>O. The mixture was then filtered and directly purified by reverse phase HPLC using method 10 (retention time ~27.7 min). Yield: 3.9 mg, 25%. **<sup>1</sup>H NMR** (DMSO-d<sub>6</sub>, 400 MHz) δ 7.72-7.29 (m, 8H), 5.04 (d, *J* = 14.0 Hz, 1H), 3.61 (d, *J* = 14.0 Hz, 1H), 3.58-3.41 (m, 32H), 3.23 (s, 3H), 2.22-2.13 (m, 1H), 1.89-1.81 (m, 2H), 1.79-1.69 (m, 1H), 1.37-1.10 (m, 4H); **<sup>13</sup>C NMR** (DMSO-d<sub>6</sub>, 75 MHz): δ 172.0, 171.8, 152.0, 148.6, 132.5, 129.6, 129.0, 128.2, 128.1, 127.8, 126.9, 125.3, 122.6, 121.5, 114.5, 108.3, 71.3, 69.8 (br s), 69.7, 69.6, 69.1, 58.1, 54.8, 34.9, 33.9, 24.4. **HRMS** for C<sub>38</sub>H<sub>54</sub>N<sub>2</sub>O<sub>10</sub> [M+H]<sup>+</sup> calcd. 699.3851, found 699.3857.

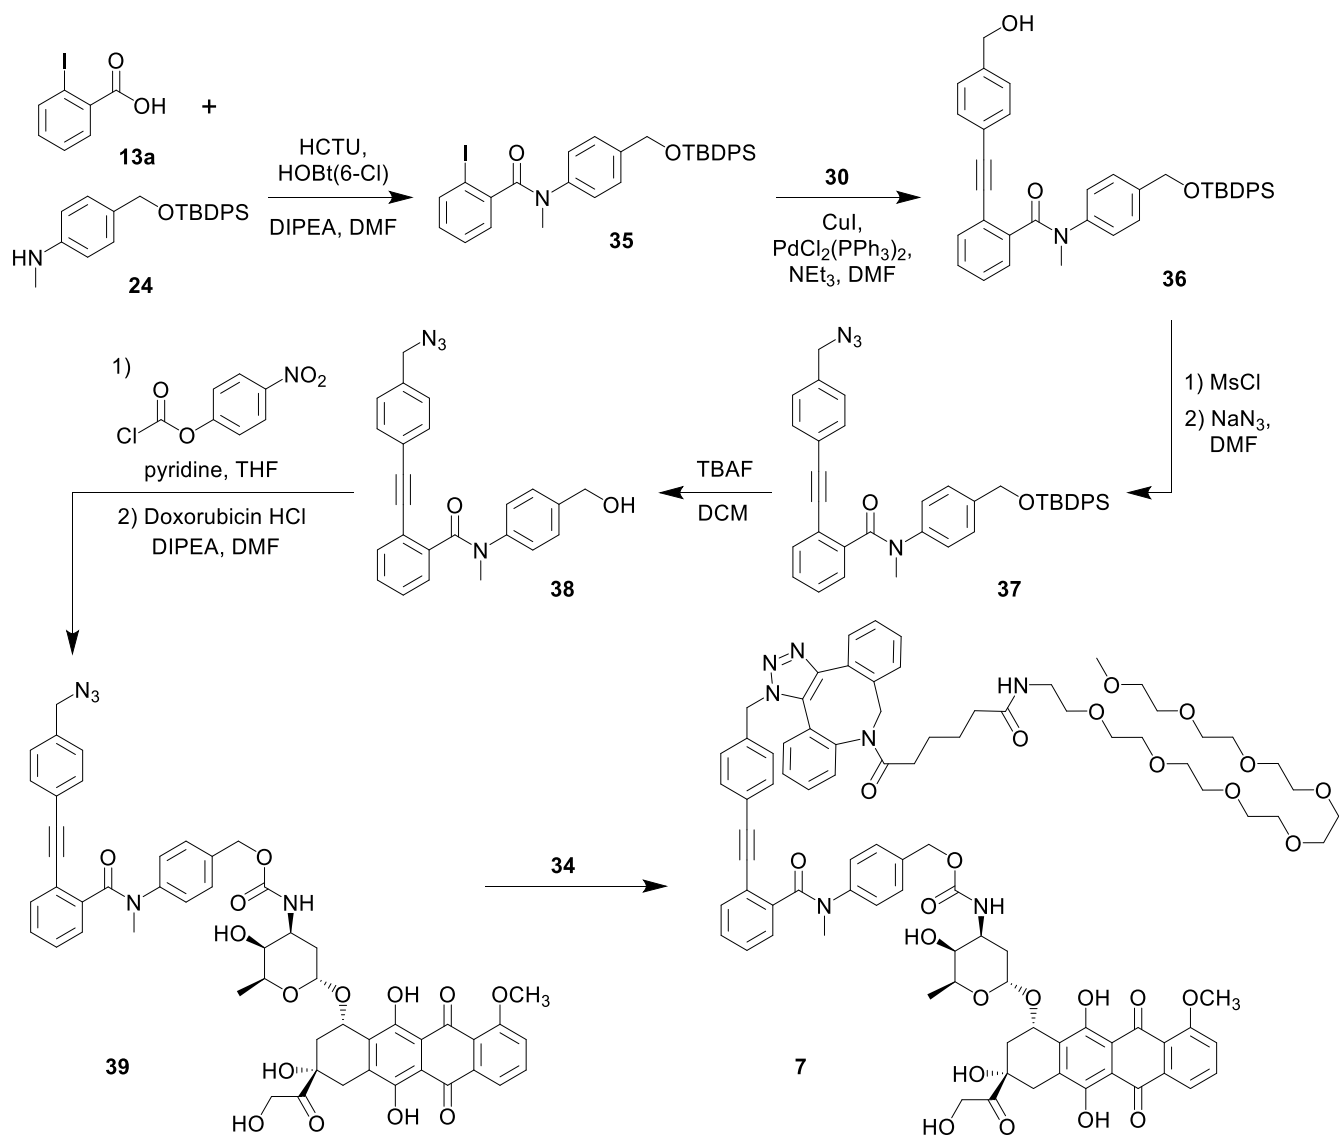

**Scheme S15.** Synthesis of **7**

Preparation of **35** :

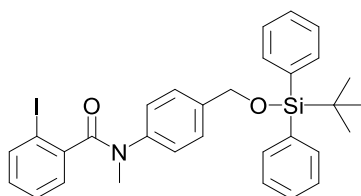

Compound **13a** (306 mg, 1.24 mmol), **24** (309 mg, 0.82 mmol), HCTU (680 mg, 1.65 mmol), HOBT(6-Cl) (279 mg, 1.65 mmol) were dissolved in DMF (5 ml). DIPEA (279  $\mu$ l, 1.65 mmol) was then added and the mixture was stirred for 16 hr at 50°C under N<sub>2</sub>. To workup, the reaction was diluted with EtOAc and then the organic layer was washed with H<sub>2</sub>O, brine, dried over sodium sulfate, and evaporated under vacuum. Flash column chromatography using a gradient of 15-25% EtOAc in Hex was used to purify the desired compound. Yield: 112 mg, 15%. *R<sub>f</sub>*=0.17 (EtOAc/Hex, 1:4). <sup>1</sup>H NMR (CDCl<sub>3</sub>, 400 MHz)  $\delta$  7.73-7.60 (m, 6H), 7.46-7.32 (m, 9H), 7.12-7.02 (m, 2H), 6.89-6.83 (m, 1H), 4.64 (s, 2H), 3.51 (s, 3H), 1.05 (s, 9H); <sup>13</sup>C NMR (CDCl<sub>3</sub>, 75 MHz):  $\delta$  170.5, 142.8, 142.2, 140.3, 139.4, 135.7, 133.5, 130.0, 129.9, 128.8, 127.9, 127.5, 127.0, 126.7, 125.8, 93.8, 65.0, 37.5, 26.9, 19.3. HRMS for C<sub>31</sub>H<sub>32</sub>INO<sub>2</sub>Si [M+H]<sup>+</sup> calcd. 606.1320, found 606.1345.



Preparation of **36** :

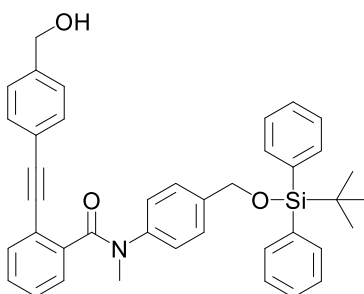

Compound **35** (257 mg, 0.425 mmol), CuI (16 mg, 0.085 mmol), and PdCl<sub>2</sub>(PPh<sub>3</sub>)<sub>2</sub> (30 mg, 0.043 mmol) were dissolved in DMF (2 ml) and NEt<sub>3</sub> (2 ml). The mixture was degassed with N<sub>2</sub> for 5 min. Compound **30** (87 mg, 0.552 mmol) dissolved in DMF (0.5 ml) was then added and the mixture was stirred for 16 hr at 40°C under N<sub>2</sub>. To workup, the reaction was diluted with EtOAc and then the organic layer was washed with H<sub>2</sub>O, brine, dried over sodium sulfate, and evaporated under vacuum. Flash column chromatography using a gradient of 30-50% EtOAc in Hex was used to purify the desired compound. Yield: 135 mg, 52%. *R<sub>f</sub>*=0.40 (EtOAc/Hex, 1:1). <sup>1</sup>H NMR (CDCl<sub>3</sub>, 300 MHz) δ 7.71-7.29 (m, 18H), 7.22-6.98 (m, 4H), 4.71 (s, 2H), 4.63 (s, 2H), 3.52 (s, 3H), 1.05 (s, 9H); <sup>13</sup>C NMR (CDCl<sub>3</sub>, 75 MHz): δ 170.3, 141.7, 139.9, 135.8, 133.6, 132.4, 132.3, 132.1, 130.0, 128.8, 128.7, 127.9, 127.1, 126.9 (br s), 126.5 (br s), 92.2, 88.6, 65.1, 65.0, 54.4, 26.9, 19.3. HRMS for C<sub>40</sub>H<sub>39</sub>NO<sub>3</sub>Si [M+H]<sup>+</sup> calcd. 610.2772, found 610.2785.

Preparation of **37** :

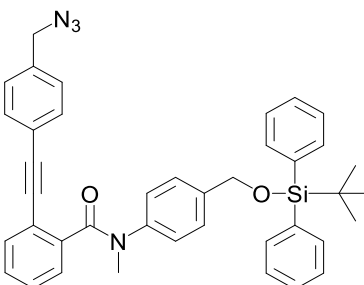

Compound **36** (135 mg, 0.221 mmol) was dissolved in THF (5 ml) and cooled to 0°C on an ice bath. Mesyl chloride (22 μl, 0.287 mmol) and triethylamine (40 μl, 0.287 mmol) was then added and the mixture was stirred for 1 hr at 0°C under N<sub>2</sub>. To workup, the reaction was quenched with cold Na<sub>2</sub>CO<sub>3</sub> and then the product was extracted with DCM. The combined organic layers were dried over sodium sulfate, and evaporated under vacuum to give the intermediate compound as an oil.

In the next step, the intermediate compound was dissolved in DMF (5 ml). Sodium azide (29 mg, 0.442 mmol) was then added and the mixture was stirred for 16 hr at room temperature under N<sub>2</sub>. To workup, the reaction was diluted with EtOAc and then the organic layer was washed with H<sub>2</sub>O, brine, dried over sodium sulfate, and evaporated under vacuum. Flash column chromatography using a gradient of 10-25% EtOAc in Hex was used to purify the desired compound. Yield: 140 mg, 99%. *R<sub>f</sub>*=0.71 (EtOAc/Hex, 1:1). <sup>1</sup>H NMR (CDCl<sub>3</sub>, 300 MHz) δ 7.51-7.75 (m, 7H), 7.28-7.44 (m, 11H), 7.02-7.20 (m, 4H), 4.64 (s, 2H), 4.38 (s, 2H), 3.53 (s, 3H), 1.05 (s, 9H); <sup>13</sup>C NMR (CDCl<sub>3</sub>, 75 MHz): δ 171.2, 139.9, 136.0, 135.0, 133.6, 132.3, 132.2, 130.0, 128.6, 128.4, 127.9, 126.9 (br s), 126.6 (br s), 92.7, 88.8, 65.1, 60.5, 54.6, 26.9, 19.3. HRMS for C<sub>40</sub>H<sub>38</sub>N<sub>4</sub>O<sub>2</sub>Si [M+H]<sup>+</sup> calcd. 635.2837, found 635.2840.

Preparation of **38** :

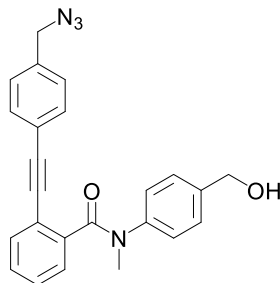

Compound **37** (57.3 mg, 0.090 mmol) was dissolved in DCM (1 ml). TBAF (135  $\mu$ l of 1.0M solution, 0.135 mmol) was then added and the mixture was stirred for 2 hr at 40°C. To workup, the reaction was diluted with EtOAc and then the organic layer was washed with H<sub>2</sub>O, brine, dried over sodium sulfate, and evaporated under vacuum. Flash column chromatography using a gradient of 25-50% EtOAc in Hex was used to purify the desired compound. Yield: 29.9 mg, 84%.  $R_f$ =0.23 (EtOAc/Hex, 1:1). <sup>1</sup>H NMR (CDCl<sub>3</sub>, 300 MHz)  $\delta$  7.69-7.47 (m, 1H), 7.56 (d,  $J$  = 7.9 Hz, 2H), 7.45-7.28 (m, 1H), 7.33 (d,  $J$  = 8.0 Hz, 2H), 7.24-7.00 (m, 6H), 4.57 (s, 2H), 4.38 (s, 2H), 3.51 (s, 3H); <sup>13</sup>C NMR (CDCl<sub>3</sub>, 75 MHz):  $\delta$  170.2, 139.7, 136.1, 132.4, 132.3, 132.2, 128.5, 128.8, 128.7, 128.5, 128.2, 127.4 (br s), 127.1 (br s), 92.7, 88.2, 64.6, 60.5, 54.6. HRMS for C<sub>24</sub>H<sub>20</sub>N<sub>4</sub>O<sub>2</sub> [M+H]<sup>+</sup> calcd. 397.1659, found 397.1663.

Preparation of **39** :

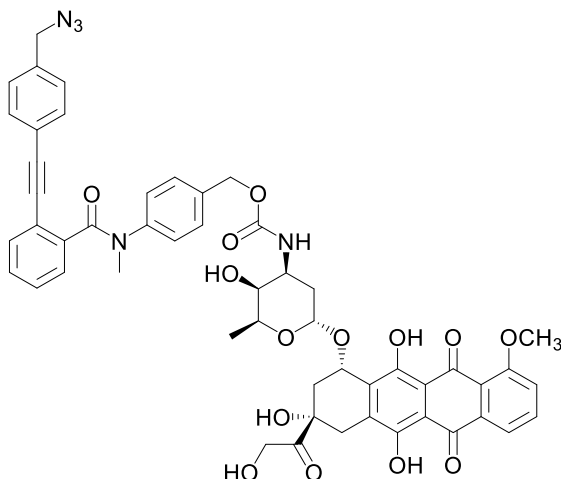

4-Nitrophenyl chloroformate (9.0 mg, 0.046 mmol) was dissolved in THF (300  $\mu$ l) and cooled to 0°C on an ice bath. Pyridine (4  $\mu$ l, 0.046 mmol) was added and after stirring for 20 min, compound **38** (12.1 mg, 0.031 mmol) dissolved in THF (200  $\mu$ l) was added and the mixture was stirred for 16 hr at room temperature. To workup, THF was removed and the residue was redissolved in EtOAc. The organic layer was then washed with H<sub>2</sub>O, brine, dried over sodium sulfate, and evaporated under vacuum. Flash column chromatography using a gradient of 25-50% EtOAc in Hex was used to purify the desired intermediate. Yield: 11.7 mg, 68%.  $R_f$ =0.36 (EtOAc/Hex, 1:1). HRMS for C<sub>31</sub>H<sub>23</sub>N<sub>5</sub>O<sub>6</sub> [M+H]<sup>+</sup> calcd. 562.1721, found 562.1728.

The intermediate compound and doxorubicin hydrochloride (24.0 mg, 0.042 mmol) were dissolved in DMF (300  $\mu$ l). DIPEA (7  $\mu$ l, 0.042 mmol) was then added and the mixture was stirred for 16 hr at room temperature. To workup, additional DMF (1 ml) was added. The reaction was then filtered and directly purified by reverse phase HPLC using method 11 (retention time ~20.4 min). Yield: 10.4 mg, 51%. <sup>1</sup>H NMR (DMF-d<sub>7</sub>, 400 MHz)  $\delta$  8.00-7.92 (m, 2H), 7.73 (dd,  $J$  = 7.7, 1.9 Hz, 1H), 7.68-7.49 (m, 4H), 7.47-7.14 (m, 7H), 6.78 (d,  $J$  = 8.1 Hz, 1H), 5.57 (s, 1H), 5.40-5.36 (m, 1H), 5.15-5.09 (m, 1H), 5.02-4.82 (m, 3H), 4.80-4.71 (m, 3H), 4.59 (s, 2H), 4.09 (s, 3H), 3.49 (s, 3H), 3.10 (q,  $J$  = 18.5 Hz, 2H), 2.45-2.37 (m, 1H), 2.26 (dd,  $J$  = 14.5, 5.3 Hz, 1H), 2.03 (td,  $J$  = 13.0, 3.8 Hz, 1H), 1.70-1.61 (m, 1H), 1.23 (d,  $J$  = 6.5 Hz, 3H); <sup>13</sup>C NMR (THF-d<sub>8</sub>, 75 MHz):  $\delta$  214.7, 187.8, 187.5, 169.2, 162.3, 157.3, 156.4, 156.0, 144.3, 141.8, 137.4, 136.6, 136.3, 135.8, 134.7, 132.6, 132.4, 129.0, 128.9, 128.8, 128.6, 128.4, 127.6, 127.5, 127.4, 119.8, 119.7, 112.1, 102.1, 92.9, 76.8, 70.7, 69.7, 65.7, 65.5, 56.6, 54.7, 48.0, 36.8, 33.9, 30.8, 17.0. HRMS for C<sub>52</sub>H<sub>47</sub>N<sub>5</sub>O<sub>14</sub> [M+Na]<sup>+</sup> calcd. 988.3012, found 988.3022.

Preparation of **7** :

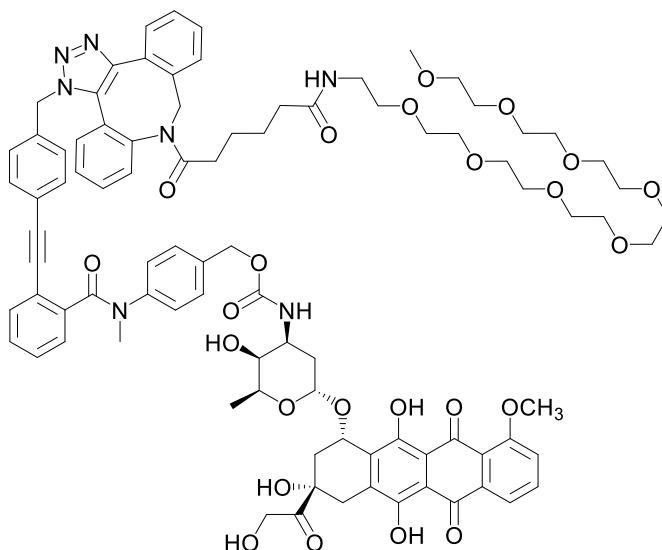

Compound **39** (5.3 mg, 0.0055 mmol) and **34** (3.9 mg, 0.0055 mmol) were dissolved in a mixture of 1:1:1 PBS/MeOH/ACN (1.2 ml). The mixture was stirred for 16 hr at room temperature. To workup, additional MeOH (1 ml) was added. The reaction was then filtered and directly purified by reverse phase HPLC using method 12 (retention time 17.7 min). Yield: 4.7 mg, 51%. <sup>1</sup>H NMR (1,4-Dioxane-d<sub>8</sub>, 400 MHz) δ 8.04 (d, *J* = 7.7 Hz, 1H), 7.82 (t, *J* = 8.0 Hz, 1H), 7.61-7.43 (m, 7H), 7.40-7.21 (m, 9H), 7.20-7.03 (m, 6H), 6.93 (s, 1H), 6.84 (s, 1H), 6.22-5.98 (m, 1H), 5.90-5.66 (m, 1H), 5.41-5.35 (m, 1H), 5.25-5.19 (m, 1H), 4.97-4.80 (m, 2H), 4.78-4.75 (m, 1H), 4.72 (t, *J* = 5.8 Hz, 1H), 4.30-4.22 (m, 1H), 4.03 (s, 3H), 3.85-3.73 (m, 4H), 3.56-3.40 (m, 35H), 3.30 (s, 3H), 3.21-3.06 (m, 2H), 2.46-2.35 (m, 1H), 2.20-2.08 (m, 1H), 2.03-1.87 (m, 2H), 1.84-1.73 (m, 1H), 1.72-1.52 (m, 2H), 1.43-1.27 (m, 4H), 1.23 (d, *J* = 6.5 Hz, 3H); <sup>13</sup>C NMR (1,4-Dioxane-d<sub>8</sub>, 75 MHz): δ 214.9, 187.8, 187.7, 172.8, 172.4, 162.1, 157.1, 156.3, 156.0, 141.9, 140.1, 139.3, 137.8, 137.6, 137.2, 136.5, 136.2, 136.0, 135.9, 135.6, 135.5, 135.4, 135.1, 134.8, 133.3, 132.9, 132.8, 132.1, 131.2, 130.5, 130.3, 130.0, 129.8, 129.4, 129.1, 129.0, 128.9, 128.8, 128.0, 127.5, 125.5, 122.0, 120.8, 119.9, 119.3, 112.2, 112.1, 110.0, 101.8, 76.7, 72.5, 71.1, 70.7, 58.7, 56.6, 47.9, 41.0, 39.6, 36.1, 33.9, 30.8, 25.4, 24.8, 16.9. HRMS for C<sub>90</sub>H<sub>101</sub>N<sub>7</sub>O<sub>24</sub> [M+Na]<sup>+</sup> calcd. 1686.6796, found 1686.6798.

### 1.5.4 Gold Catalyst Complexes

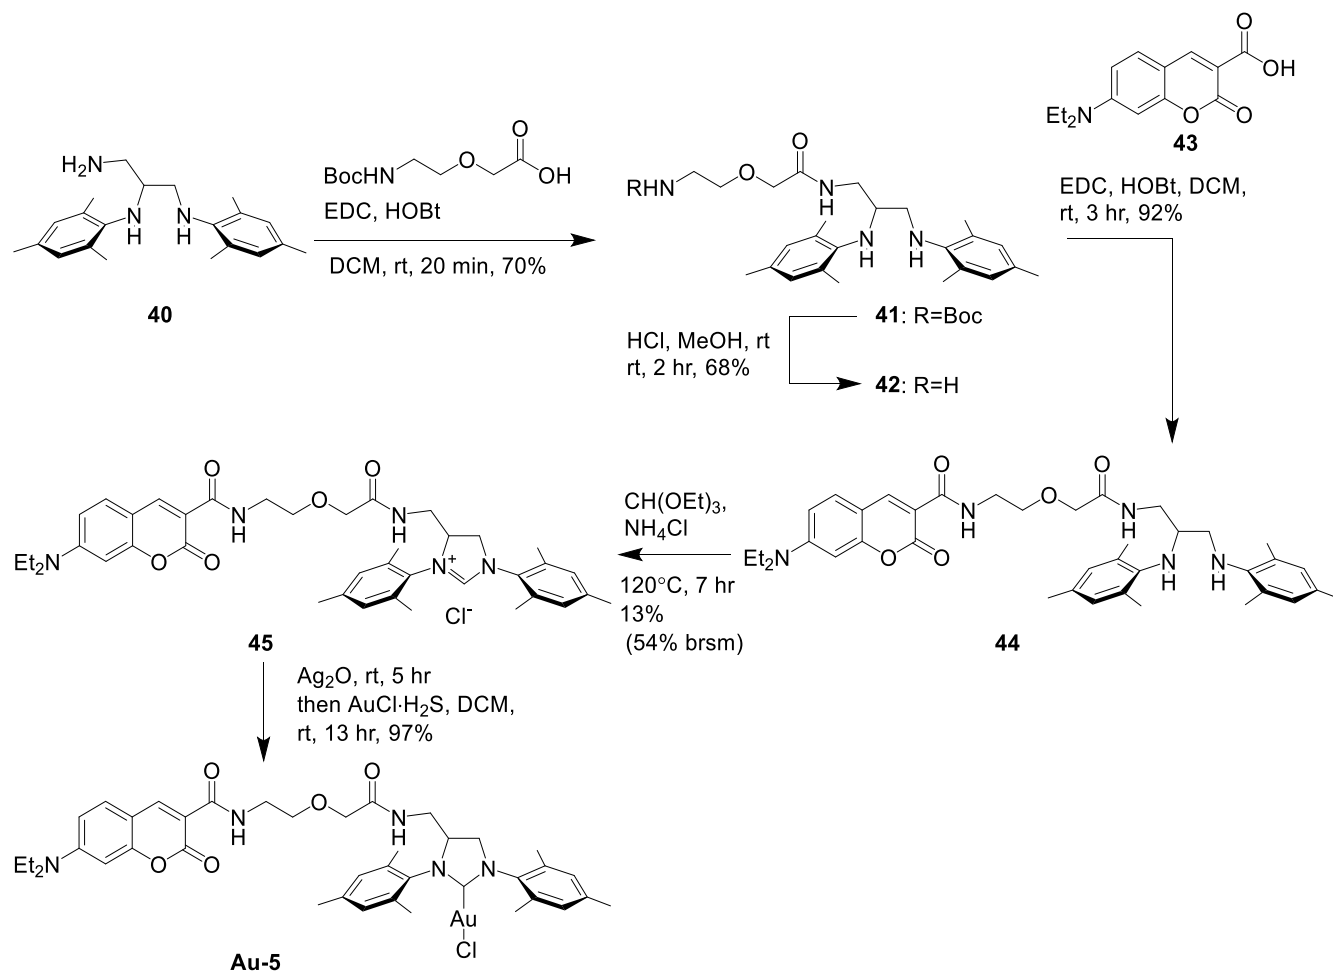

**Scheme S16.** Synthesis of **Au-5**

Preparation of **41** :

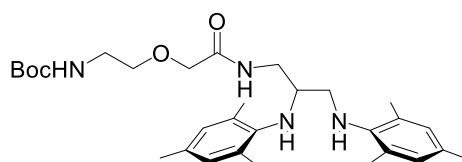

Compound **40** was prepared according to the previous literature.<sup>22</sup> Compound **40** (275.0 mg, 844.9  $\mu$ mol) and Boc-amino-3-oxapentanoic acid (277.8 mg, 1.270 mmol) were dissolved in DCM. EDC (1.270 mmol) and HOBT (1.270 mmol) were added and the mixture was stirred at rt for 20 min. To workup, H<sub>2</sub>O was added to the mixture and the product was extracted to CH<sub>2</sub>Cl<sub>2</sub>. The organic layer was dried over Na<sub>2</sub>SO<sub>4</sub> and then evaporated under vacuum after the filtration. Flash column chromatography using a gradient of 25-50% of EtOAc in Hex was used to purify the desired compound. Yield: 311.5 mg, 70%.  $R_f=0.74$  (CHCl<sub>3</sub>/MeOH, 9:1). <sup>1</sup>H NMR (CDCl<sub>3</sub>, 400 MHz)  $\delta$  7.08 (m, 1H), 6.81 (s, 2H), 6.79 (s, 2H), 3.94 (s, 2H), 3.72-3.60 (m, 2H), 3.60-3.50 (m, 2H), 3.46-3.21 (m, 4H), 3.09 (dd,  $J=12.4, 6.0$  Hz, 1H), 2.90 (dd,  $J=12.4, 5.2$  Hz, 1H), 2.25 (s, 6H), 2.22 (s, 3H), 2.20 (s, 3H), 2.19 (s, 6H), 1.43 (s, 9H). <sup>13</sup>C NMR (CDCl<sub>3</sub>, 100 MHz):  $\delta$  170.0, 156.0, 143.3, 141.3, 131.7, 131.4, 130.2, 130.0, 129.1, 79.8, 71.0, 70.5, 56.9, 51.2, 42.1, 40.5, 28.5, 20.6, 19.1, 18.5. HRMS for C<sub>30</sub>H<sub>46</sub>N<sub>4</sub>O<sub>4</sub> [M+H]<sup>+</sup> calcd. 527.3592, found 527.3597.

Preparation of **42** :

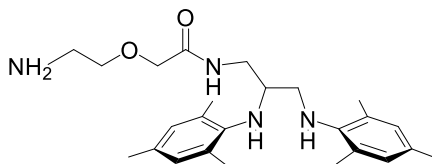

Compound **41** (314.9 mg, 591.4  $\mu\text{mol}$ ) was dissolved in 4.6 M HCl solution in MeOH (8.3 mL). The reaction solution was stirred at rt for 2 h. To workup, the reaction solution was neutralized with 1.5 g of NaOH and sat. aq.  $\text{NaHCO}_3$ . The product was extracted to  $\text{CH}_2\text{Cl}_2$ . The organic layer was dried over  $\text{Na}_2\text{SO}_4$ , filtered, and then evaporated to obtain the desired compound. Yield: 172.5 mg, 68%.  $R_f=0.23$  ( $\text{CHCl}_3/\text{MeOH}$ , 4:1).  $^1\text{H NMR}$  ( $\text{CDCl}_3$ , 400 MHz)  $\delta$  7.52 (m, 1H), 6.81 (s, 2H), 6.78 (s, 2H), 3.98 (s, 2H), 3.65-3.47 (m, 4H), 3.42 (dt,  $J=13.6$ , 5.6 Hz, 1H), 3.07 (dd,  $J=12.4$ , 6.0 Hz, 1H), 2.88 (dd,  $J=12.4$ , 5.2 Hz, 1H), 2.83 (dd,  $J=5.6$ , 4.4 Hz, 2H), 2.24 (s, 6H), 2.21 (s, 3H), 2.19 (s, 3H), 2.17 (s, 6H).  $^{13}\text{C NMR}$  ( $\text{CDCl}_3$ , 100 MHz):  $\delta$  170.6, 143.5, 141.3, 131.5, 131.3, 130.0, 129.6, 129.0, 74.0, 70.5, 57.0, 51.0, 41.7, 41.5, 20.6, 19.2, 18.5. **HRMS** for  $\text{C}_{25}\text{H}_{38}\text{N}_4\text{O}_2$   $[\text{M}+\text{H}]^+$  calcd.427.3068, found. 427.3071.

Preparation of **44** :

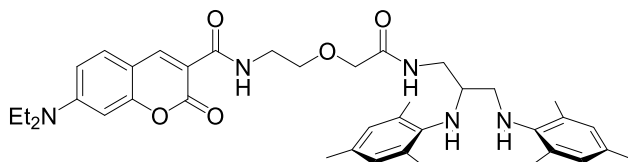

Compound **42** (160.7 mg, 376.7  $\mu\text{mol}$ ) and **43** (108.3 mg, 414.4  $\mu\text{mol}$ ) were dissolved in DCM (15 mL). EDC (79.4 mg, 414.4  $\mu\text{mol}$ ) and HOBt (55.6 mg, 414.4  $\mu\text{mol}$ ) were added and the mixture was stirred at rt for 2 h. Then, EDC (79.4 mg, 414.4  $\mu\text{mol}$ ) and HOBt (55.6 mg, 414.4  $\mu\text{mol}$ ) were added and the mixture was stirred further for 1 hr. To workup,  $\text{H}_2\text{O}$  was added to the mixture and the product was extracted to  $\text{CH}_2\text{Cl}_2$ . The organic layer was dried over  $\text{Na}_2\text{SO}_4$  and then evaporated under vacuum after the filtration. Flash column chromatography using a gradient of 0-5% of MeOH in  $\text{CHCl}_3$  was used to purify the desired compound. Yield: 231.2 mg, 92%.  $R_f=0.53$  ( $\text{CHCl}_3/\text{MeOH}$ , 9:1).  $^1\text{H NMR}$  ( $\text{CDCl}_3$ , 400 MHz)  $\delta$  9.07 (m, 1H), 8.60 (s, 1H), 7.31 (d,  $J=9.2$  Hz, 1H), 6.724 (s, 2H), 6.716 (s, 2H), 6.61 (dd,  $J=9.2$ , 2.4 Hz, 1H), 6.43 (d,  $J=2.4$  Hz, 1H), 4.02 (s, 2H), 3.69-3.49 (m, 7H), 3.45 (q,  $J=7.2$  Hz, 4H), 3.05 (dd,  $J=12.8$ , 5.6 Hz, 1H), 2.86 (dd,  $J=12.8$ , 4.4 Hz, 1H), 2.21 (s, 6H), 2.16 (s, 6H), 2.15 (s, 6H), 1.25 (t,  $J=7.2$  Hz, 6H).  $^{13}\text{C NMR}$  ( $\text{CDCl}_3$ , 100 MHz)  $\delta$  170.3, 163.5, 163.0, 157.7, 148.3, 143.7, 141.5, 133.5, 131.3, 131.2, 130.9, 130.0, 129.8, 129.5, 129.2, 110.1, 110.0, 108.5, 96.6, 70.6, 70.6, 57.0, 50.7, 45.2, 41.7, 39.3, 20.6, 19.1, 18.5, 12.6. **HRMS** for  $\text{C}_{39}\text{H}_{52}\text{N}_5\text{O}_5$   $[\text{M}+\text{H}]^+$  calcd.670.3963, found. 670.3977.

Preparation of **45** :

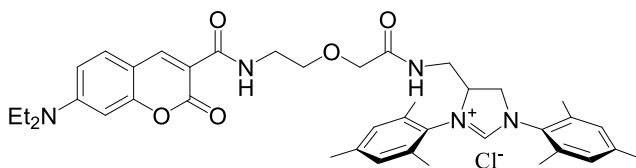

Compound **44** (165.6 mg, 247.2  $\mu\text{mol}$ ) was dissolved in  $\text{CH}(\text{OEt})_3$  (3.0 mL).  $\text{NH}_4\text{Cl}$  (13.2 mg, 247.2  $\mu\text{mol}$ ) was added and the mixture was stirred at 120  $^\circ\text{C}$  for 7 hrs. After cooled to rt, the mixture was filtered and the filtrate was concentrated under vacuum. The product was sedimentated in  $\text{Et}_2\text{O}$ , filtered with Celite, and recovered with  $\text{CHCl}_3$ . The resulting solution was evaporated under vacuum. Flash column chromatography using a gradient of 5-15% of MeOH in  $\text{CHCl}_3$  was used to purify the desired compound. From the extract in  $\text{Et}_2\text{O}$ , the 76% yield of the starting material **44** was purified with flash column chromatography using a gradient of 0-7.5% of MeOH in  $\text{CHCl}_3$ . Yield: 23.6 mg, 13% (54% brsm),  $R_f = 0.56$  ( $\text{CHCl}_3/\text{MeOH}$ , 8:2).  $^1\text{H NMR}$  ( $\text{CDCl}_3$ , 400 MHz) 9.55 (s, 1H), 8.99 (m, 1H), 8.63 (s, 1H), 8.01 (t,  $J=6.0$  Hz, 1H), 7.42 (d,  $J=9.2$  Hz, 1H), 6.96 (s, 2H), 6.92 (s, 2H), 6.67 (dd,  $J=8.8, 2.4$  Hz, 1H), 6.44 (d,  $J=2.4$  Hz, 1H), 5.32 (m, 1H), 4.58 (t,  $J=12.0$  Hz, 1H), 4.48 (dd,  $J=12.0, 8.0$  Hz, 1H), 4.03-3.86 (m, 3H), 3.76-3.59 (m, 5H), 3.53-3.42 (m, 5H), 2.47 (s+brs, 3H+3H), 2.44 (s, 3H), 2.36 (brs, 3H), 2.27 (s, 3H), 2.25 (s, 3H), 1.27 (t,  $J=7.2$  Hz, 6H).  $^{13}\text{C NMR}$  ( $\text{CDCl}_3$ , 100 MHz) 171.0, 163.4, 163.1, 160.4, 157.8, 152.9, 148.4, 140.8, 140.6, 135.2, 131.4, 130.7, 130.5, 130.2, 129.0, 124.5, 121.9, 110.3, 110.0, 108.5, 96.5, 70.7, 70.4, 62.5, 55.6, 45.3, 40.1, 39.3, 29.9, 21.2, 19.0, 18.7, 12.6. **HRMS** for  $\text{C}_{40}\text{H}_{50}\text{N}_5\text{O}_5\text{Cl}$  [ $\text{M}-\text{Cl}$ ] $^+$  calcd. 680.3806, found. 680.3846.

Preparation of **Au-5** :

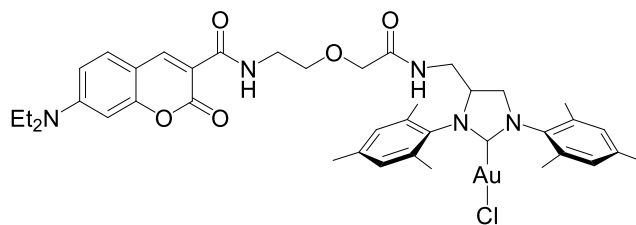

Compound **45** (23.6 mg, 32.7  $\mu\text{mol}$ ) was dissolved in DCM (3.0 mL).  $\text{Ag}_2\text{O}$  (3.8 mg, 16.4  $\mu\text{mol}$ ) was added and the mixture was stirred at rt for 4 hrs. The mixture was filtered with Celite to remove the precipitated salt. To the filtrate was added chloro(dimethylsulfide)gold (I) (8.7 mg, 32.7  $\mu\text{mol}$ ) and stirred at rt for 13 hrs. The mixture was filtered with Celite and the filtrate was evaporated under vacuum to obtain **Au-5** as a brown powder. Yield: 28.9 mg, 97%.  $^1\text{H NMR}$  ( $\text{CDCl}_3$ , 400 MHz) 9.03 (m, 1H), 8.64 (s, 1H), 7.40 (d,  $J=9.6$  Hz, 1H), 7.04 (dd,  $J=7.2, 4.8$  Hz, 1H), 6.93 (s, 1H), 6.90 (s, 3H), 6.69 (dd,  $J=8.8, 2.4$  Hz, 1H), 6.47 (d,  $J=2.4$  Hz, 1H), 4.67 (m, 1H), 4.13 (t,  $J=9.6$  Hz, 1H), 3.98-3.84 (m, 4H), 3.67-3.47 (m, 8H), 3.33 (dt,  $J=13.2, 4.8$  Hz, 1H), 2.41 (s, 3H), 2.38 (s, 3H), 2.33 (s, 3H), 2.29 (s, 3H), 2.27 (s, 6H), 1.29 (t,  $J=7.2$  Hz, 1H).  $^{13}\text{C NMR}$  ( $\text{CDCl}_3$ , 100 MHz) 195.7, 170.3, 163.4, 163.2, 157.8, 153.0, 148.4, 139.0, 138.9, 136.5, 135.9, 135.4, 135.3, 134.6, 133.6, 131.4, 130.3, 130.2, 129.9, 129.8, 110.4, 109.9, 108.4, 99.4, 70.5, 70.4, 62.6, 55.2, 45.3, 41.3, 39.1, 29.8, 21.2, 19.3, 18.2, 18.1, 18.0, 12.6. **HRMS** for  $\text{C}_{40}\text{H}_{50}\text{N}_5\text{O}_5\text{AuCl}$  [ $\text{M}-\text{Cl}$ ] $^+$  calcd. 877.3394, found. 876.3455.

### 1.5.5 Reaction by-products

Preparation of **46** :

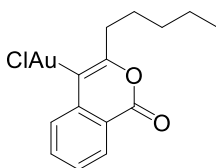

Compound **1q** (50 mg, 0.133 mmol) and **Au-1** (42 mg, 0.106 mmol) were dissolved in THF (2 ml) and PBS buffer pH 7.4 (2 ml). The mixture was stirred for 16 hr at 37 °C. To workup, the reaction was diluted with diethyl ether and then the organic layer was extracted, dried over magnesium sulfate, and evaporated under vacuum. Flash column chromatography using a gradient of 10-25% EtOAc in Hex was used to purify the desired compound. Yield: 19 mg, 40% based on Au.  $R_f=0.30$  (EtOAc/Hex, 1:4).  $^1\text{H NMR}$  ( $\text{CDCl}_3$ , 300 MHz)  $\delta$  7.22-6.99 (m, 4H), 1.81 (t,  $J=7.4$ , 2H), 1.41-1.17 (m, 6H), 0.87 (t,  $J=6.8$ , 3H);  $^{13}\text{C NMR}$  ( $\text{CDCl}_3$ , 75 MHz):  $\delta$  157.0, 156.1, 135.9, 131.2, 128.6, 128.4, 127.6, 120.0, 97.5, 33.0, 31.3, 25.9, 22.4, 14.0. **LRMS** for  $\text{C}_{14}\text{H}_{15}\text{O}_2\text{AuCl}$   $[\text{M}-\text{Cl}]^+$  calcd. 412.2, found. 412.2.

## 2. Cell-based Assays

### 2.1 General Cell Culture Protocol

In this study, the following cell lines were obtained from the RIKEN Cell Bank. Cells were grown in 37 °C incubators supplemented with 5% CO<sub>2</sub> gas. Specific growth media used are indicated as follows:

| Name    | Type                              | Medium                                               | FBS                        | Penicillin-Streptomycin |
|---------|-----------------------------------|------------------------------------------------------|----------------------------|-------------------------|
| HeLa S3 | human cervix adenocarcinoma cells | DMEM (High Glucose)<br>w/ L-glutamine and phenol red | 10%                        | 1%                      |
| PC3     | human prostate cancer cells       | DMEM (High Glucose)<br>w/ L-glutamine and phenol red | 10%                        | 1%                      |
| A549    | human lung adenocarcinoma cells   | DMEM (High Glucose)<br>w/ L-glutamine and phenol red | 10%                        | 1%                      |
| MCF7    | human breast cancer cells         | RPMI<br>w/ L-glutamine                               | 10%<br>(charcoal stripped) | 1%                      |

### 2.2 Cell Viability Studies

#### 2.2.1 MTS Assay Protocol

Cell viability was determined using an MTS assay, which is a colorimetric method to monitor the reduction of MTS tetrazolium salts to formazan via mitochondrial dehydrogenase of metabolically active cells. The commercial kit used in this study was the CellTiter 96® AQueous One Solution Cell Proliferation Assay (Promega, Wisconsin, USA).

Based on cell titration experiments (data not shown), cells were plated and grown overnight on 96-well Falcon® microplates (1000 cells/well for HeLa; 1000 cells/well for PC3; 1000 cells/well for A549; 2000 cells/well for MCF7). The media was then removed, followed by the incubation of various concentrations of compounds used in this study. Generally, 10 µl of compounds were added to 90 µl of media. Following an incubation time of 4 days, cell viability was detected by first removing the media and replacing it with 20 µl MTS reagent and 80 µl media. Following incubation at 37 °C for 2 hr, end-point absorbance was acquired at 490 nm, via a SpectraMax® iD3 Multi-Mode Microplate Reader (Molecular Devices, California, USA). The background control for this assay was the incubation of 20 µl MTS reagent and 80 µl media in the absence of cells. Obtained EC<sub>50</sub> values were calculated via GraphPad Prism (version 7.0d) software using fitting based on the sigmoidal dose response equation.

#### 2.2.2 Controls

Before cell toxicity studies, various controls experiments were performed. The first was to determine the toxicity of DMSO (Figure S14), which was used to dissolve the compounds used in this study. This experiment led to the standardization of 1% DMSO. The next control was to determine the toxicity of **Au-5** (Figure S15). From the acquired growth curves, it was decided that the addition of **Au-5** to a final concentration of 10 µM would be ideal for the tested cell lines (HeLa S3, PC3, A549, and MCF7).



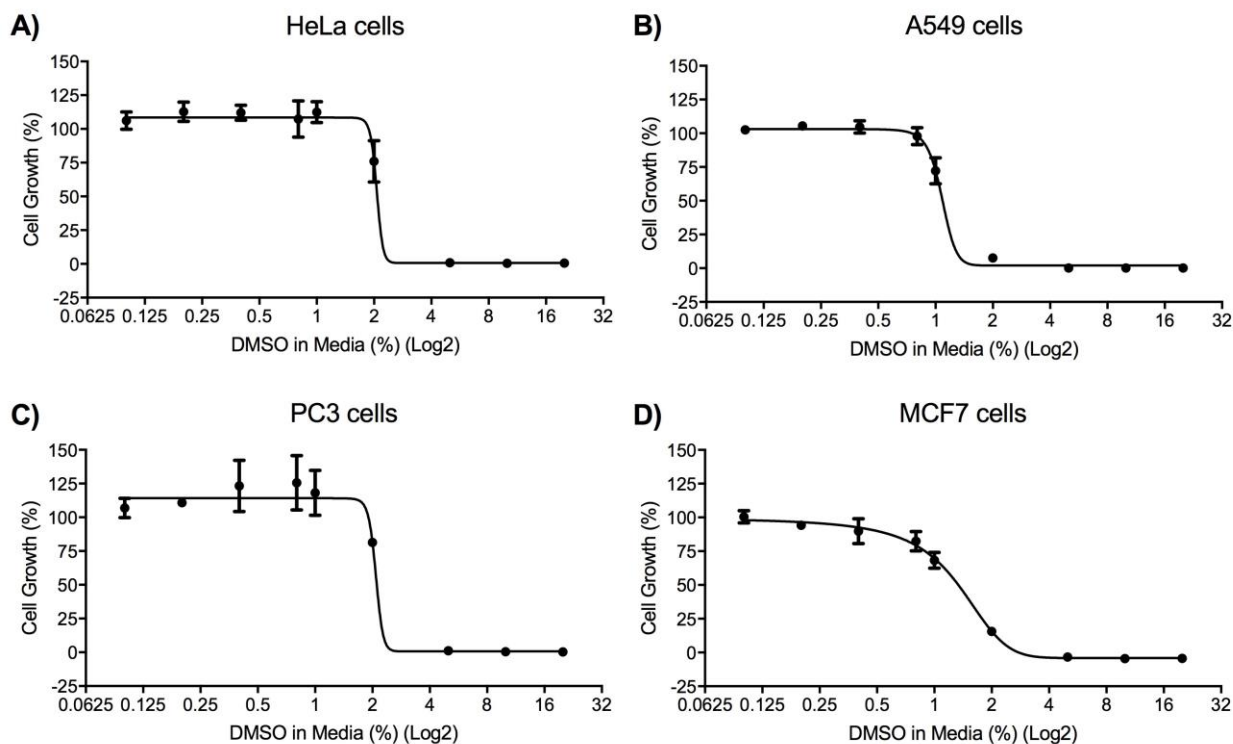

**Figure S14.** Cell growth curves aimed at exploring the effects of DMSO supplementation to cultures of A) HeLa cells, B) A549 cells, C) PC3 cells, and D) MCF7 cells.

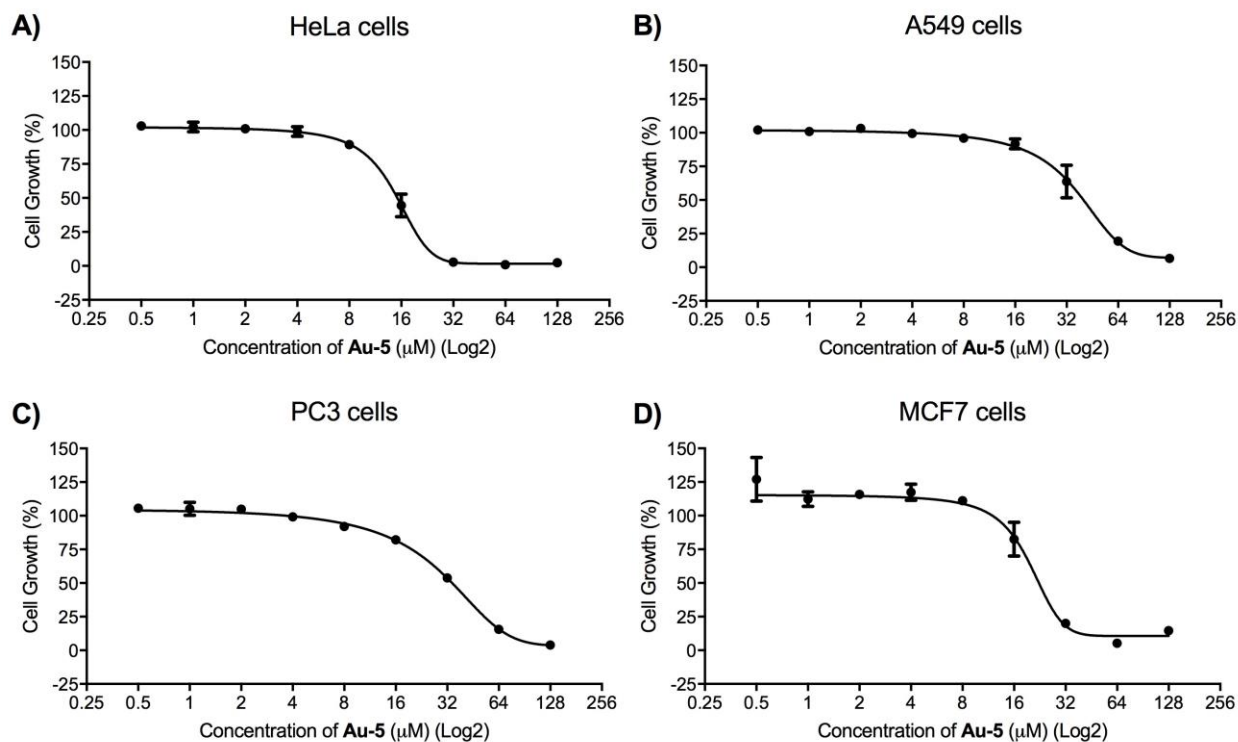

**Figure S15.** Cell growth curves aimed at exploring the effects of Au-5 supplementation to cultures of A) HeLa cells, B) A549 cells, C) PC3 cells, and D) MCF7 cells.

### 2.2.3 Cell Toxicity Results

Cell growth curves to monitor toxicity of the tested compounds (**3a**, **3m**, **6a**, **6m**, and **7**) are shown in Figures S16-S19. A summary of the calculated EC<sub>50</sub> values obtained in tests against MCF7 cells using prodrugs **3a,m** are shown in Table S5.

**Table S5.** Summary of cytotoxic activity of endoxifen-based prodrugs

| Compound       | EC <sub>50</sub> (μM) |
|----------------|-----------------------|
|                | MCF7                  |
| <b>3a</b>      | 55                    |
| <b>3a/Au-5</b> | 26                    |
| <b>3m</b>      | 57                    |
| <b>3m/Au-5</b> | 41                    |
| Endoxifen      | 25                    |

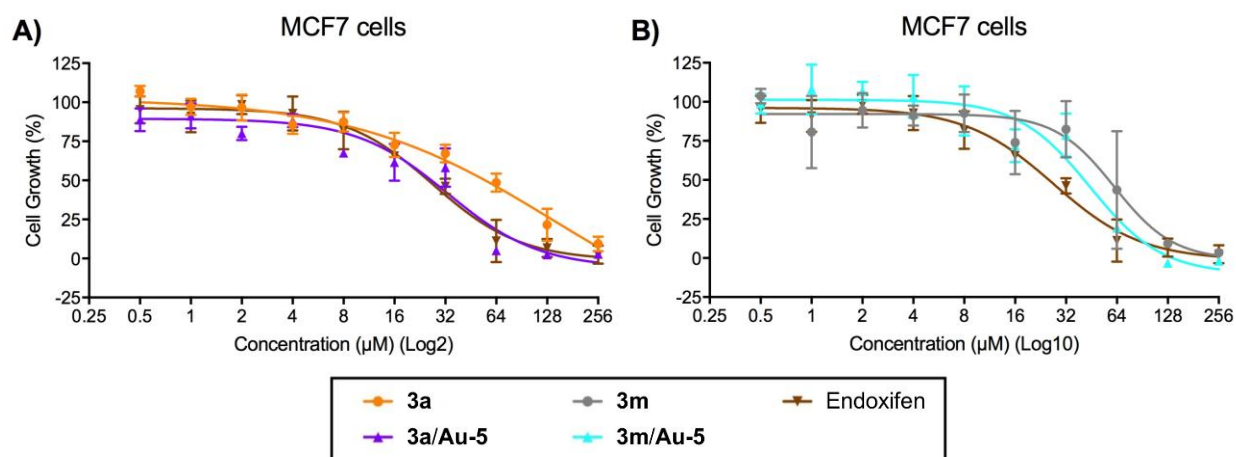

**Figure S16.** Cell growth curves of MCF7 cancer cells aimed at exploring the effects of supplementation with A) prodrug **3a** (orange) and mixture **3a/Au-5** (purple), as well as B) prodrug **3m** (grey) and mixture **3m/Au-5** (turquoise). Endoxifen (brown) was used as a control.

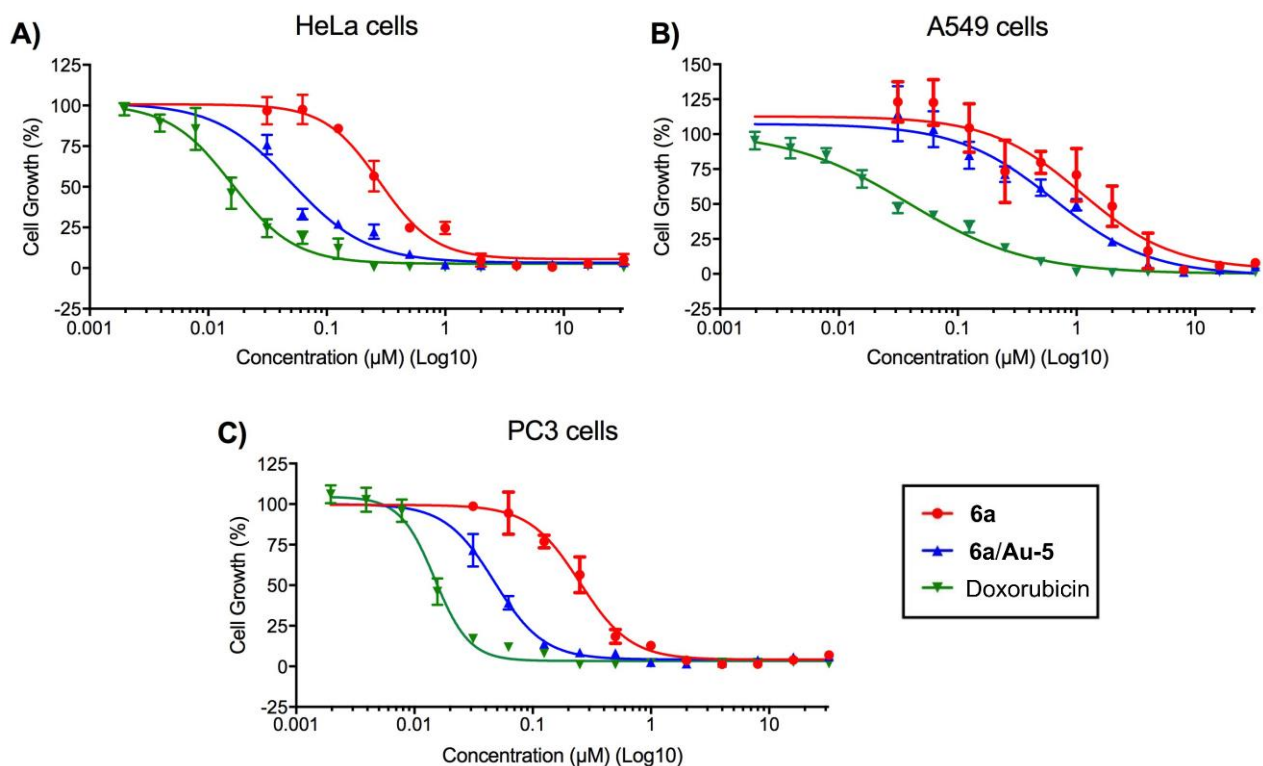

**Figure S17.** Cell growth curves aimed at exploring the effects of either prodrug **6a** (red), mixture **6a/Au-5** (blue), or doxorubicin (green) supplementation to cultures of A) HeLa cells, B) A549 cells, and C) PC3 cells.

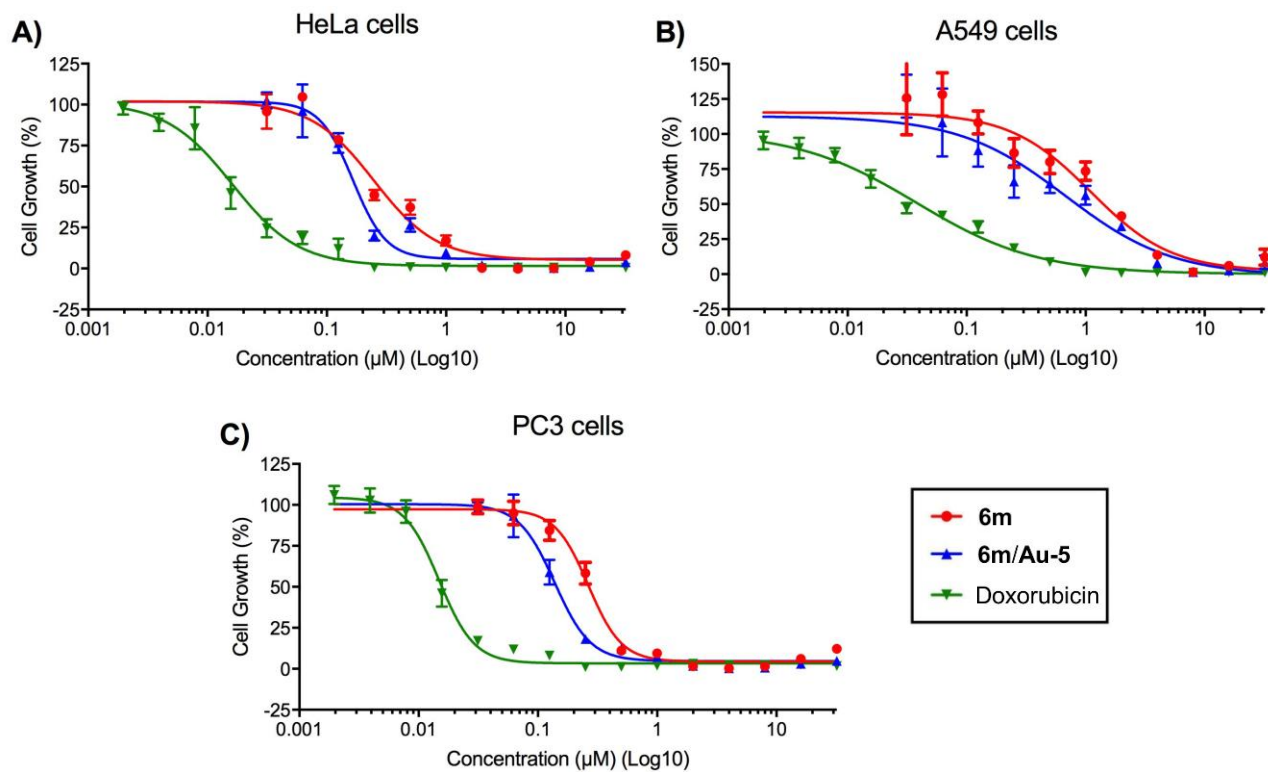

**Figure S18.** Cell growth curves aimed at exploring the effects of either prodrug **6m** (red), mixture **6m/Au-5** (blue), or doxorubicin (green) supplementation to cultures of A) HeLa cells, B) A549 cells, and C) PC3 cells.

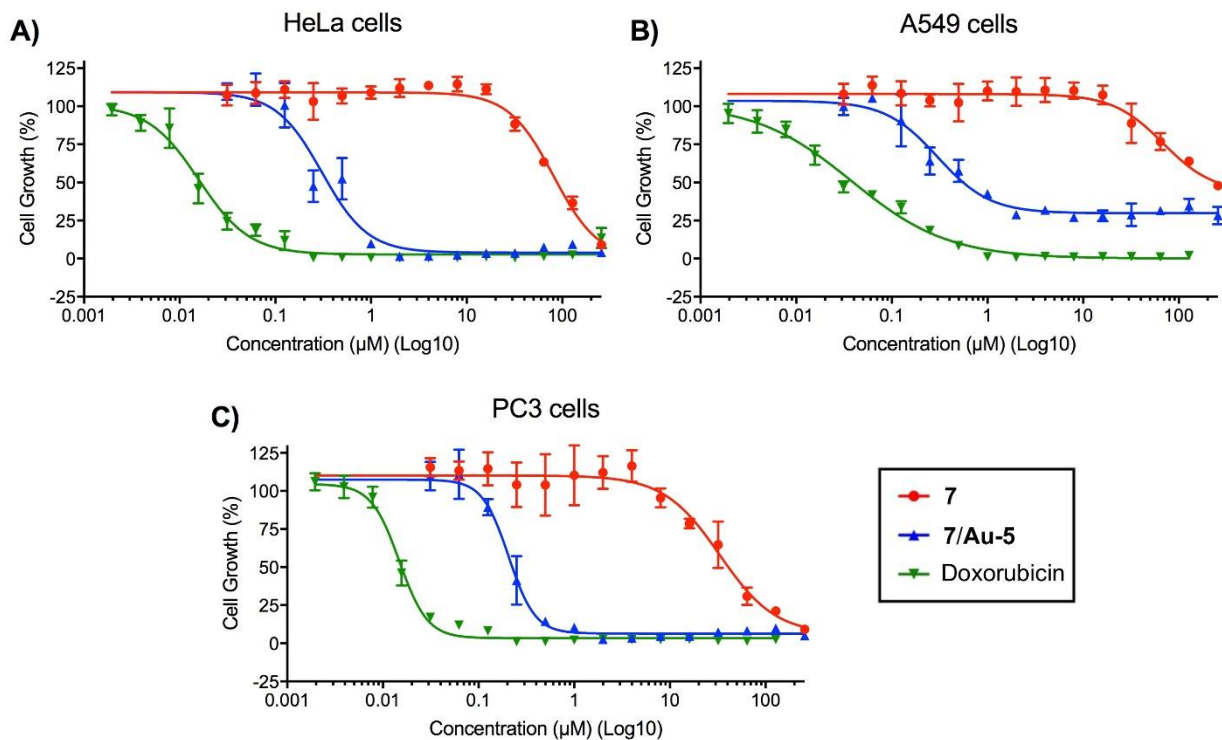

**Figure S19.** Cell growth curves aimed at exploring the effects of either prodrug **7** (red), mixture **7/Au-5** (blue), or doxorubicin (green) supplementation to cultures of A) HeLa cells, B) A549 cells, and C) PC3 cells.

## 2.3 Cell Permeability Studies

### 2.3.1 Incubation and Imaging Protocol

To monitor the penetration of compounds under study, fluorescent cell imaging was performed. Given that doxorubicin (and similar derivatives) are known to produce fluorescence ( $\lambda_{\text{EX}} = 470 \text{ nm}$  /  $\lambda_{\text{EM}} = 560 \text{ nm}$ ), cell penetration can be comparatively quantified via fluorescent imaging of cells incubated under various conditions.

HeLa cells were first plated onto ibidi  $\mu$ -Slide 8 well chamber slides at approximately 30,000 cells/well and grown overnight. In each well, 280  $\mu\text{l}$  of fresh DMEM media was then added, followed by 20  $\mu\text{l}$  of compound (150  $\mu\text{M}$  stock solution), which gave a final concentration of 10  $\mu\text{M}$  doxorubicin, **6a**, or **7**. After incubations at 37°C for set time intervals (1, 2, 4, 8 hr), cells were washed with DMEM media (2 $\times$ ) and PBS buffer pH 7.4 (2 $\times$ ). Imaging studies were then carried out using a Keyence BZ-X710 All-in-one Fluorescence Microscope® at 20 $\times$  magnification. Brightfield images (color) were obtained at a 1/150 sec exposure setting and fluorescent images were obtained at a 1.2 sec exposure setting.

### 2.3.2 Cell Imaging Results

Cells from obtained images were randomly chosen (n=15) and their fluorescence was quantified via ImageJ. Shown in Figures S20-S31 are the cropped images of the cells used for quantification. Under set time intervals (1, 2, 4, 8 hours), incubations were carried out using either doxorubicin, **6a**, or **7**.

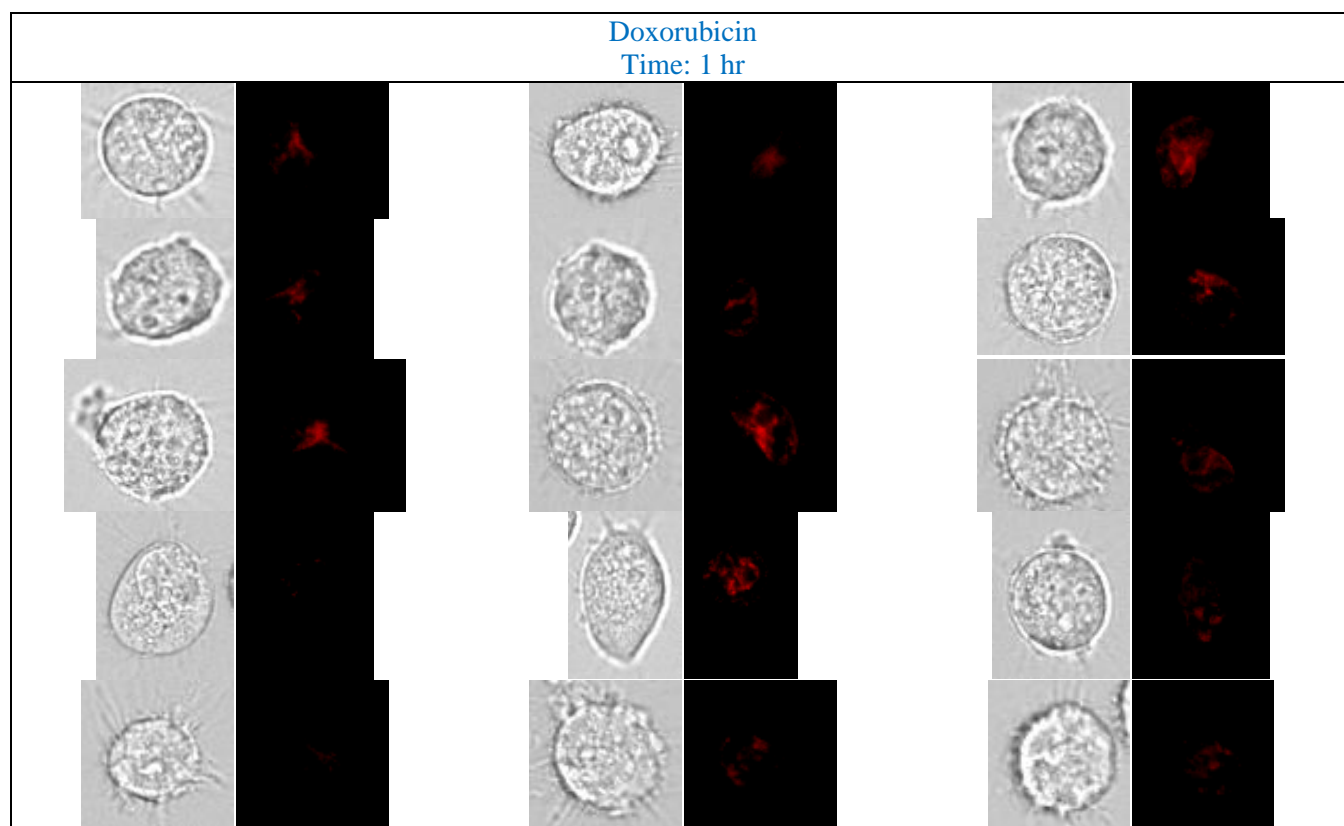

**Figure S20.** Imaging studies of HeLa cells incubated with Doxorubicin (10  $\mu\text{M}$ ) for 1 hr.

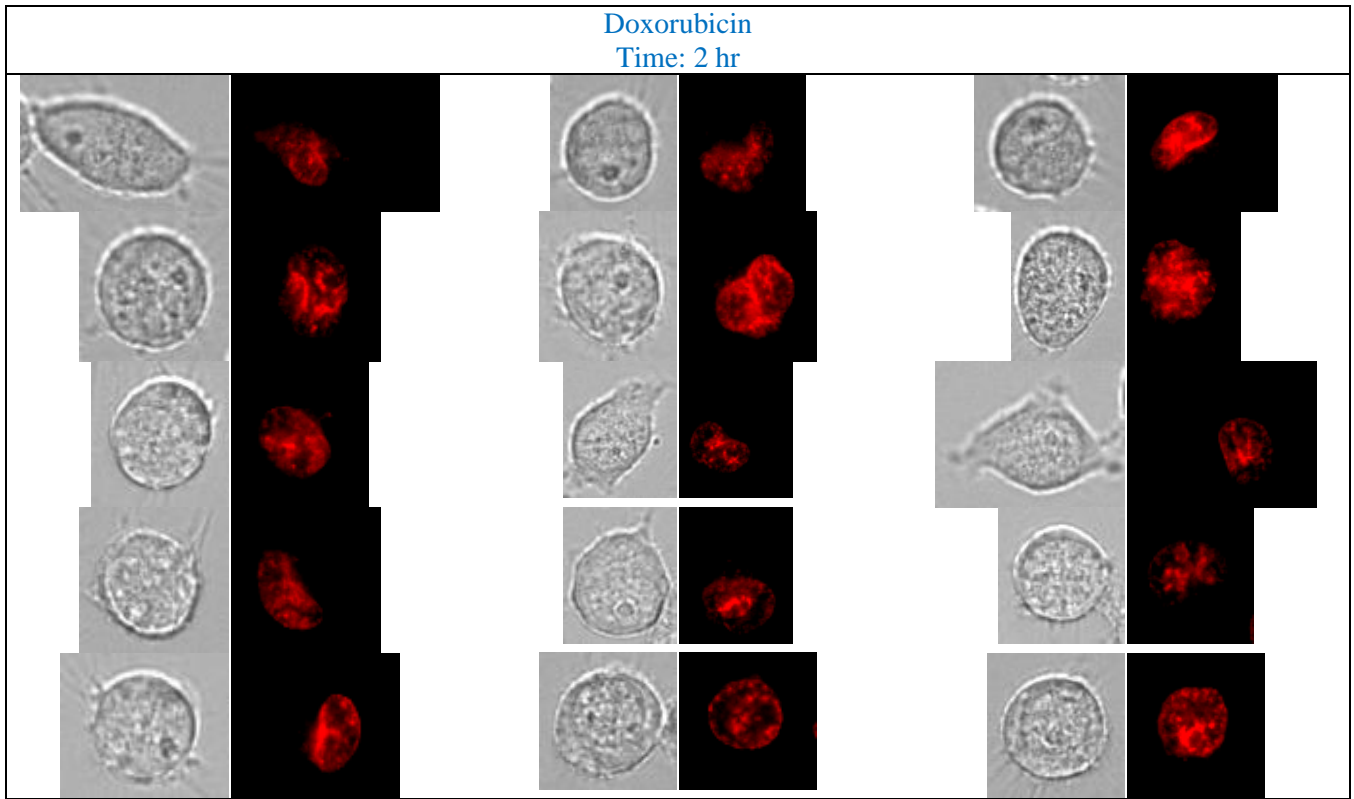

**Figure S21.** Imaging studies of HeLa cells incubated with Doxorubicin (10  $\mu$ M) for 2 hr.

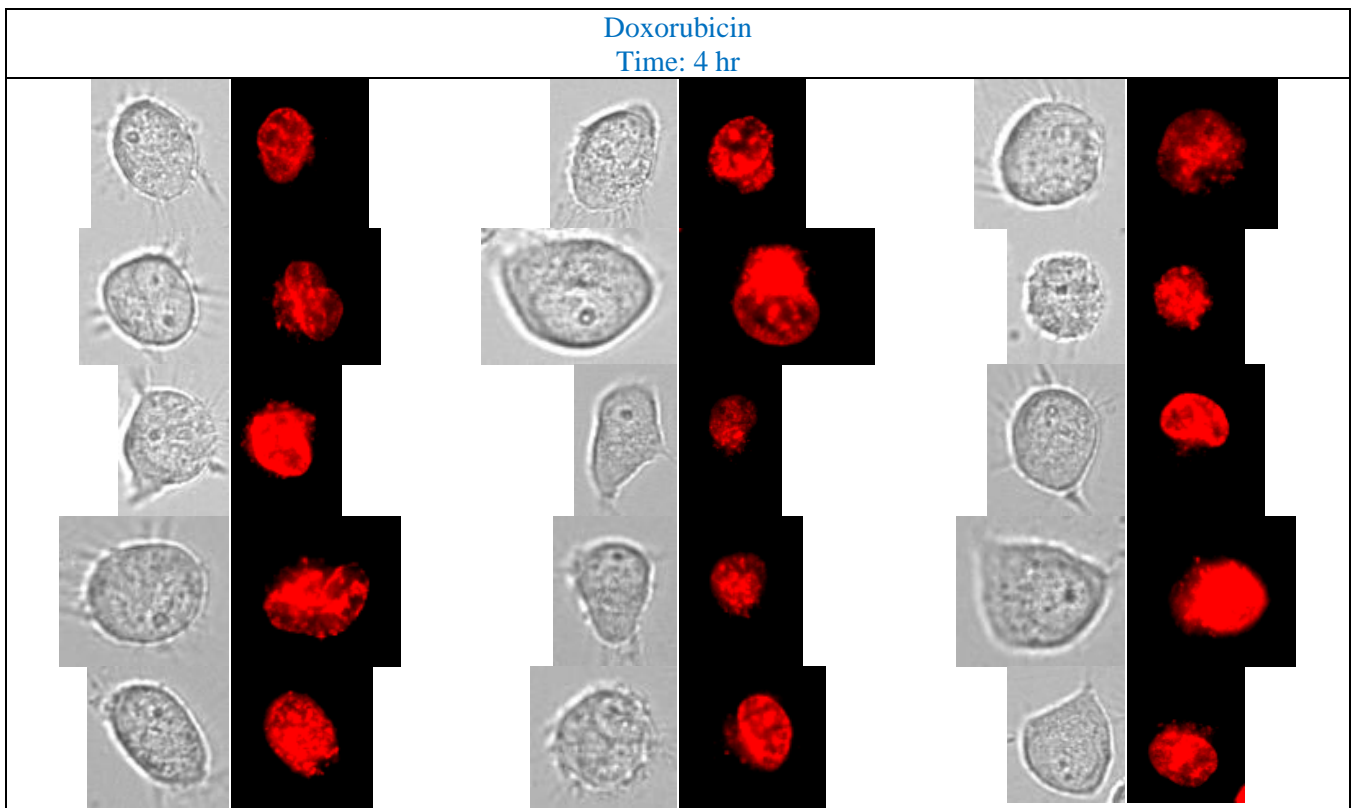

**Figure S22.** Imaging studies of HeLa cells incubated with Doxorubicin (10  $\mu$ M) for 4 hr.



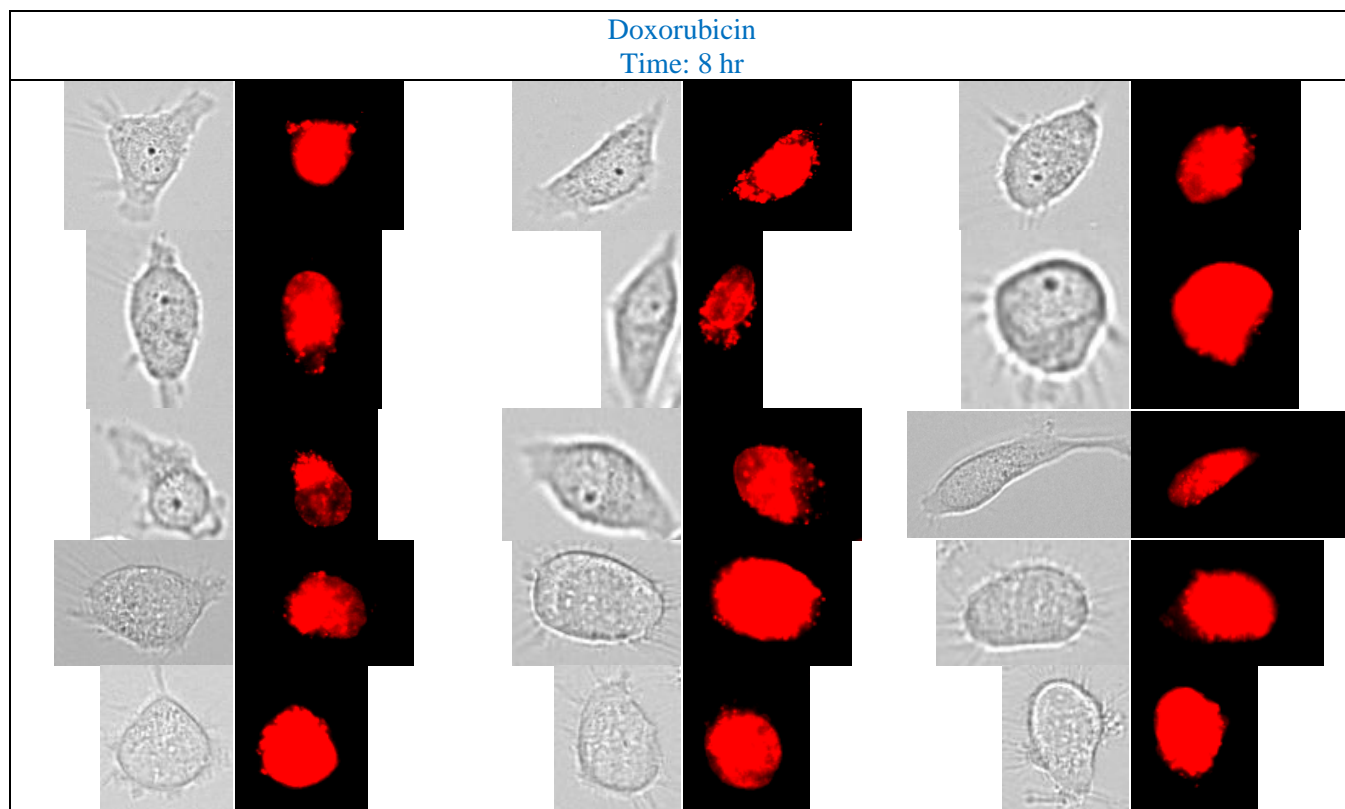

**Figure S23.** Imaging studies of HeLa cells incubated with Doxorubicin (10  $\mu$ M) for 8 hr.

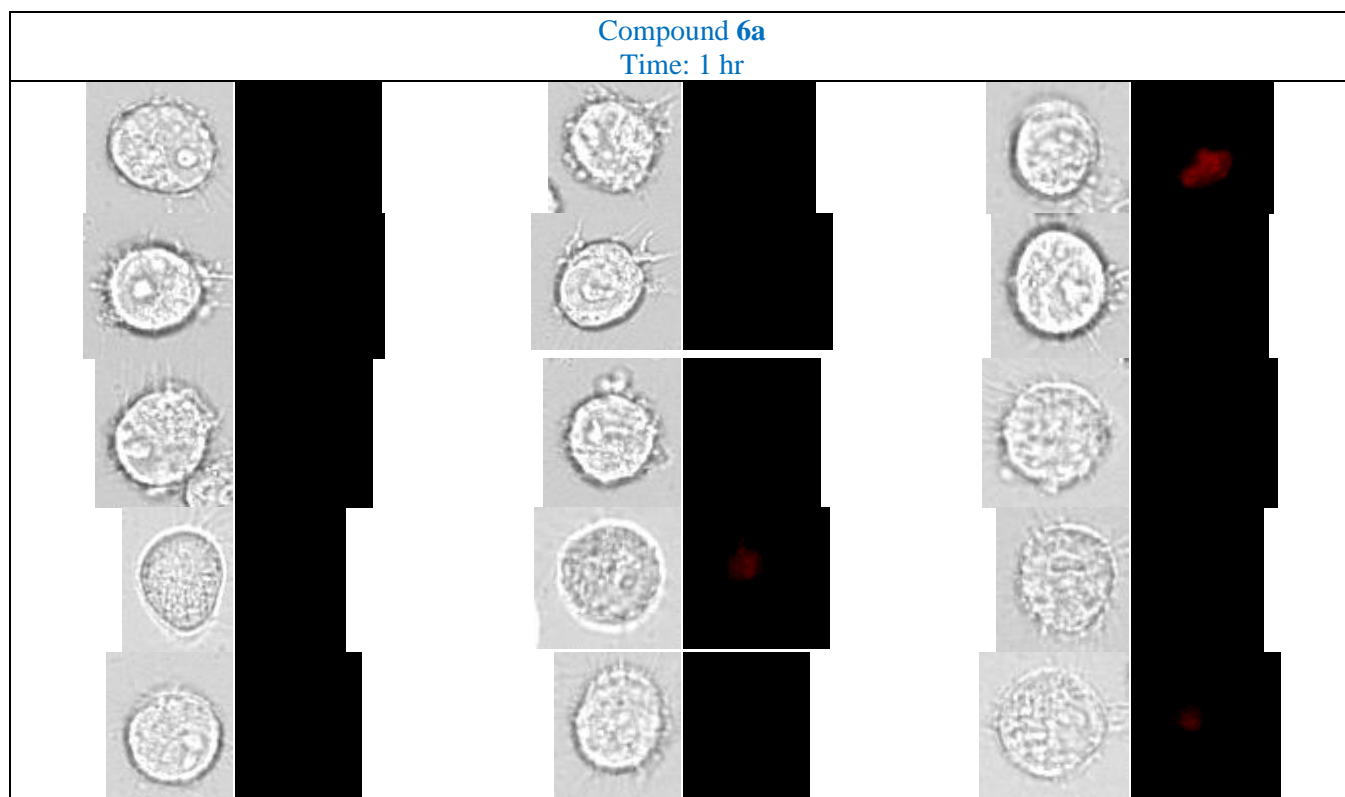

**Figure S24.** Imaging studies of HeLa cells incubated with compound **6a** (10  $\mu$ M) for 1 hr.

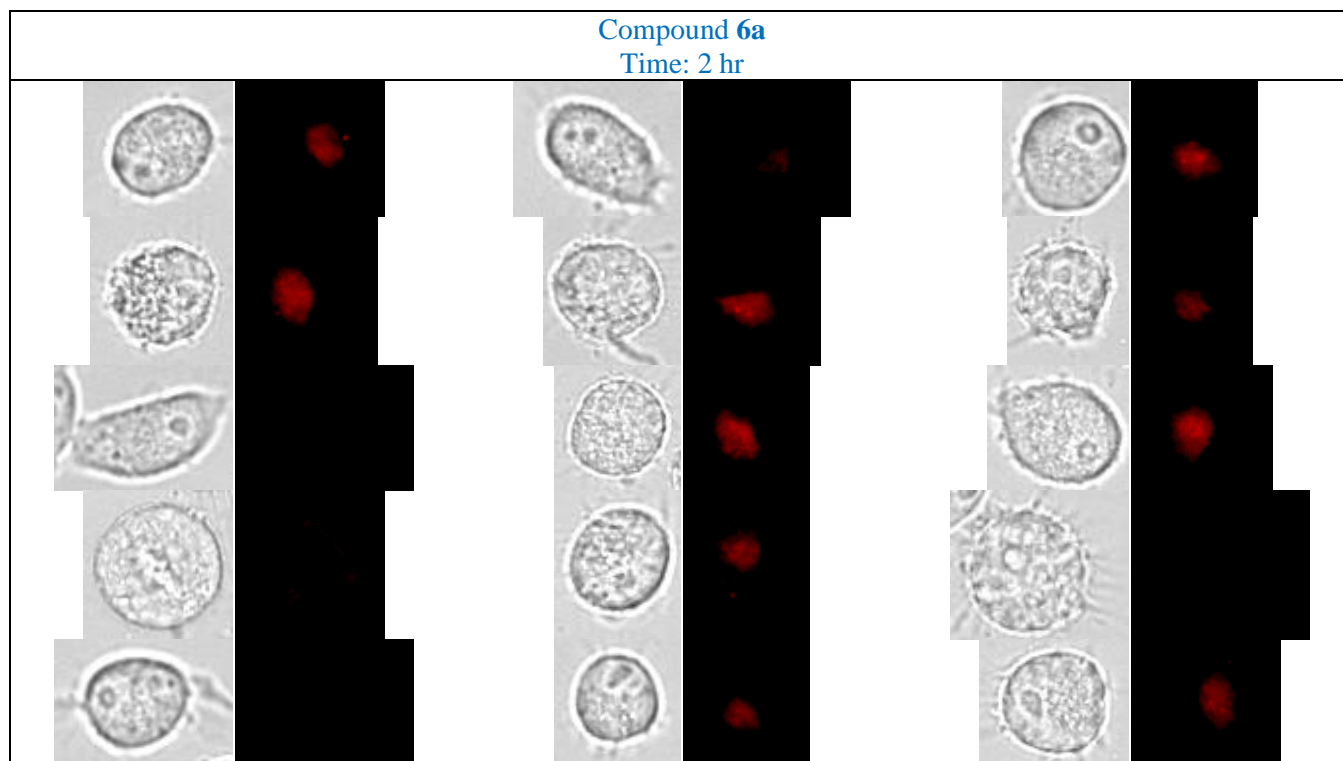

**Figure S25.** Imaging studies of HeLa cells incubated with compound **6a** (10  $\mu$ M) for 2 hr.

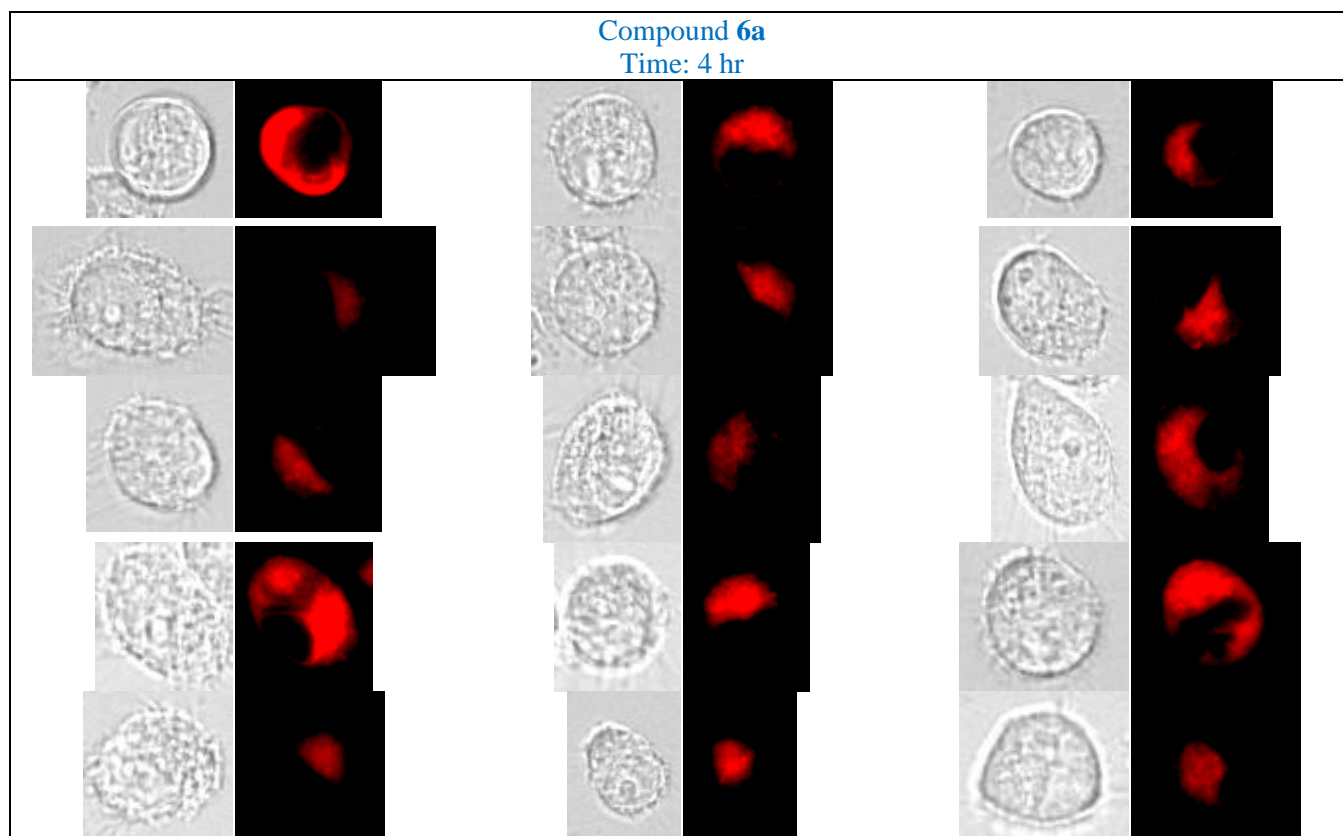

**Figure S26.** Imaging studies of HeLa cells incubated with compound **6a** (10  $\mu$ M) for 4 hr.



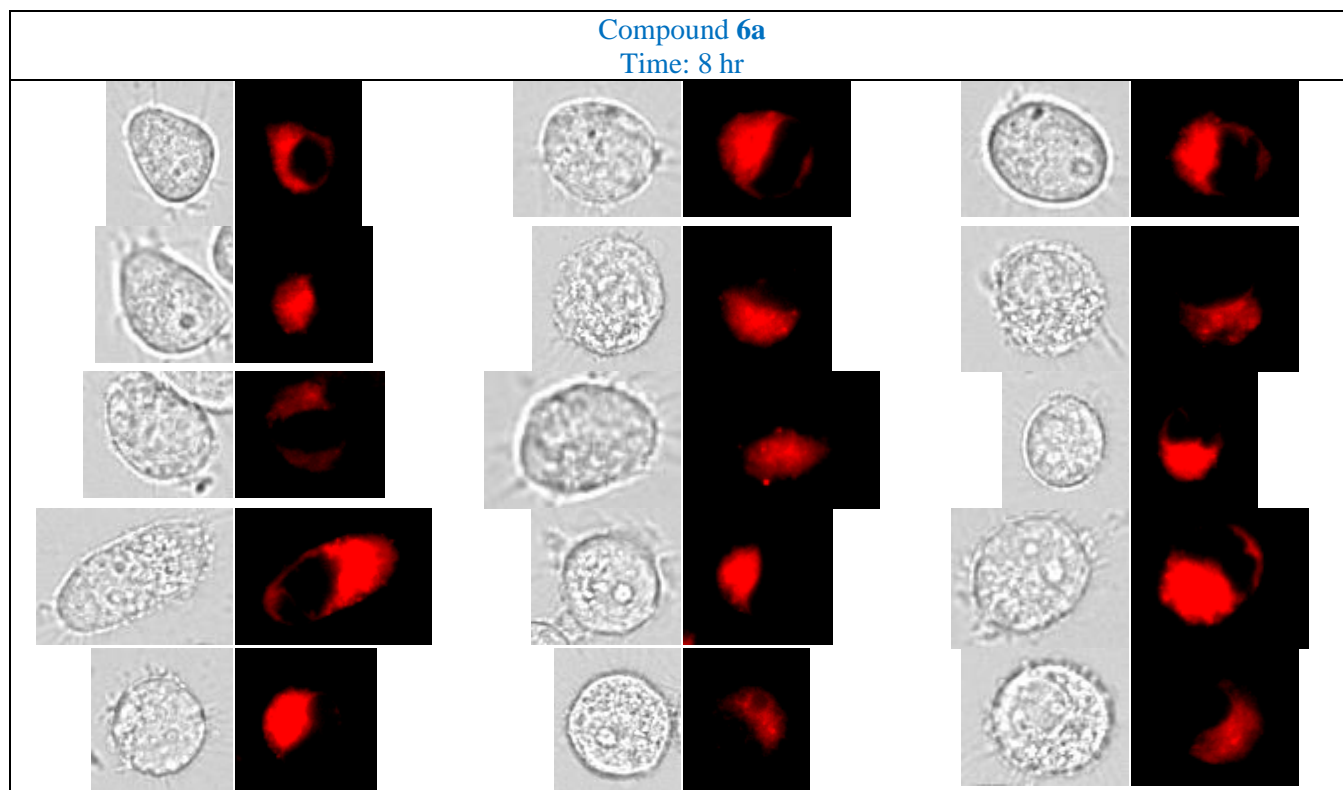

**Figure S27.** Imaging studies of HeLa cells incubated with compound **6a** (10  $\mu$ M) for 8 hr.

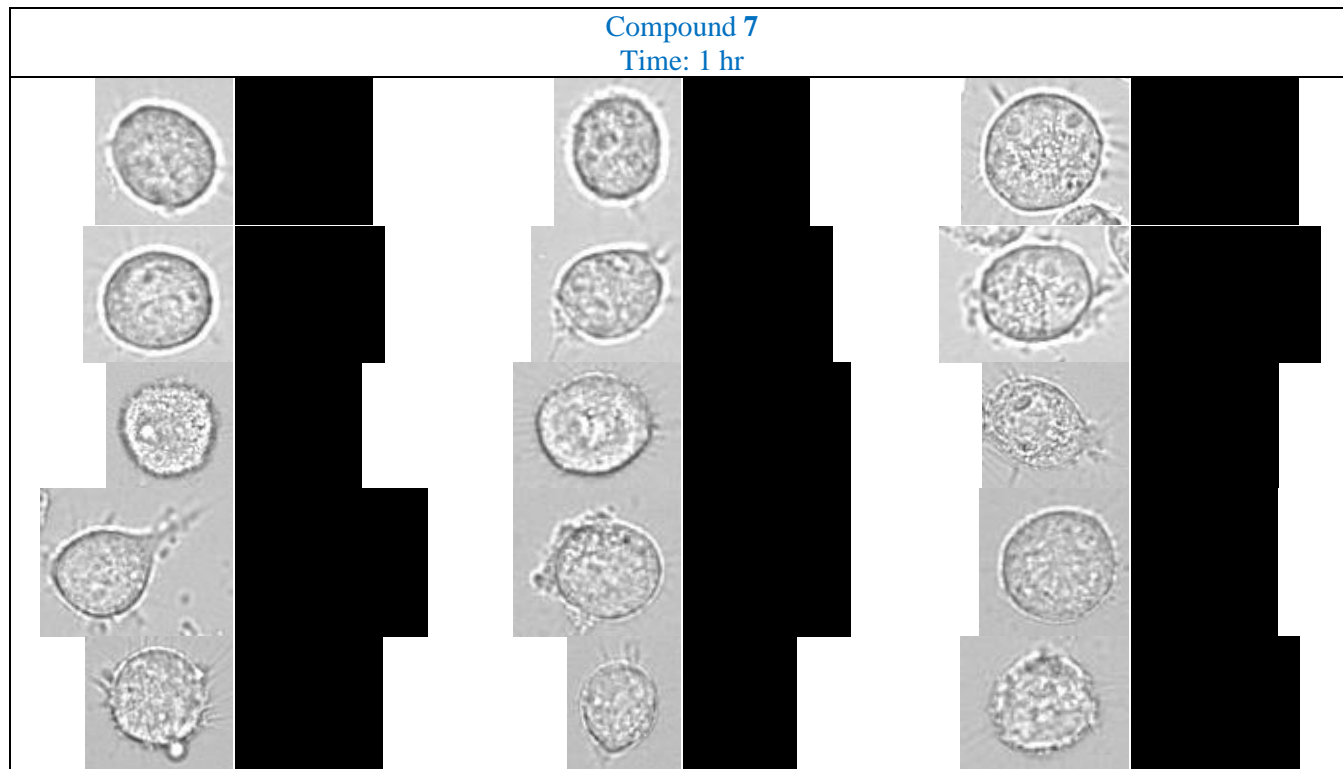

**Figure S28.** Imaging studies of HeLa cells incubated with compound **7** (10  $\mu$ M) for 1 hr.

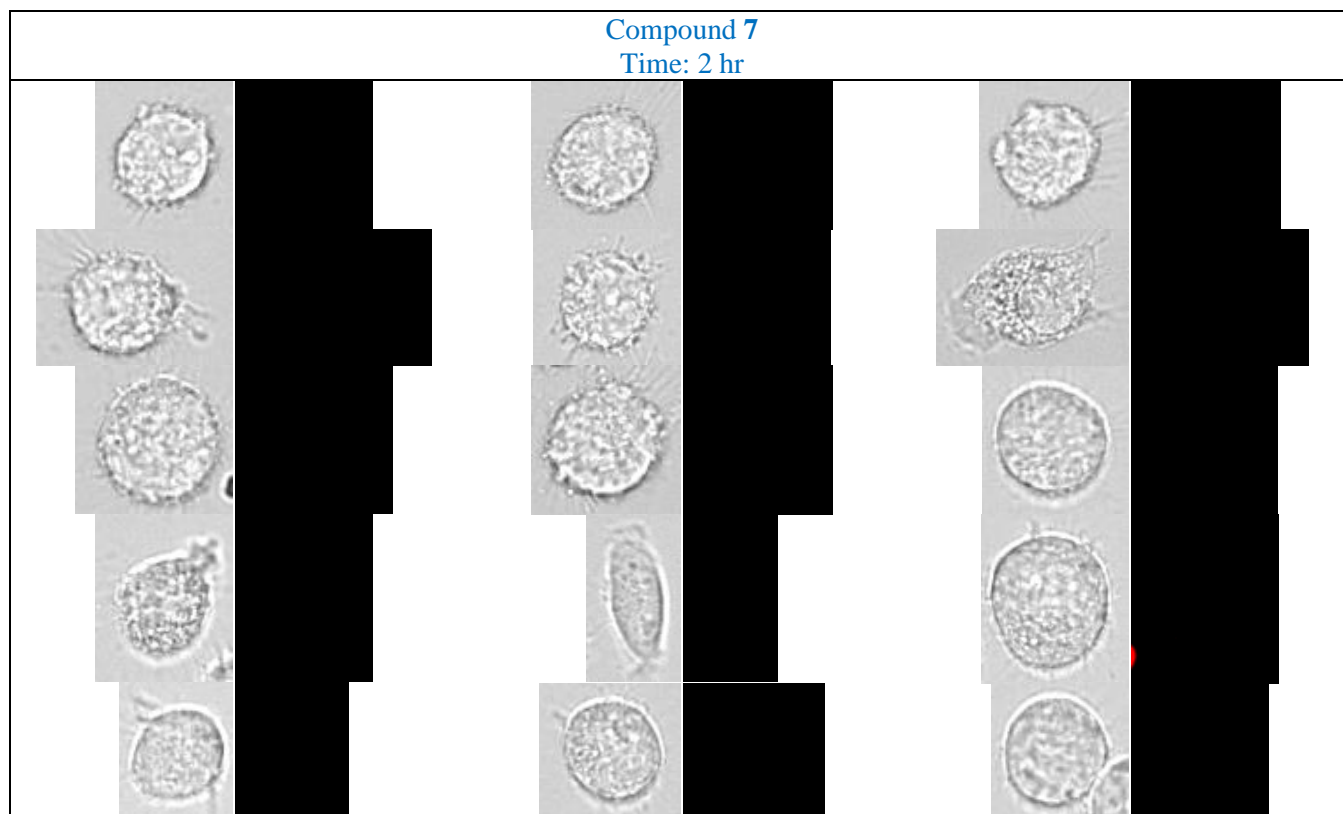

**Figure S29.** Imaging studies of HeLa cells incubated with compound 7 (10  $\mu$ M) for 2 hr.

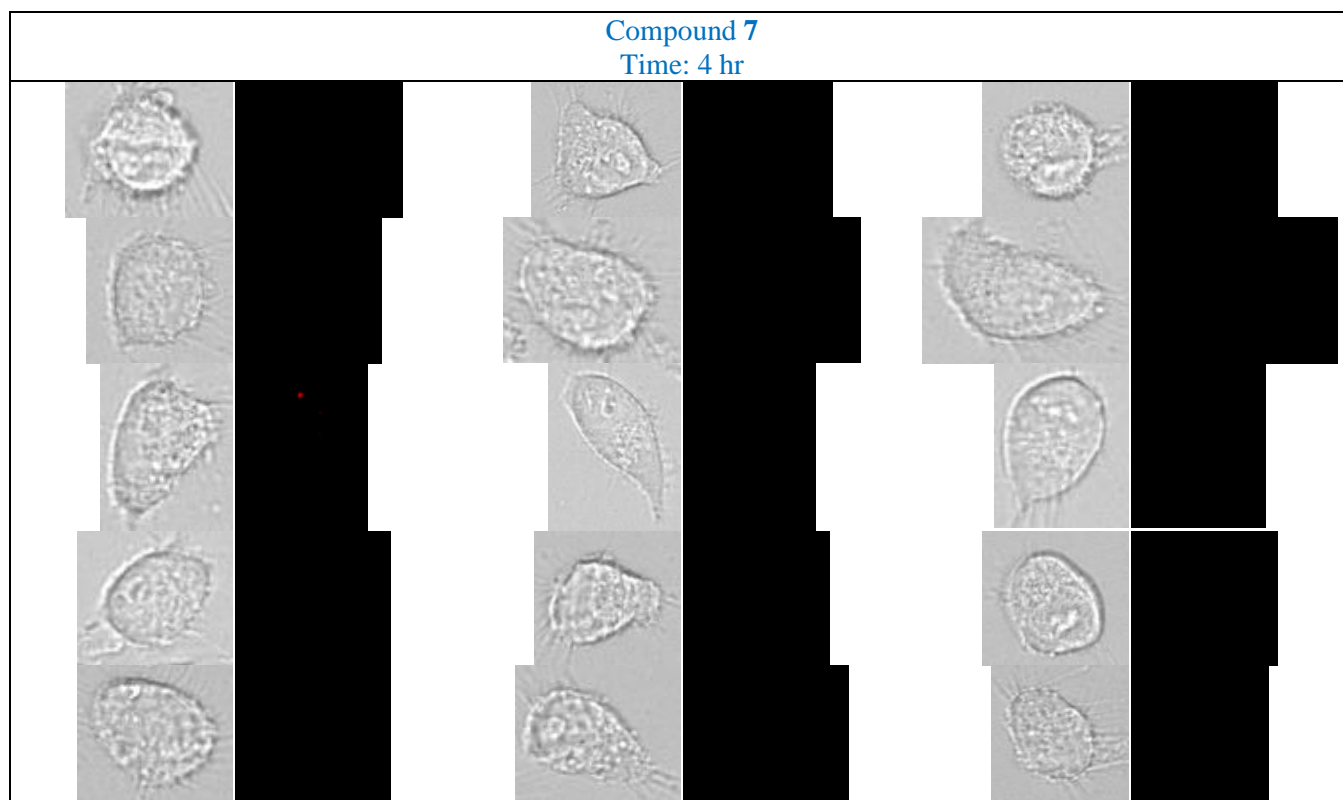

**Figure S30.** Imaging studies of HeLa cells incubated with compound 7 (10  $\mu$ M) for 4 hr.

Compound 7  
Time: 8 hr

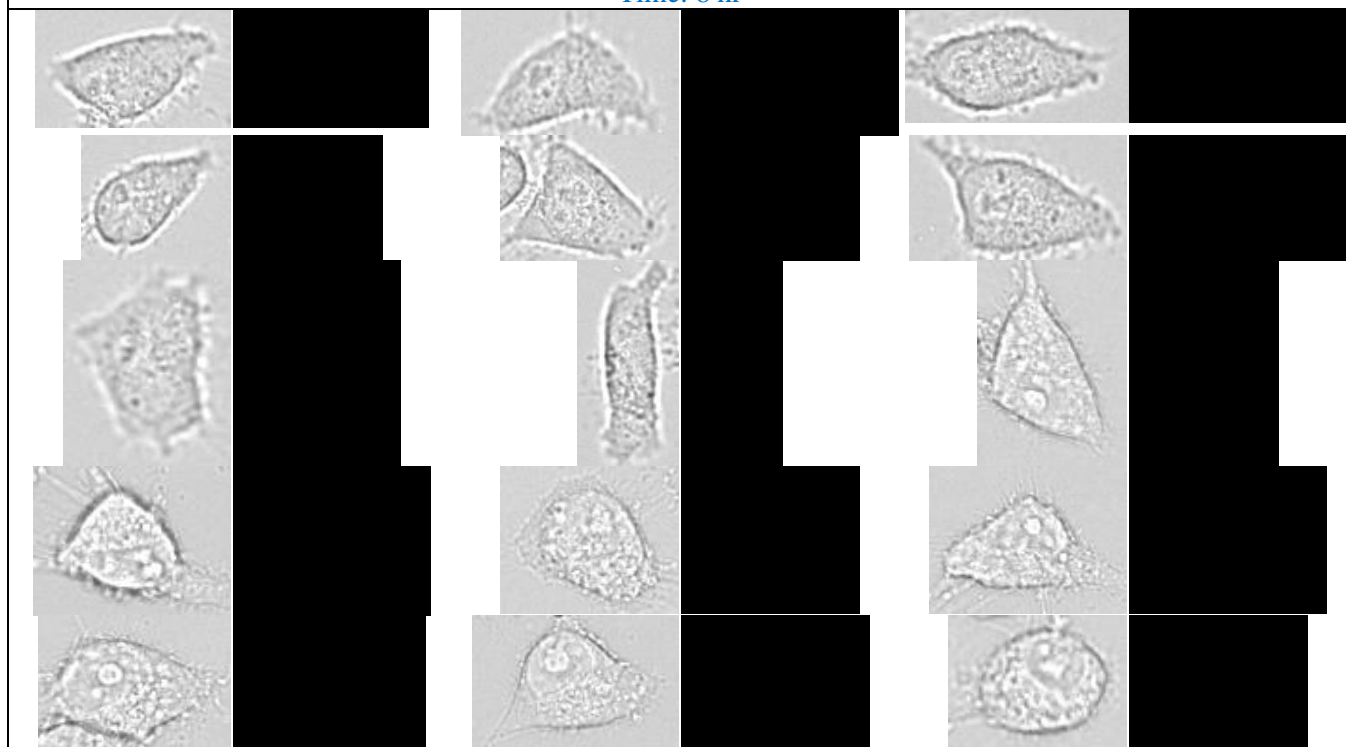

**Figure S31.** Imaging studies of HeLa cells incubated with compound 7 (10  $\mu$ M) for 8 hr.

### 3. References

1. Cheng, W.; Co, E. W.; Kim, M. H.; Klein, R. R.; Le Donna, T.; Lew, A.; Nuss, J. M.; Xu, W. **2005**, WO2005039506A2.
2. Sawada, K.; Zenkoh, T.; Terasawa, T.; Imamura, Y.; Fukudome, H.; Kuroda, S.; Maeda, J.; Watanabe, J.; Inami, H.; Takeshita, N. **2007**, WO2007026920A2.
3. Peterson, K. L.; Dang, J. V.; Weitz, E. A.; Lewandowski, C.; Pierre, V. C. *Inorg. Chem.* **2014**, *53*, 6013.
4. Huy, P.; Neudorfl, J. M.; Schmalz, H. G. *Org. Lett.* **2011**, *13*, 216.
5. Thiede, S.; Winterscheid, P. M.; Hartmann, J.; Schnakenburg, G.; Essig, S.; Menche, D. *Synthesis* **2016**, *48*, 697.
6. Döbele, M.; Vanderheiden, S.; Jung, N.; Brase, S. *Angew. Chem. Int. Ed.* **2010**, *49*, 5986.
7. Letavic, M.; Rudolph, D. A.; Savall, B. M.; Shireman, B. T.; Swanson, D. **2012**, WO2012145581A1.
8. Kuduk, S. D.; Di Marco, C. N.; Chang, R. K.; Wood, M. R.; Schirripa, K. M.; Kim, J. J.; Wai, J. M. C.; DiPardo, R. M.; Murphy, K. L.; Ransom, R. W.; Harrell, C. M.; Reiss, D. R.; Holahan, M. A.; Cook, J.; Hess, J. F.; Sain, N.; Urban, M. O.; Tang, C.; Prueksaritanont, T.; Pettibone, D. J.; Bock, M. G. *J. Med. Chem.* **2007**, *50*, 272.
9. Srogl, J.; Hyvl, J.; Revesz, A.; Schroder, D. *ChemComm* **2009**, 3463.
10. Floersheim, P.; Froestl, W.; Guery, S.; Kaupmann, K.; Koller, M. **2006**, WO2006136442A1.
11. Bowers, E. M.; Yan, G.; Mukherjee, C.; Orry, A.; Wang, L.; Holbert, M. A.; Crump, N. T.; Hazzalin, C. A.; Liszczak, G.; Yuan, H.; Larocca, C.; Saldanha, S. A.; Abagyan, R.; Sun, Y.; Meyers, D. J.; Marmorstein, R.; Mahadevan, L. C.; Alani, R. M.; Cole, P. A. *Chem. Biol.* **2010**, *17*, 471.
12. Wilkinson, S. M.; Gunosewoyo, H.; Barron, M. L.; Boucher, A.; McDonnell, M.; Turner, P.; Morrison, D. E.; Bennett, M. R.; McGregor, I. S.; Rendina, L. M.; Kassiou, M. *ACS Chem. Neurosci.* **2014**, *5*, 335.
13. Spivey, A. C.; McKendrick, J.; Srikanan, R.; Helm, B. A. *J. Org. Chem.* **2003**, *68*, 1843.
14. Allart, B.; Lehtolainen, P.; Yla-Herttuala, S.; Martin, J. F.; Selwood, D. L. *Bioconjugate Chem.* **2003**, *14*, 187.
15. Cotterill, I. C.; Rich, J. O.; Scholten, M. D.; Mozhaeva, L.; Michels, P. C. *Biotechnol. Bioeng.* **2008**, *101*, 435.
16. Pérez-López, A. M.; Rubio-Ruiz, B.; Sebastián, V.; Hamilton, L.; Adam, C.; Bray, T. L.; Irusta, S.; Brennan, P. M.; Lloyd-Jones, G. C.; Sieger, D.; Santamaría, J.; Unciti-Broceta, A. *Angew. Chem. Int. Ed.* **2017**, *56*, 12548.
17. Abe, M.; Kubo, A.; Yamamoto, S.; Hatoh, Y.; Murai, M.; Hattori, Y.; Makabe, H.; Nishioka, T.; Miyoshi, H. *Biochemistry* **2008**, *47*, 6260.
18. Nierengarten, J. F.; Zhang, S.; Gégout, A.; Urbani, M.; Armaroli, N.; Marconi, G.; Rio, Y. *J. Org. Chem.* **2005**, *70*, 7550.
19. Lee, T.; Kang, H. R.; Kim, S.; Kim, S. *Tetrahedron* **2006**, *62*, 4081.
20. Percec, V.; Rudick, J. G.; Peterca, M.; Wagner, M.; Obata, M.; Mitchell, C. M.; Cho, W. D.; Balagurusamy, V. S. K.; Heiney, P. A. *J. Am. Chem. Soc.* **2005**, *127*, 15257.
21. Pandey, B. K.; Smith, M. S.; Torgerson, C.; Lawrence, P. B.; Matthews, S. S.; Watkins, E.; Groves, M. L.; Prigozhin, M. B.; Price, J. L. *Bioconjugate Chem.* **2013**, *24*, 796.
22. Jordan, J. P.; Grubbs, R. H. *Angew. Chem. Int. Ed.* **2007**, *46*, 5152.
